# Supplementary material for: Acceptance of Different Self-sampling Methods for Semiweekly SARS-CoV-2 Testing in Asymptomatic Children and Childcare Workers at German Day Care Centers: A Nonrandomized Controlled Trial
Source: PubMed Central journal article supplement (PMC9478779; doi:10.1001/jamanetworkopen.2022.31798), 2022-09-15
Supplement: jamanetwopen-e2231798-s001.pdf [file jamanetwopen-e2231798-s001.pdf]

1  
2  
3  
4  
5  
6  
7  
8  
9  
10  
11  
12  
13  
14  
15  
16  
17  
18  
19  
20  
21  
22  
23  
24  
25  
26

**Wuerzburg child care study during the COVID-19 pandemic, Part II (Wue-KiT-Ta-CoV 2.0):**

**Surveillance of SARS-CoV-2 infections in daycare centers (KiTas) by means of submission of mouthwash samples 2x/week for pooled PCR and/or antigen rapid testing at home (pilot project)**

**Direction of study:**

Prof. Dr. med. Johannes Liese, MSc  
Prof. Dr. med. Oliver Kurzai

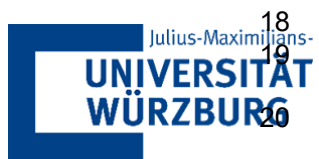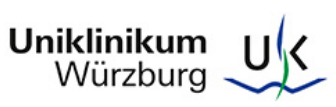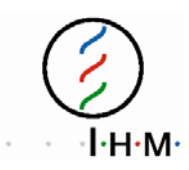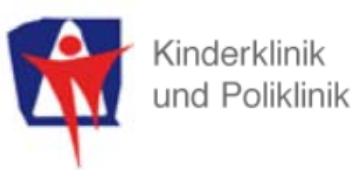

**Date of the version:**

2021-03-30

27

Version 1.1

28

© Copyright Template - IKE-B

29 **TABLE OF CONTENTS**

|    | <b>PAGE</b>                                                                  |
|----|------------------------------------------------------------------------------|
| 30 |                                                                              |
| 31 |                                                                              |
| 32 | <b>1 GENERAL INFORMATION..... 5</b>                                          |
| 33 | 1.1 Institutions involved and responsible persons ..... 5                    |
| 34 | 1.2 Signatures ..... 7                                                       |
| 35 | 1.3 Abbreviations..... 8                                                     |
| 36 | 1.4 Synopsis ..... 9                                                         |
| 37 | 1.5 Flow diagram order of study course/recruitment/data acquisition ..... 17 |
| 38 | 1.6 Background: COVID-19 and childcare ..... 18                              |
| 39 | 1.7 Questions Wue-Kita-CoV 2.0 ..... 23                                      |
| 40 | 1.8 Risk-benefit ratio ..... 24                                              |
| 41 | <b>2 STUDY OBJECTIVES ..... 28</b>                                           |
| 42 | 2.1 Primary hypothesis ..... 28                                              |
| 43 | 2.2 Secondary / further hypotheses ..... 28                                  |
| 44 | 2.3 Study design and time line ..... 29                                      |
| 45 | <b>3 STUDY POPULATION..... 31</b>                                            |
| 46 | 3.1 Procedure for the selection of facilities..... 31                        |
| 47 | 3.2 Inclusion criteria for test subjects at the facilities..... 31           |
| 48 | <b>4 ORDER OF STUDY ..... 32</b>                                             |
| 49 | 4.1 Recruitment of study centers and test persons ..... 32                   |
| 50 | 4.2 Information and consent..... 32                                          |
| 51 | 4.3 Interview and clinical examinations ..... 33                             |
| 52 | <b>5 TEST PERSONS SAFETY, WORK SAFETY ..... 40</b>                           |
| 53 | <b>6 DATA PROCESSING ..... 41</b>                                            |
| 54 | 6.1 Source data and material ..... 41                                        |
| 55 | 6.2 Study database ..... 42                                                  |
| 56 | 6.3 Laboratory methods ..... 43                                              |
| 57 | 6.4 Samples ..... 44                                                         |
| 58 | <b>7 BIOMETRIC ASPECTS ..... 46</b>                                          |
| 59 | 7.1 Endpoints ..... 46                                                       |
| 60 | 7.2 Procedure for data analysis..... 48                                      |
| 61 | 7.3 Analysis populations..... 49                                             |
| 62 | 7.4 Evaluation points ..... 49                                               |
| 63 | 7.5 Case number discussion and power analysis ..... 49                       |
| 64 | <b>8 QUALITY ASSURANCE AND CONTROL ..... 51</b>                              |
| 65 | 8.1 Data flow diagram / responsibilities ..... 53                            |
| 66 | <b>9 PUBLICATION OF THE RESULTS..... 54</b>                                  |
| 67 | <b>10 TEST PERSONS INSURANCE ..... 55</b>                                    |
| 68 | <b>11 ETHICAL BASIS ..... 56</b>                                             |
| 69 | 11.1 Ethics vote ..... 56                                                    |
| 70 | 11.2 Test persons information and consent for sample collection..... 56      |
| 71 | 11.3 Consent to take part in the study..... 56                               |
| 72 | 11.4 Usage, storage and transfer of the data ..... 57                        |

---

|    |           |                                    |           |
|----|-----------|------------------------------------|-----------|
| 73 | <b>12</b> | <b>LITERATURE</b> .....            | <b>58</b> |
| 74 | <b>13</b> | <b>APPENDIX</b> .....              | <b>60</b> |
| 75 | 13.1      | Participant information.....       | 60        |
| 76 | 13.2      | Declaration of consent.....        | 60        |
| 77 | 13.3      | Survey tools.....                  | 60        |
| 78 | 13.4      | Further information material ..... | 60        |

79

80

81

82

83

84

85

86 **Preliminary note:**

87 The present study protocol on Wue-KiTā-CoV 2.0 is based on the study protocol of the  
88 previous study Wue-KiTā-CoV by the same authors. This previous study protocol has not yet  
89 been published and is therefore not yet accessible to the general public.

90 Since the study was conducted identically to a great extent, these parts of the text were  
91 taken over from the previous study protocol unchanged or with only slight modifications (in  
92 particular Sections 1.6, 1.8, 3.1, 4.3.2, 4.3.3., 6.2, 8, 9, 10, 11, 12, 13.)

93

94 **1 GENERAL INFORMATION**95 **1.1 Participating institutions and persons responsible**

|                                                                                                                                                                   |                                                                                                                                                            |
|-------------------------------------------------------------------------------------------------------------------------------------------------------------------|------------------------------------------------------------------------------------------------------------------------------------------------------------|
| Study lead:                                                                                                                                                       | Prof. Dr. med. Johannes Liese, MSc<br>Department of Pediatrics, University Hospital Wuerzburg<br>Josef-Schneider-Str. 2-D31, 97080 Wuerzburg               |
|                                                                                                                                                                   | Prof. Dr. med. Oliver Kurzai<br>Institute for Hygiene and Microbiology, University of Wuerzburg<br>Josef-Schneider-Str. 2-E1, 97080 Wuerzburg              |
| Research scientists:                                                                                                                                              | Prof. Dr. med. Lars Dölken<br>Institute of Virology, University of Wuerzburg<br>Versbacher Str. 7, 97078 Wuerzburg                                         |
|                                                                                                                                                                   | Dr. med Géraldine Engels<br>Department of Pediatrics, University Hospital Wuerzburg<br>Josef-Schneider-Str. 2-D31, 97080 Wuerzburg                         |
|                                                                                                                                                                   | Dr. med. Johannes Forster<br>Institute for Hygiene and Microbiology, University of Wuerzburg<br>Josef-Schneider-Str. 2-E1, 97080 Wuerzburg                 |
|                                                                                                                                                                   | Prof. Dr. med. Ildikó Gágyor<br>Institute of General Medicine, University Hospital Wuerzburg<br>Josef-Schneider-Str. 2-D7, 97080 Wuerzburg                 |
|                                                                                                                                                                   | Prof. Dr. med. Marcel Romanos<br>Department of Child and Adolescent Psychiatry, University Hospital Wuerzburg<br>Margarete-Höppel-Platz 1, 97080 Wuerzburg |
|                                                                                                                                                                   | PD Dr. rer. nat. Andrea Streng<br>Department of Pediatrics, University Hospital Wuerzburg<br>Josef-Schneider-Str. 2-D31, 97080 Wuerzburg                   |
|                                                                                                                                                                   | Dr. med. Benedikt Weißbrich<br>Institute of Virology, University of Wuerzburg<br>Versbacher Str. 7, 97078 Wuerzburg                                        |
|                                                                                                                                                                   | Consultation:                                                                                                                                              |
| Dr. Hülya Düber<br>Head of the Office for Youth, Family and Social Services, Wuerzburg<br>City Council, City of Wuerzburg<br>Karmelitenstraße 43, 97070 Wuerzburg |                                                                                                                                                            |
| Monika Kraft<br>Head of the Office for Youth, Family and Social Services, Wuerzburg<br>City Council, City of Wuerzburg<br>Karmelitenstraße 43, 97070 Wuerzburg    |                                                                                                                                                            |

|                              |                                                                                                                                                                                                                                |
|------------------------------|--------------------------------------------------------------------------------------------------------------------------------------------------------------------------------------------------------------------------------|
|                              | <p>Dr. med. Johann Löw<br/>Head of Local Health Authority ("Gesundheitsamt") Wuerzburg</p>                                                                                                                                     |
|                              | <p>Dr. Barbara Finkenberg<br/>Local Health Authority ("Gesundheitsamt") Wuerzburg</p>                                                                                                                                          |
| Biometry and data management | <p>Prof. Dr. med. Peter Heuschmann<br/>Viktoria Rücker<br/>Julia Schmidt<br/>Timo Ludwig<br/>Institute for Clinical Epidemiology and Biometry,<br/>University of Wuerzburg, Josef-Schneider-Str. 2-D7, 97080<br/>Wuerzburg</p> |

96

97

98 **1.2 Signatures**

99

100

101 **Study lead:**

102

103

104

105 Wuerzburg, 2021-03-30

106

107

108

---

109

110 Prof. Dr. med. Johannes Liese, MSc

111 Department of Pediatrics, University Hospital Wuerzburg

112

113

114

115 Wuerzburg, 2021-03-30

116

117

118

---

119 Prof. Dr. Oliver Kurzai

120 Institute for Hygiene and Microbiology, University of Wuerzburg

121

122

123 **1.3 Abbreviations**

|            |                                                     |
|------------|-----------------------------------------------------|
| AG         | Antigen                                             |
| AB         | Antibody                                            |
| COVID-19   | Corona Virus Disease 2019                           |
| ELISA      | Enzyme-linked immunosorbent assay                   |
| FFP        | Filtering Face Piece                                |
| KiTa       | Daycare center                                      |
| PCR        | Polymerase chain reaction                           |
| SARS-CoV-2 | Severe Acute Respiratory Syndrome<br>Corona Virus 2 |
| VOCs       | Variants of Concern                                 |

124

125



## 1.4 Synopsis

|             |                                                                                                                                                                                                                                                                                                                                                                                                                                                                                                                                                                                                                                                                                                                                                                                                                                                                                                                                                                                                                                                                                                                                                                                                                                                                                                                                                                                                                                                                                                                                                                                                                                         |
|-------------|-----------------------------------------------------------------------------------------------------------------------------------------------------------------------------------------------------------------------------------------------------------------------------------------------------------------------------------------------------------------------------------------------------------------------------------------------------------------------------------------------------------------------------------------------------------------------------------------------------------------------------------------------------------------------------------------------------------------------------------------------------------------------------------------------------------------------------------------------------------------------------------------------------------------------------------------------------------------------------------------------------------------------------------------------------------------------------------------------------------------------------------------------------------------------------------------------------------------------------------------------------------------------------------------------------------------------------------------------------------------------------------------------------------------------------------------------------------------------------------------------------------------------------------------------------------------------------------------------------------------------------------------|
| Study title | <p>Wuerzburg child care study during the COVID-19 pandemic, Part II (Wue-KiT-Ta-CoV 2.0):</p> <p>Surveillance of SARS-CoV-2 infections in daycare centers (KiTas) by means of the submission of mouthwash samples 2x/week for pooled PCR and/or antigen rapid testing at home (pilot study)</p>                                                                                                                                                                                                                                                                                                                                                                                                                                                                                                                                                                                                                                                                                                                                                                                                                                                                                                                                                                                                                                                                                                                                                                                                                                                                                                                                         |
| Short title | <p>SARS-CoV-2 surveillance in daycare centers in Wuerzburg by means of the submission of mouthwash samples 2x/week for pooled PCR and/or antigen rapid testing at home</p> <p>Acronym: Wue-KiT-Ta-CoV 2.0</p>                                                                                                                                                                                                                                                                                                                                                                                                                                                                                                                                                                                                                                                                                                                                                                                                                                                                                                                                                                                                                                                                                                                                                                                                                                                                                                                                                                                                                           |
| Study aims  | <p>Evaluation of a surveillance concept with continuous screening for SARS-CoV-2 infections in daycare centers, based on the submission of mouthwash samples 2x/week for pooled PCR and/or antigen rapid testing at home with the following objectives:</p> <p><b><u>Main objective:</u></b></p> <p><u>Usability:</u></p> <ul style="list-style-type: none"> <li>- Evaluation of the initial acceptance (initial consent for respiratory sampling)</li> </ul> <p><b><u>Secondary objectives:</u></b></p> <p><u>Usability:</u></p> <ul style="list-style-type: none"> <li>- Evaluation of long-term acceptance (drop-out rates for respiratory sampling)</li> </ul> <p><u>Effectivity (as a screening instrument):</u></p> <ul style="list-style-type: none"> <li>- Evaluation of detection rates of SARS-CoV-2 infection in daycare centers overall (children plus child care staff) and for children as a function of local incidence in the corresponding age group.</li> </ul> <p><b><u>Further objectives:</u></b></p> <p><u>Usability:</u></p> <ul style="list-style-type: none"> <li>- Evaluation of the acceptance in individual participant groups</li> <li>- Evaluation of the long-term psychosocial effects</li> <li>- Evaluation of the acceptance on the part of the children</li> <li>- Evaluation of the test strategy "respiratory sampling (any)" or "submission of mouthwash samples 2x/week" as a long-term concept (6 months, incorporating participant data from the earlier study Wue-KiT-Ta-CoV)</li> <li>- Evaluation of the consequences of the test results for the participants / daycare centers</li> </ul> |

|             |                                                                                                                                                                                                                                                                                                                                                                                                                                                                                                                                                                                                                                                                                                                                                                                                                                                                                                                                                                                                                                                                                                                                                                                                                                                                                                                                                                                                                     |
|-------------|---------------------------------------------------------------------------------------------------------------------------------------------------------------------------------------------------------------------------------------------------------------------------------------------------------------------------------------------------------------------------------------------------------------------------------------------------------------------------------------------------------------------------------------------------------------------------------------------------------------------------------------------------------------------------------------------------------------------------------------------------------------------------------------------------------------------------------------------------------------------------------------------------------------------------------------------------------------------------------------------------------------------------------------------------------------------------------------------------------------------------------------------------------------------------------------------------------------------------------------------------------------------------------------------------------------------------------------------------------------------------------------------------------------------|
|             | <p><u>Effectivity (as a screening instrument):</u></p> <ul style="list-style-type: none"> <li>- Evaluation of detection rates of SARS-CoV-2 infection using different testing strategies.</li> <li>- Evaluation of the proportion of false-positive or false-negative detections in the antigen rapid test for non-professionals (nasal swab) with parallel testing by means of PCR (mouthwash) in asymptomatic participants</li> <li>- Evaluation of the length of time between sample collection and notification of a positive test result for PCR testing</li> <li>- Evaluation of the detection rates of SARS-CoV-2 Variants of Concern (VOCs)</li> <li>- Evaluation of the detection rates as a function of the composition of the daycare center groups (e.g., proportion of study participants, proportion of participants from Group 1).</li> <li>- Determination of the SARS-CoV-2 seroprevalence (as a check for effectivity)</li> </ul> <p><u>Efficiency (evaluation of economic efficiency):</u></p> <ul style="list-style-type: none"> <li>- Evaluation of the direct costs (material, tests, transport)</li> </ul> <p><u>Scalability (evaluation of further usability):</u></p> <ul style="list-style-type: none"> <li>- Evaluation for suitability as a strategy for a regional/cross-regional 'roll out', with regard to Usability, Effectivity and Efficiency, cost-benefit assessment</li> </ul> |
| Design      | Pilot study (open, multicenter, longitudinal)                                                                                                                                                                                                                                                                                                                                                                                                                                                                                                                                                                                                                                                                                                                                                                                                                                                                                                                                                                                                                                                                                                                                                                                                                                                                                                                                                                       |
| Population  | Daycare center children aged 2 years and older (excluding after-school care children) who are cared for in predefined daycare centers (crèches and kindergartens) in Wuerzburg, as well as the child care staff at these facilities                                                                                                                                                                                                                                                                                                                                                                                                                                                                                                                                                                                                                                                                                                                                                                                                                                                                                                                                                                                                                                                                                                                                                                                 |
| Sample size | <p>'Eligible': 9 daycare centers in Wuerzburg (already participated in previous study), with approx. 650 potentially suitable children from 2 years of age and approx. 180 child care staff, organized in approx. 50 daycare center groups.</p> <p>Estimation of the initial number of participants based on the surveillance participation rate for mouthwash sampling (2x/week) as determined in Wue-KiTä-CoV:</p> <p>Children: 67 % of approx. 650 'eligible' children = approx. 436 children</p> <p>A participation rate of 67 % can be estimated from 650 children with a precision of 3.7 % (half-width of the Wilson-score 95 % CI).</p> <p>Child care staff: 86 % of approx. 180 'eligible' child care staff = approx. 155 child care staff</p> <p>A participation rate of 86 % can be estimated from 180 child</p>                                                                                                                                                                                                                                                                                                                                                                                                                                                                                                                                                                                         |



|            |                                                                                                                                                                                                                                                                                                                                                                                                                                                                                                                                                                                                                                                                                                                                                                                                                                                                                                                                                                                                                                                                                                                                                                                                                                                                                                                                                                                                                                                                                                                                                                                                                                                                                                                                                                                                                                                                                                                                                                                                                                                                                                                       |
|------------|-----------------------------------------------------------------------------------------------------------------------------------------------------------------------------------------------------------------------------------------------------------------------------------------------------------------------------------------------------------------------------------------------------------------------------------------------------------------------------------------------------------------------------------------------------------------------------------------------------------------------------------------------------------------------------------------------------------------------------------------------------------------------------------------------------------------------------------------------------------------------------------------------------------------------------------------------------------------------------------------------------------------------------------------------------------------------------------------------------------------------------------------------------------------------------------------------------------------------------------------------------------------------------------------------------------------------------------------------------------------------------------------------------------------------------------------------------------------------------------------------------------------------------------------------------------------------------------------------------------------------------------------------------------------------------------------------------------------------------------------------------------------------------------------------------------------------------------------------------------------------------------------------------------------------------------------------------------------------------------------------------------------------------------------------------------------------------------------------------------------------|
|            | <p>study center. The laboratory informs the Department of Public Health in case of a SARS-CoV-2 infection being detected. In addition, the day care center receives the information without a name being provided that a positive test has occurred. The Department of Public Health initiates further measures (such as closing the daycare center group or the daycare center, informing those tested positive about quarantine measures, etc.).</p> <p>Documentation of antigen rapid testing is done by the parents (1x/week, online query). In the case of a <u>positive</u> test, the study center can be contacted for collection/delivery of additional respiratory samples (throat swab, additional mouthwash if necessary) for prompt retesting with PCR (email, telephone hotline). The laboratory informs the Department of Public Health in case of detection of a SARS-CoV-2 infection in the follow-up testing via PCR. In addition, the day care center receives the information without a name being provided that a positive PCR test has occurred. A control smear test is offered in case of a discrepant test result.</p> <p>The following are collected additionally from the participants (after written consent):</p> <ul style="list-style-type: none"> <li>- Socio-demographic data</li> <li>- Psychosocial aspects (online survey at the beginning/end of the screening period, in addition structured interviews in the case of participant random sampling)</li> <li>- Questioning by the parents of the children on their acceptance of testing (at beginning/end of screening period); parent assessment (online survey)</li> <li>- Seroprevalence testing (antibody detection) at the beginning/end of the screening period. Collection is effected in the daycare centers by medically trained study staff.</li> </ul> <p><u>Additional</u> offer for testing of <u>symptomatic</u> participants (PCR from throat swab) in the central SARS-CoV-2 testing center at the University Hospital Wuerzburg with appointment organization via study center (email, telephone hotline).</p> |
| Laboratory | <p>PCR testing from mouthwash samples for SARS-CoV-2, including 'Variants of Concern' (VOCs):</p> <p>For children and child care staff: initially pooled, in case of a positive detection additionally single testing from reserve samples.</p> <p>Commercially available antigen rapid tests for self-testing will be provided to study participants.</p> <p>Antibody detection by means of point-of-care test (finger prick), if required with retesting (venous blood sampling; ELISA from blood serum)</p>                                                                                                                                                                                                                                                                                                                                                                                                                                                                                                                                                                                                                                                                                                                                                                                                                                                                                                                                                                                                                                                                                                                                                                                                                                                                                                                                                                                                                                                                                                                                                                                                        |
| Endpoints  | <p><b><u>Primary endpoint:</u></b></p> <p><u>Usability:</u></p>                                                                                                                                                                                                                                                                                                                                                                                                                                                                                                                                                                                                                                                                                                                                                                                                                                                                                                                                                                                                                                                                                                                                                                                                                                                                                                                                                                                                                                                                                                                                                                                                                                                                                                                                                                                                                                                                                                                                                                                                                                                       |

|  |                                                                                                                                                                                                                                                                                                                                                                                                                                                                                                                                                                                                                                                                                                                                                                                                                                                                                                                                                                                                                                                                                                                                                                                                                                                                                                                                                                                                                                                                                                                                                                                                                                                                                                                                                                                                                                                                                                                                                                                                                                                                                                                                                                                                                                                                                                                                                                                                                                                                                                                                                                                                      |
|--|------------------------------------------------------------------------------------------------------------------------------------------------------------------------------------------------------------------------------------------------------------------------------------------------------------------------------------------------------------------------------------------------------------------------------------------------------------------------------------------------------------------------------------------------------------------------------------------------------------------------------------------------------------------------------------------------------------------------------------------------------------------------------------------------------------------------------------------------------------------------------------------------------------------------------------------------------------------------------------------------------------------------------------------------------------------------------------------------------------------------------------------------------------------------------------------------------------------------------------------------------------------------------------------------------------------------------------------------------------------------------------------------------------------------------------------------------------------------------------------------------------------------------------------------------------------------------------------------------------------------------------------------------------------------------------------------------------------------------------------------------------------------------------------------------------------------------------------------------------------------------------------------------------------------------------------------------------------------------------------------------------------------------------------------------------------------------------------------------------------------------------------------------------------------------------------------------------------------------------------------------------------------------------------------------------------------------------------------------------------------------------------------------------------------------------------------------------------------------------------------------------------------------------------------------------------------------------------------------|
|  | <ul style="list-style-type: none"> <li>Initial acceptance rate of the respiratory sampling (Group 1, 2, 3 combined) on the basis of the specifications on the declaration of consent (participant rate of all suitable participants)</li> </ul> <p><b><u>Secondary endpoints:</u></b></p> <p><u>Usability:</u></p> <ul style="list-style-type: none"> <li>Participant rate stratified by participant group (1, 2, 3)</li> <li>Acceptance rate of the respective participant records defined as the share of 'successful' participations in all 'planned' specimen collections (mouthwash and/or nasal swab for non-professionals) among <u>participating</u> asymptomatic children and child care staff of the facility. For an individual participant, participation in specimen collection is considered successful when 60 % of the planned (asymptomatic) specimen collections have been successfully completed.</li> </ul> <p><i>Effectivity (as a screening instrument):</i></p> <ul style="list-style-type: none"> <li>Detection rate of SARS-CoV-2 infections in the daycare centers in total per participant/testing (daycare center children plus daycare center child care staff) and in relation to the 7-day incidence in the total population of children in the corresponding age group</li> </ul> <p><b><u>Further endpoints:</u></b></p> <p><u>Usability:</u></p> <ul style="list-style-type: none"> <li>Acceptance of the mouthwash sample submission (share of the tests carried out successfully in Group 1 plus Group 2)</li> <li>Acceptance of the non-professional antigen rapid tests (nasal swab) (share of the tests carried out successfully in Group 1 plus Group 3)</li> <li>Predictors of the acceptance for longer-term usage</li> <li>Psychosocial effects, including satisfaction and fulfillment of parents' need for safety (using questionnaires and validated scores) at the beginning and end of the study</li> <li>In subgroups: Long-term psychosocial effects, including satisfaction and fulfillment of parents' need for safety (using questionnaires and validated scores) including participants of both Wue-KiTa-CoV and Wue-KiTa-CoV 2.0 (6-month evaluation)</li> <li>Satisfaction of the children (assessment by the parents and child questionnaire in Week 1 and Week 12).</li> <li>Frequency of consequences in the case of positive tests (daycare center group closures / daycare center closures, total 'workdays lost' due to PCR-confirmed detections, and additional 'workdays lost' due to false-positive antigen rapid tests)</li> </ul> |
|--|------------------------------------------------------------------------------------------------------------------------------------------------------------------------------------------------------------------------------------------------------------------------------------------------------------------------------------------------------------------------------------------------------------------------------------------------------------------------------------------------------------------------------------------------------------------------------------------------------------------------------------------------------------------------------------------------------------------------------------------------------------------------------------------------------------------------------------------------------------------------------------------------------------------------------------------------------------------------------------------------------------------------------------------------------------------------------------------------------------------------------------------------------------------------------------------------------------------------------------------------------------------------------------------------------------------------------------------------------------------------------------------------------------------------------------------------------------------------------------------------------------------------------------------------------------------------------------------------------------------------------------------------------------------------------------------------------------------------------------------------------------------------------------------------------------------------------------------------------------------------------------------------------------------------------------------------------------------------------------------------------------------------------------------------------------------------------------------------------------------------------------------------------------------------------------------------------------------------------------------------------------------------------------------------------------------------------------------------------------------------------------------------------------------------------------------------------------------------------------------------------------------------------------------------------------------------------------------------------|

|  |                                                                                                                                                                                                                                                                                                                                                                                                                                                                                                                                                                                                                                                                                                                                                                                                                                                                                                                                                                                                                                                                                                                                                                                                                                                                                                                                                                                                                                                                                                                                                                                                                                                                                                                                                                                                                                                                                                                                                                                                                                                                                                                                                                                                                                                       |
|--|-------------------------------------------------------------------------------------------------------------------------------------------------------------------------------------------------------------------------------------------------------------------------------------------------------------------------------------------------------------------------------------------------------------------------------------------------------------------------------------------------------------------------------------------------------------------------------------------------------------------------------------------------------------------------------------------------------------------------------------------------------------------------------------------------------------------------------------------------------------------------------------------------------------------------------------------------------------------------------------------------------------------------------------------------------------------------------------------------------------------------------------------------------------------------------------------------------------------------------------------------------------------------------------------------------------------------------------------------------------------------------------------------------------------------------------------------------------------------------------------------------------------------------------------------------------------------------------------------------------------------------------------------------------------------------------------------------------------------------------------------------------------------------------------------------------------------------------------------------------------------------------------------------------------------------------------------------------------------------------------------------------------------------------------------------------------------------------------------------------------------------------------------------------------------------------------------------------------------------------------------------|
|  | <p><i>Effectivity (as a screening instrument):</i></p> <ul style="list-style-type: none"> <li>• Detection rate of SARS-CoV-2 infections in daycare centers per participant group (Group 1, 2, 3), separately for children and child care staff</li> <li>• Proportion of all positive PCR tests in total (mouthwash) (Group 1 + Group 2)</li> <li>• Proportion of all positive antigen rapid tests in total (nasal swab) (Group 1 + Group 3)</li> <li>• Comparison of detection rates of SARS-CoV-2 infections by means of non-professional antigen rapid testing (nasal swab) versus PCR (from mouthwash) in parallel testing of asymptomatic participants (Group 1) for identification of false negative detections in the antigen rapid test</li> <li>• Identification of false-positive antigen rapid testing through retesting by means of PCR</li> <li>• Length of time between sample collection and notification of a positive test result for PCR testing.</li> <li>• Detection rates of SARS-CoV-2 Variants of Concern (VOCs), in total and over time</li> <li>• Detection rates as a function of the 'daycare center' group composition (proportion of study participants, proportion of Group 1 participants)</li> <li>• Proportion of positive serologic tests overall (children/child care staff), correlation of positive PCR and seroconversion between first and second serologic testing. This is a control for effectivity of surveillance concepts</li> </ul> <p><u>Efficiency</u> (evaluation of economic efficiency):</p> <ul style="list-style-type: none"> <li>• Costs for material and tests of asymptomatic participants (direct costs)</li> <li>• Quantification of the influence of pooling on the test costs</li> <li>• Costs of retesting positive antigen rapid tests of asymptomatic participants with PCR</li> <li>• Transport costs (sample collection for laboratory)</li> <li>• Parents' estimate of the average time spent sampling</li> </ul> <p><u>Scalability</u> (evaluation of further usability):</p> <ul style="list-style-type: none"> <li>• Extrapolation of the number of participants, test consequences, and costs for all daycare centers in Wuerzburg</li> <li>• Cost-benefit assessment</li> </ul> |
|--|-------------------------------------------------------------------------------------------------------------------------------------------------------------------------------------------------------------------------------------------------------------------------------------------------------------------------------------------------------------------------------------------------------------------------------------------------------------------------------------------------------------------------------------------------------------------------------------------------------------------------------------------------------------------------------------------------------------------------------------------------------------------------------------------------------------------------------------------------------------------------------------------------------------------------------------------------------------------------------------------------------------------------------------------------------------------------------------------------------------------------------------------------------------------------------------------------------------------------------------------------------------------------------------------------------------------------------------------------------------------------------------------------------------------------------------------------------------------------------------------------------------------------------------------------------------------------------------------------------------------------------------------------------------------------------------------------------------------------------------------------------------------------------------------------------------------------------------------------------------------------------------------------------------------------------------------------------------------------------------------------------------------------------------------------------------------------------------------------------------------------------------------------------------------------------------------------------------------------------------------------------|

|                      |                                                                                                                                                                                                                                                                                                                                                                                                                                                                                                                                                                                                                                                                                                                                                                                                                                                                                                                                                                                                                                                                                                                                                                                                                                                                                                                                                                        |
|----------------------|------------------------------------------------------------------------------------------------------------------------------------------------------------------------------------------------------------------------------------------------------------------------------------------------------------------------------------------------------------------------------------------------------------------------------------------------------------------------------------------------------------------------------------------------------------------------------------------------------------------------------------------------------------------------------------------------------------------------------------------------------------------------------------------------------------------------------------------------------------------------------------------------------------------------------------------------------------------------------------------------------------------------------------------------------------------------------------------------------------------------------------------------------------------------------------------------------------------------------------------------------------------------------------------------------------------------------------------------------------------------|
|                      | <ul style="list-style-type: none"> <li>Modeling of the scalability as a function of participant rate, background incidence, test frequency, detection rate detection method, using state-based modeling methods</li> </ul>                                                                                                                                                                                                                                                                                                                                                                                                                                                                                                                                                                                                                                                                                                                                                                                                                                                                                                                                                                                                                                                                                                                                             |
| Statistical analyses | <p>To estimate the primary endpoints, the 95 % confidence interval is estimated using the Wilson score method. The significance level for all analyses is set to 5 %. Since these are purely exploratory analyses, the significance level is not adjusted for multiple testing. The data are analyzed stratified by daycare center children/parents and child care staff. Initially all end points are described descriptively (frequency (percentage), mean value (SD) or median (IQR)). The development of psychosocial factors is evaluated overall and, if the number of cases is large enough, stratified by the participant group. This is done using tests for connected samples such as McNemar, ANOVA, and Friedmann. Potential predictors on the longer-term acceptance rate (drop-out rate) will be examined overall and stratified by the participant group. First in a descriptive manner using suitable tests such as Chi<sup>2</sup> test and later, if the number of cases is large enough, using logistic regression (adjusted for the participant groups). The analyses are effected by means of SAS, R or SPSS.</p>                                                                                                                                                                                                                                 |
| Time line            | <p><u>Study period:</u> 2021-04-01 to 2021-12-31 (9 months)</p> <p>Start of Wue-KiT-Ta-CoV 2.0 if possible directly after completion of the Wue-KiT-Ta-CoV surveys on site in the daycare centers (there until March 2021). Respiratory sample collection for Wue-KiT-Ta-CoV 2.0 in daycare centers is expected to last 12 weeks in the period of April to July 2021.</p> <p><u>Reporting:</u></p> <ul style="list-style-type: none"> <li>- Status report April 2021 ('Manual')</li> <li>- Status report May 2021</li> <li>- Status report June 2021</li> <li>- Project report July/August 2021 ("meaningful")</li> <li>- Final report Sep 2021 (provisional; main evaluation)</li> <li>- Final report Dec 2021 (final evaluation)</li> </ul> <p>Plus weekly <u>short reports</u> in regards to:</p> <ul style="list-style-type: none"> <li>- N included children (only during recruitment phase)</li> <li>- N documented tests per week</li> <li>- Cumulative since project start:             <ol style="list-style-type: none"> <li>Positive tests (pool/individual tests mouthwash, documented antigen rapid tests)</li> <li>If appropriate, correct-positive (after PCR confirmation of antigen rapid tests)</li> <li>If necessary, false-negative tests after PCR confirmation (only possible for participant group 1 tested in parallel)</li> </ol> </li> </ul> |

127

128



## 1.5 Flow diagram order of study course/recruitment/data acquisition

Würzburger children support study during the COVID-19 pandemic, Part II:  
 Surveillance of SARS-CoV-2 infections in daycare centers by means of twice weekly mouthwash submission for pooled PCR and/or antigen rapid testing at home

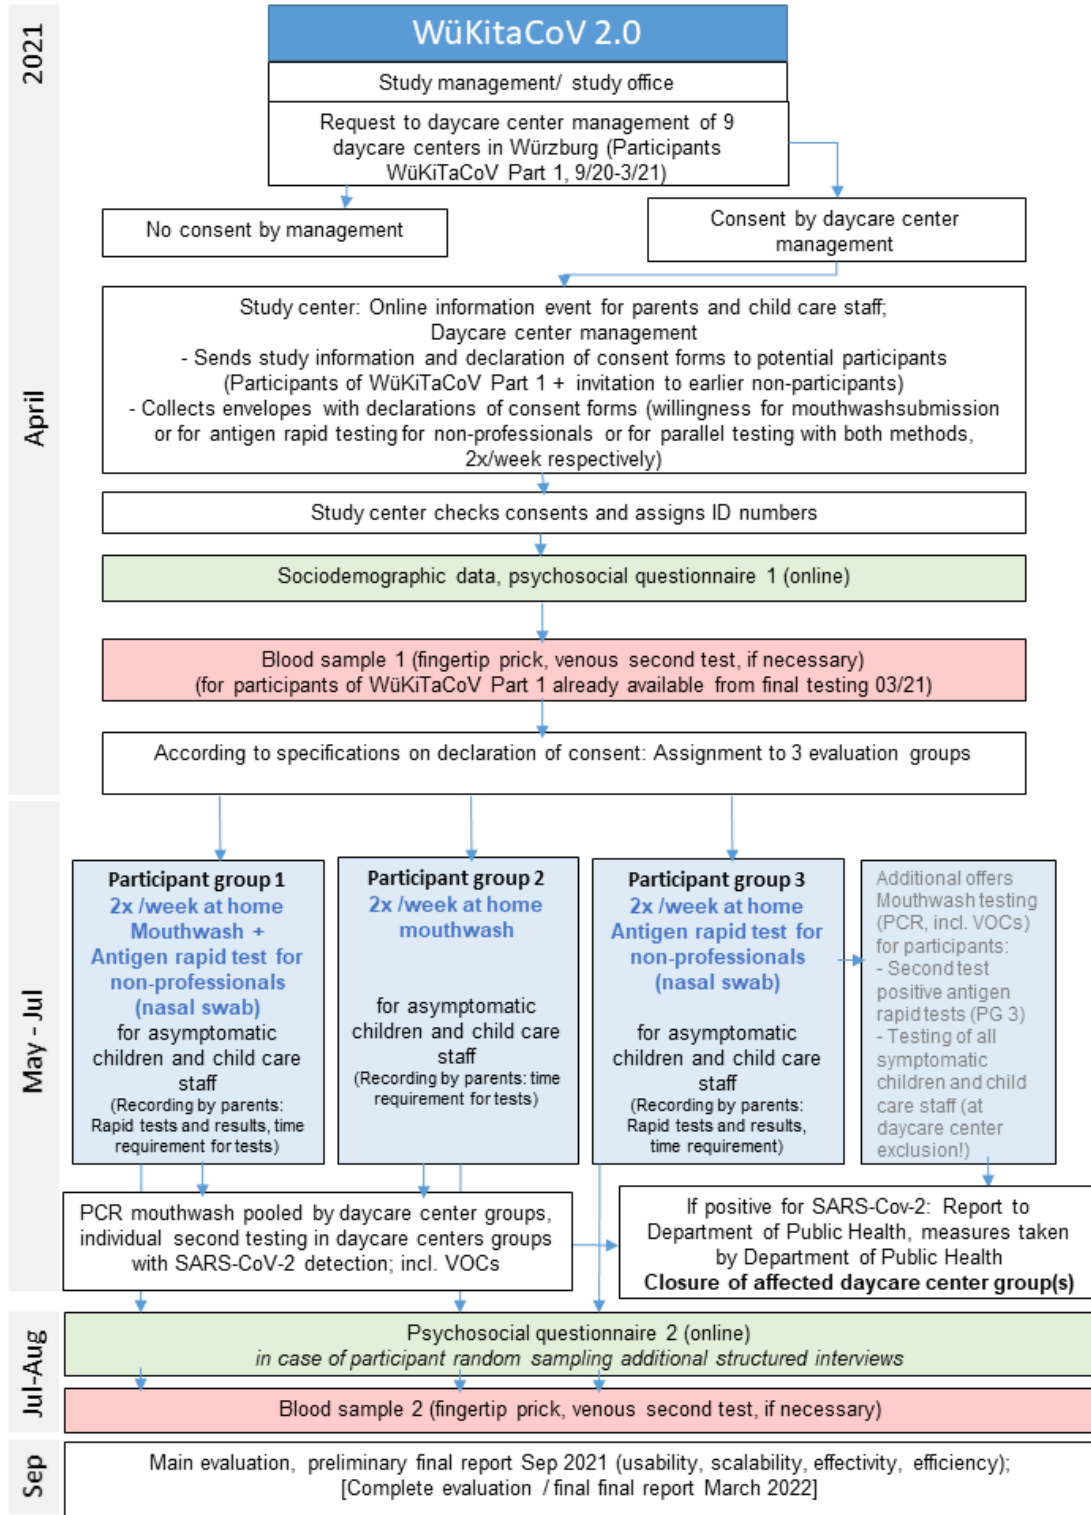

## 1.6 Background: COVID-19 and childcare

### SARS-Cov-2/COVID-19 pandemic

Since December 2019, the new coronavirus SARS-CoV-2 has been spreading worldwide. On March 11, 2020, the WHO officially classified the outbreak as a pandemic. The SARS-CoV-2 virus belongs to the coronavirus family. Human-pathogenic coronaviruses usually cause upper respiratory tract infections in humans. The clinical manifestation spectrum ranges from normal cold symptoms to severe disease courses with possible inflammatory-cardiovascular and neurological implications <sup>1</sup>.

The disease caused by SARS-CoV-2 is referred to as COVID-19 ("Coronavirus-Disease-2019") According to information from the Robert Koch Institute, the courses of the disease are non-specific, diverse, and vary widely – this can range from asymptomatic courses to severe pneumonia with lung failure, multi-organ involvement, and death. From the cumulative cases recorded in the European Surveillance System (TESSy) with symptom information (n = 100,233 from 12 European countries; as of 2020-04-21), the most common symptoms reported are impaired taste and smell, fever, cough, and sore throat <sup>2</sup>. The Epidemiologic Bulletin of 2020-04-23 reported that 8-10% of the cases reported in Germany are hospitalized – with the hospitalization in children being very rare. Overall, children and adolescents are less likely to develop COVID-19 compared with adults. And those who do develop the disease predominantly show mild, uncomplicated upper respiratory tract infections while severe complications are rare <sup>3</sup>.

After an initial spread of the virus in Asia, the WHO European Region has been the epicenter of the pandemic since mid-March 2020. The European Region accounted for 63 % of global mortality due to the virus as of April 28, 2020 <sup>4</sup>. Meanwhile, the majority of new diagnoses are made in Russia, Central and South America, and the United States. The epidemiological situation in Africa is largely unclear.

Since fall 2020, the worldwide and increasing spread of several SARS-CoV-2 virus variants of concern ("Variants of Concern," VOCs) with increased transmissibility and, in some cases, still unknown virulence has been observed. This further complicates the epidemiological situation ([www.rki.de](http://www.rki.de)).

The global outbreak of SARS-CoV2 has made dramatically clear that new infectious diseases can present significant and drastic challenges at any time, even to industrialized countries with excellent medical infrastructure. The fight against the pandemic in Germany was accompanied by drastic measures that had a significant impact on people's daily lives. Examples of such measures are the cancellation of major events, substantial targeting of inpatient care towards COVID-19, worldwide travel warnings issued by the German Federal Foreign Office, widespread curfew and contact restrictions, widespread closures of stores and catering establishments, and the introduction of compulsory face masks in many areas of public life.

## 172 **Effects of the COVID-19 pandemic on childcare**

173 The measures affecting the care of children are particularly drastic. They have significant  
174 psychosocial consequences both for the children and for the families. Relevant professional  
175 associations therefore pointed out that the closure of daycare centers, children's  
176 playgrounds, schools and sports facilities results in the deprivation of essential prerequisites  
177 for healthy physical, mental and social development <sup>5</sup>: It has been argued that, since the  
178 course of the disease in children and adolescents is usually mild, school closures are not  
179 primarily intended to protect children but to contain the pandemic and ultimately to protect  
180 the vulnerable elderly population. It has also been pointed out that school closures contradict  
181 children's right to education (United Nations Convention on the Rights of the Child, Article 28)  
182 <sup>6</sup>. In particular, in view of the need to simultaneously care for children at home and meet work  
183 obligations while working remotely, parents are also sometimes unable to adequately fulfill  
184 either their professional responsibilities or care for their children, or both. As a result, the  
185 closure of childcare facilities and schools also has a significant economic impact.  
186 Furthermore, in many places support and assistance services (youth welfare offices or social  
187 institutions) are largely absent for families because of the distances involved. Outreach  
188 services can no longer be guaranteed. Youth welfare offices cannot adequately fulfill their  
189 role as guardians of children. And there is an increased risk that children's well-being will be  
190 endangered.

191

## 192 **Clinical manifestation of SARS-CoV-2 infection in children**

193 SARS-CoV-2 infection usually results in milder clinical symptoms in children than in adults:

194 A systematic review based on 14 publications from China showed that of 2228 children, only  
195 6 % had a severe course (72 % mild, 22 % moderate). Only two deaths were described in  
196 the papers analyzed (one 14-year-old child, one newborn) <sup>7</sup>. A further systematic review  
197 based on 45 published case series and case reports shows that children account for 1-5 % of  
198 the diagnosed COVID-19 cases and generally have a milder disease course than adults.  
199 Deaths in children were only found in isolated cases in this work as well <sup>8</sup>.

200 A multi-systemic inflammatory disease (Kawasaki-like syndrome) with circulatory dysfunction  
201 and macrophage activation syndrome has been described in children as a rare severe  
202 complication of a SARS-CoV-2 infection <sup>9,10</sup>.

203 Also first analyses from Europe (Italy) confirm a generally mild course of SARS-CoV-2  
204 infection in children <sup>11</sup>. In an analysis of 168 laboratory-confirmed pediatric cases (median:  
205 2.3 years), the majority of whom were hospitalized (67.9 %) and had comorbidities to a high  
206 proportion (19.6 %), only two of the children received intensive care.

207 In Germany, 0.1 % of all recorded COVID-19 cases were between 0 and 4 years old, and  
208 0.23 % were between 5 and 14 years old. The age-related incidence for 0 to 14-year-olds  
209 ranged from 45 to 57/100,000 population. It was thus significantly lower than in all other age  
210 groups (167-384/100,000 population) <sup>12</sup>. The Robert Koch Institute (RKI) concludes that in  
211 the majority of available studies, children are less likely to be affected by a SARS-CoV-2  
212 infection than adults. According to the RKI, the symptoms of the disease often seem to be  
213 less pronounced in children than in adults. And according to initial studies, asymptomatic  
214 courses are also relatively common (in up to 28 % of the cases).

215

## 216 **Role of children and daycare centers in the spread of SARS-CoV-2**

217 The role of children in the spread of SARS-CoV-2 has not yet been finally clarified. In reports  
218 of clusters in France and in Australia, no transmission from infected children to further adults  
219 or children was observed<sup>13,14</sup>. In a large surveillance study in Iceland, children were affected  
220 less frequently in both a risk population (6.7 versus 13.7 %) and a population screening (0 %  
221 vs. 0.8 %) than adults<sup>15</sup>. Similar results were seen in the study of 2812 residents of the town  
222 of Vo (Veneto, Italy) during an outbreak: There was no case here in children younger than 10  
223 years, while SARS-CoV-2 was detected in 2.8 % of adults<sup>16</sup>. In a Japanese study examining  
224 suspected cases and contacts, the attack rate is lowest in the age groups of 0-10 and 10-20  
225<sup>17</sup>. Observations from Sweden, where child care was restricted and yet children are  
226 underrepresented among those detected infected, may also indicate a lower rate of infection  
227 among children. Authors of a systematic review concluded - with a poor data base - that  
228 school closures made little contribution to combating the SARS-CoV-2 pandemic<sup>18</sup>.

229 Other analyses show, however, that children are infected with the same frequency as adults  
230<sup>19</sup>. Early in the course of the pandemic, it was also suggested that children might be efficient  
231 carriers of SARS-CoV-2 because of a lack of symptoms and concurrent viral replication.  
232 Appropriately, the efficient spread of SARS-CoV-2 in a school in France was described<sup>20</sup>. In  
233 this school with predominantly older pupils, the attack rate was 40.9 % for students/teachers  
234 and 10.9 % for relatives. Analysis of viral detections from respiratory materials did not  
235 indicate that the viral load in the upper airways of children with evidence of SARS-CoV-2 is  
236 quantitatively lower than that of adults to a relevant extent<sup>21</sup>. The authors therefore doubt a  
237 lower infectivity of children. They do indicate, however, that due to the lower respiratory  
238 volume and the lower force of the cough bursts of infants, the infectivity of children might be  
239 lower despite the same viral load.

240 Overall, the prevailing view is that children usually show asymptomatic or predominantly mild  
241 courses of COVID-19<sup>6</sup>. Whether they are also carriers of SARS-CoV-2 more rarely has not  
242 yet been determined. A modeling study on the effectivity of sociopolitical control and  
243 abatement measures against SARS-CoV-2 transmission in 41 (mostly European) countries,  
244 initially published as a pre-print in June 2020, comes to the surprising conclusion that -  
245 compared with other measures such as business closures and curfews - school closures  
246 were, on average, the most effective measure for reducing the transmission rate<sup>22</sup>.

247

## 248 **Measures to fight the COVID-19 pandemic in child care settings**

249 All schools and daycare centers in Bavaria were closed on March 16, 2020 to contain the  
250 spread of SARS-Cov-2. Basis is the assumption that oligo-symptomatic and asymptomatic  
251 children are also infectious and contribute to the spread of the virus in the community by  
252 attending community facilities. The scientific basis for this is almost exclusively based on  
253 analyses of influenza outbreaks and may not be applicable to the SARS-CoV-2 situation<sup>6</sup>.

254 After the state-wide closures, only emergency care was maintained – which was available to  
255 a widely varying extent. The regulations governing the right to use emergency care have also  
256 been changed multiple times over time. Facilities in which SARS-CoV-2 has been detected  
257 have as a rule been closed by the respective Department of Public Health for at least two  
258 weeks. Reopening of daycare centers took place step-by-step in May, June and July 2020.  
259 The reason for the hesitant reopening is, in particular, that common and proven protective  
260 measures cannot be implemented in daycare centers. This encompasses, in particular,

261 systematically maintaining a distance of 1.5 m from other people as well as wearing masks  
262 covering mouth and nose coverings – especially in situations where distancing is not  
263 possible. Neither of these measures can be reasonably implemented – especially when it  
264 comes to the care of young children.

265 Since the implementation of hygiene concepts is very difficult in childcare facilities, the  
266 effective and reliable surveillance of children in these facilities plays a significant role.  
267 However, even close monitoring approaches that are simple and feasible for adults cannot  
268 be applied directly to children. This is because of their lack of comprehension and  
269 cooperation. Various concepts for effective monitoring of children in childcare facilities in  
270 Germany are currently being developed (Hübner et al. Teststrategien zur COVID Diagnostik  
271 in Schulen [Test strategies for COVID diagnostics in schools], 2021-02-28;  
272 <https://dgpi.de/publikationen/covid-19-publikationen/>). Depending on the prevalence of  
273 COVID-19 in the population, such measures may need to be implemented extensively and  
274 over longer periods of time in the future. In addition to the high effectivity of a monitoring  
275 measure for the detection of SARS-CoV-2 infections, the longer-term acceptance, in addition  
276 to the initial acceptance, of the measure by all stakeholders (children, family, child care staff,  
277 funding institution) is crucial here. A theoretically highly effective measure for the detection of  
278 infections, such as daily swabs of all daycare center children and testing by means of PCR,  
279 will not lead to the desired success if there is a lack of acceptance by those involved.  
280 Conversely a method that is expected to have a high level of acceptance, such as  
281 surveillance, not of the daycare center children themselves but of their household members  
282 for respiratory symptoms, or the use of (possibly less sensitive) saliva tests, could also show  
283 too little effectivity with regard to the goal of preventing the spread of infection in the daycare  
284 center, Therefore the feasibility and acceptability of various potential monitoring measures  
285 should first be evaluated before evaluating the effectivity.

286 At the end of February 2021, the first antigen (AG) rapid tests for self-testing "for non-  
287 professionals" for SARS-CoV-2 were approved in Germany. Those tests detect infectious  
288 individuals well within approximately 15-30 min, especially in the case of high viral loads.  
289 Their usage for extensive screening of asymptomatic children in schools and childcare  
290 facilities (KiTas) is, however, controversial, due to the expected unacceptably high numbers  
291 of false negative and false positive results. It is rejected by the leading pediatric societies in  
292 Germany and extensive use is only recommended under close scientific monitoring (Hübner  
293 et al. Teststrategien zur COVID Diagnostik in Schulen [Test strategies for COVID diagnostics  
294 in schools], 2021-02-28; <https://dgpi.de/publikationen/covid-19-publikationen/>). Furthermore,  
295 in this position paper the pediatric societies recommend the scientific evaluation of innovative  
296 concepts, such as pool testing of respiratory materials, which can be obtained in an  
297 uncomplicated way by non-professionals, and their evaluation also with regard to logistic  
298 feasibility and cost-effectivity for PCR-based testing strategies (highest specificity and  
299 sensitivity).

300

### 301 **Objective of the previous feasibility study (Wue-KiT-Ta-CoV)**

302 In the feasibility study 'Wue-KiT-Ta-CoV' funded by the German Federal Ministry of Education  
303 and Research (BMBF) as part of InfectControl 2020 (CoVMon 03COV16A project; study  
304 direction Prof. Kurzai and Prof. Liese), four different PCR-based concepts for the surveillance  
305 of SARS-CoV-2 infections and their spread in daycare center children and child care staff are  
306 tested for acceptance by the participants and their practical feasibility and compared with

307 each other: in Module 1, 2x/week resp. in Module 2 1x/week a nasal swab (mid-turbinate  
308 swab) is performed by medically trained study staff in asymptomatic participants in daycare  
309 centers, in Module 3 2x/week mouthwash is submitted in daycare centers for PCR testing, in  
310 Module 4 no testing is performed in daycare centers, but symptomatic daycare center  
311 children, child care staff and their household members are offered PCR testing by means of  
312 throat swab. In addition to the acceptance of the respective measures and their technical and  
313 logistical implementation, the psychosocial impacts of the various surveillance protocols will  
314 also be assessed through accompanying interviews with children, families, and care staff.  
315 And the cost per daycare center child is calculated on the basis of direct costs (material,  
316 personnel, testing), and seroprevalence tests for SARS-CoV-2 antibodies are performed.

317 The overarching goal of the Wue-KiT-Ta-CoV feasibility study is to identify surveillance  
318 concepts with good acceptance.

319 A total of 9 daycare centers in the Wuerzburg area are involved. The practical  
320 implementation in the daycare centers in Wuerzburg began in October 2020 and will be  
321 completed in March 2021. The study period included 3 months of respiratory sampling. The  
322 last respiratory sampling occurred at the end of February 2021. The main evaluation phase  
323 begins in April 2021. The first data on acceptance are available.

324 First results were submitted as congress abstracts at the end of February/beginning of March  
325 2021. In total the parents of 442 (57 %) of 772 eligible daycare center children (1-6 years),  
326 and 150 (82 %) of 182 child care staff agreed to participate in the Wue-KiT-Ta-CoV respiratory  
327 surveillance. The highest initial acceptance was for mouthwash collection (67 % of parents,  
328 86 % of child care staff). A supplemental survey of nonparticipants revealed the most  
329 common reason for declining study participation or respiratory sampling was the fear of a  
330 negative experience for the child. Only 3 % of nonparticipants expressed 'Corona  
331 skepticism'. A relevant proportion of the child care staff expressed strong concern about  
332 infecting others with SARS-CoV-2 (42 %) or becoming severely ill with it themselves (20 %).  
333 The drop-out rate amounted to less than 5 % during the 12-week screening period in the  
334 mouthwash sampling. In all modules, 70 %-90 % of participants indicated a high or very high  
335 willingness to continue surveillance, if necessary, using 2x/week mouthwash sample  
336 collection.

337

### 338 **Motivation for the pilot study proposed here (Wue-KiT-Ta-CoV 2.0)**

339 The practical implementation of Wue-KiT-Ta-CoV in the daycare centers comes to an end at  
340 the end of March. In the follow-up study Wue-KiT-Ta-CoV 2.0, the practical implementation of  
341 respiratory sampling will be resumed again in the relevant Wuerzburg daycare centers from  
342 April 2021. This will happen while retaining most of the accompanying examinations,  
343 however, with a new test concept based on the results of the first study.

### 344 **Wue-KiT-Ta-CoV 2.0 ...**

345 a) ... Is based on the initial participant preference shown in Wue-KiT-Ta-CoV for mouthwash  
346 submission for PCR as a screening tool in daycare centers,

347 b) .... In addition addresses the current situation regarding the availability of non-professional  
348 antigen rapid tests, which changed at the end of February 2021,

349 c) ... Also addresses the current recommendations of the pediatric specialty societies (2021-  
350 02-28) regarding the evaluation of innovative strategies (pooling, easy-to-obtain respiratory  
351 samples),

352 d) .... Considers the changed situation since December 2020 regarding the rapid spread of  
353 VOCs also now in Germany.

354 e) ... May also evaluate, if appropriate, the initial impacts of the changed situation regarding  
355 the rapid SARS-CoV-2 vaccination of daycare center staff. Vaccinations have been possible  
356 since the end of February 2021.

357

358 **Wue-KiTa-CoV 2.0** is intended to ...

359 ... Evaluate in a comparative approach 2x/week mouthwash collection and/or 2x/week  
360 antigen rapid testing 'for non-professionals';

361 ... In the process initially analyze mouthwash samples as pooled by means of PCR, and only  
362 if the pooling result is positive should reserve samples be retested individually by means of  
363 PCR.

364 ... Record the incidence of SARS-CoV-2 infections including VOCs in daycare centers,  
365 absolutely and in children in relation to the background incidence of the corresponding age  
366 group;

367 ... Evaluate the psychosocial effects of the vaccinations of child care staff.

368

369 Overarching target criteria are the evaluation in terms of "Usability", "Effectivity", "Efficiency"  
370 and "Scalability" (broader applicability).

371 In regards to the last point, a "manual" for usage in the daycare centers outside of a study  
372 should also be created. This could help to prepare the planning of a possible follow-up study  
373 in case of a favorable evaluation of the target criteria (if necessary, scientific support of a  
374 "roll-out" of the suitable test strategy in trans-regional application).

375

376 **Objective of a possible subsequent study**

377 In the case of a regional or trans-regional 'roll-out' decided by the health authorities based on  
378 the results of the pilot study, the chosen surveillance concept should be further optimized  
379 and further reviewed in regards to its effectivity in the early detection of SARS Cov-2  
380 infections in daycare center children. The ultimate goal is to interrupt the spread of the virus  
381 in the daycare centers at an early stage, thus maintaining child care in the daycare centers  
382 as continuously as possible. For example, daycare centers in regions without implementation  
383 of a surveillance concept could serve as a control group in a 'roll-out'.

## 384 **1.7 Questions Wue-Kita-CoV 2.0**

385

386 The following question is to be answered in particular as part of the pilot study described  
387 below:

- 388 I. Do the children in care, their parents and the child care staff accept the SARS-CoV-2  
389 surveillance approaches which are based on regular, easy-to-perform self-administer  
390 sampling of child care staff and daycare center children at home? Both initially and in  
391 longer-term implementation ('Usability')? To what extent does the acceptance differ  
392 between mouthwash collection for PCR testing and antigen rapid testing for non-  
393 professionals?
- 394 II. How effective are such approaches in terms of detecting SARS-CoV-2 in daycare  
395 centers, depending on the type of testing used and the background incidence  
396 ("Effectivity")?
- 397 III. What is the cost-benefit ratio, especially under the inclusion of pooling of mouthwash  
398 samples for PCR analyses ("Efficiency")?
- 399 IV. How suitable are such concepts for trans-regional application ("Scalability")?
- 400 In addition, the following questions are, amongst other, addressed:
- 401 V. How frequently can SARS-CoV-2 VOCs be detected in asymptomatic participants -  
402 do VOCs show altered propagation behavior in daycare centers?
- 403 VI. How often does systematic testing of asymptomatic daycare center children by  
404 parents using the antigen rapid non-professional tests lead to false-positive or false-  
405 negative results, compared to mouthwash pooling (at a positive test followed by  
406 individual testing)?
- 407 VII. How much does the detection rate depend on the percentage of surveillance  
408 participants in the daycare center group?
- 409 VIII. What sociodemographic factors are potential *predictors of longer-term participant*  
410 *acceptance* for surveillance approaches to child care institutions?
- 411 IX. What are the *psychosocial effects* of long-term infection monitoring on children, their  
412 families, and child care staff?
- 413 X. How high is the *SARS-CoV-2 seroprevalence* among children and child care staff in  
414 Wuerzburg and how does it change over the study period?
- 415 XI. If appropriate: Does vaccination lead to an individually higher sense of safety and  
416 satisfaction for child care staff?
- 417

## 418 **1.8 Risk-benefit ratio**

419

420 Overall, the risks of the study for the participants are to be considered to be low.

421 The samplings are examinations in which normally only minor side effects are to be  
422 expected. This includes an unpleasant sensation during the nasal swab (antigen rapid test)  
423 or a possible (optional) throat swab and a small hematoma resulting from the fingertip prick.

424

425 Risks when collecting the nasal swab:



426 Relevant complications of nasal swab collection in antigen rapid tests approved for self-  
427 testing are very rare. There may be an unpleasant sensation when taking the sample. It is an  
428 objective of this study to determine to what extent the repeated collection of nasal swabs is  
429 tolerated by the children / child care staff. These are subjectively perceived as unpleasant in  
430 very different ways (see Study objectives).

431

432 Risks when collecting the mouthwash samples:

433 No relevant risks arise here, since only drinking water is used for rinsing, if necessary.

434

435 Risks associated with fingertip prick (additional measure):

436 In rare cases a hematoma may occur at the prick point and, very rarely, infection of the prick  
437 point may occur.

438

439 Risks associated with venous blood sampling (pertains only to children/child care staff with  
440 abnormal and borderline point-of-care diagnostic findings from the fingertip):

- 441 • **Bruising (hematoma)** at the prick site due to further injury of the pricked vein or  
442 surrounding vessels
- 443 • In rare cases, **injury to arteries** and resulting bleeding
- 444 • In very rare cases, **infection** of the prick point
- 445 • In very rare cases, **injury to nerves** with loss of sensation and/or movement, and a  
446 very low risk of permanent damage.

447 All blood collections are performed by medical personnel under the supervision of a  
448 physician.

449 Infection risk through SARS-CoV-2 for the study population

450 The initial infection risk of the study population is identical to that of all children cared for in  
451 daycare centers in Wuerzburg. The implementation of the surveillance concepts is expected  
452 to result in earlier and more efficient detection of emerging cases. This may result in  
453 secondary risk of infection (infection through transmission of SARS-CoV-2 in the daycare  
454 from an unrecognized infected person) possibly being lower for the study population than in  
455 facilities not participating in the study.

456 The epidemiological situation in regards to the spread of SARS-CoV-2 is monitored at all  
457 times. Any detection of SARS-CoV-2 in a sample collected as part of the study will be  
458 reported to the appropriate Department of Public Health in accordance with regulatory  
459 requirements. The Department of Public Health makes the decision in each case to what  
460 extent quarantine measures and closures of the daycare or individual groups in the daycare  
461 are necessary. If the virus is detected in one of the study daycare centers, the parents and  
462 child care staff will be informed immediately about the need for close self-observation and  
463 immediate testing in case of symptoms. An advisory hotline by telephone in the study center  
464 is available for all custodians and child care staff.

465 No additional risk is created to and in the daycare centers through the testing conducted as  
466 part of the study, as all sampling/testing, which may involve infectious aerosols, is conducted

467 at home. Mouthwash samples will be transported in suitable transport containers for  
468 potentially infectious material by parents to the daycare centers, where they will be collected  
469 for laboratory testing. Testing is performed in a timely manner to ensure notification in the  
470 event of infection prior to the next scheduled daycare visit. The used non-professional  
471 antigen rapid tests should be disposed of by the parents in accordance with the  
472 manufacturer's instructions.

473 As part of the study, all symptomatic children and child care staff who are excluded from  
474 attending daycare centers due to the Bavarian hygiene framework for daycare centers will  
475 also be offered testing by means of throat swab at the testing center at the University  
476 Hospital of Wuerzburg.

477

478 Benefit:

479 So far there is no foreseeable end to the SARS-CoV-2 pandemic. Predictable, reliable, and  
480 robust child care plans must be developed accordingly. These concept variants can support  
481 decisions regarding the installation of measures in the event of renewed local or trans-  
482 regional foci of infection.

483 In the present pilot study, different surveillance concepts are compared in asymptomatic  
484 daycare center children or child care staff. In addition, all symptomatic participants (daycare  
485 center children and child care staff) will also be offered throat swab testing if defined  
486 symptoms are present. This will make it possible to compare the feasibility and acceptability  
487 of the different approaches. The aim is then to develop optimal concepts for regional and  
488 trans-regional surveillance of daycare centers during the SARS-CoV-2 pandemic in the  
489 medium and long term and to further evaluate their effectivity. The results also allow the  
490 definition of realistic surveillance concepts for future pandemic respiratory viruses.

491 Over its course the study will compare mouthwash submissions for PCR testing with  
492 commercially available antigen rapid tests for home ("non-professional") testing. These  
493 antigen rapid tests show a false-positive result in about 1-2 % of the tests. With the effect  
494 that daycare center children and daycare center child care staff are unnecessarily  
495 discouraged from attending the daycare center. The study here allows a better estimation on  
496 the effectivity of the use of such rapid tests in asymptomatic individuals.

497 The systematic testing means that there is an increase in the overall safety for the daycare  
498 center children as well as for the child care staff. The availability of medical contact persons  
499 within the framework of a study hotline, ensures the greatest possible safety for the  
500 custodians and child care staff.

501 Of particular importance is the fact that the study design, through early detection of SARS-  
502 CoV-2 infection, may allow child care to be upheld even if an isolated case occurs. Although  
503 the decision to close a facility is made solely by the Department of Public Health department  
504 independently of the study, the likelihood of spontaneous center closures which can result in  
505 uncertainty and need for child care at home can be reduced.

506 In order to maintain child care initially when an individual case occurs, the following  
507 procedure of the local Department of Public Health would be conceivable, for example, as a  
508 model upon the first detection of an infection in a participating daycare center in the context  
509 of this surveillance study:

510 Department of Public Health:

511 - Orders appropriate isolation and quarantine measures for the affected child in accordance  
512 with currently existing regulations,

513 - The affected daycare center group and all other daycare center groups of the facility remain  
514 open for the time being

515 Possible modifications of the study surveillance for this situation would be:

516 The test frequency for any additional study participants from the affected daycare group will  
517 be increased in the following 2 weeks (3 instead of 2 tests/week, also additional smears if  
518 necessary). Test frequency for study participants from other daycare center groups will not  
519 be increased.

520 - The non-study participants from the affected daycare center group will be offered additional  
521 testing (swabs)

522 Department of Public Health:

523 - Only in the event of further children or child care staff testing positive at the same time or in  
524 succession would a decision then be made about any additional testing and quarantine  
525 measures that may be necessary. This includes daycare center group closures/daycare  
526 center closures.

527 Such an approach would require that the Department of Public Health informs not only the  
528 management of the daycare center but also the parents of all daycare center children and  
529 the daycare center child care staff in advance about the occurrence of the case and the  
530 intention of keeping open of the affected daycare center group. This would ensure that  
531 everyone can decide individually to suspend daycare attendance or care work for the time  
532 being, if necessary, due to their own concerns. At this moment, it is not yet clear whether  
533 legal certainty exists for such a possible approach by the Department of Public Health. If the  
534 Department of Public Health adopts such an approach or a similar one, a timely adjustment  
535 to the study protocol/surveillance regarding testing frequency/additional swabs would be  
536 possible in this regard.

537 From an infection epidemiology perspective, a potential benefit of the pilot study is also the  
538 early identification of potentially infectious children/child care staff. This allows chains of  
539 infection to be interrupted efficiently and prevents further illnesses.

540 As a result of the study, it will also be possible to make initial statements about which of the  
541 investigated surveillance concepts for childcare centers are suitable for longer-term use, in  
542 terms of acceptance, practical feasibility, effectivity, and efficiency. In addition, a 'manual' (in  
543 the sense of "Standard Operating Procedures") is to be developed, which could be suitable  
544 for the regional and trans-regional application of the surveillance concepts in the field of  
545 public health ("roll out").

---

## 546 2 STUDY OBJECTIVES

547

548 In the pilot project Wue-KiT-Ta-CoV 2.0, different surveillance concepts (mouthwash collection,  
549 antigen rapid tests for home use) for the early detection of SARS-CoV-2 in daycare centers  
550 are being evaluated as examples in the Wuerzburg area. Central elements of surveillance  
551 are sample collection/testing 2x/week of asymptomatic daycare center children (by the  
552 parents at home) and daycare center child care staff, as well as the testing of mouthwash  
553 samples initially pooled, with subsequent individual testing only if the pool is positive. The  
554 surveillance concepts will be evaluated primarily with respect to "usability" (assessment of  
555 suitability for use). This is the case in particular for initial and longer-term acceptance, and  
556 their "effectivity" as a screening tool for the early detection of SARS-CoV-2 infections.

557 Additionally, potential predictors of longer-term acceptance as well as the psychosocial  
558 impact of permanent monitoring on children, families, and child care staff will be examined in  
559 regards to "usability". Other objectives include evaluation in terms of cost-effectivity  
560 ("efficiency"). This means with regard to the relevant cost factors associated with each  
561 surveillance protocol, as well as the evaluation of broader applicability ("scalability"). In  
562 addition, further data will also be collected, for example frequency of detection of VOCs in  
563 daycare center children, seroprevalence data on daycare center children in the Wuerzburg  
564 area (as a control for the "effectivity" of testing). Data will also be collected on the proportion  
565 of child care staff vaccinated against SARS-CoV-2.

### 566 2.1 Primary hypothesis

567 [1] Usability: Screening for SARS-CoV-2 of asymptomatic children and child care staff in  
568 childcare centers (2x/week, by mouthwash and/or antigen rapid test) is initially  
569 accepted by the majority of parents/child care staff.

### 570 2.2 Secondary / further hypotheses

571 [2] Usability: Screening for SARS-CoV-2 of asymptomatic children and child care staff in  
572 childcare centers (2x/week, by mouthwash collection and/or antigen rapid test) is  
573 accepted by participants without a relevant drop-out rate over several months.

574 [3] Effectivity: Screening for SARS-CoV-2 of asymptomatic children and child care staff  
575 in childcare centers (2x/week, by mouthwash and/or antigen rapid test) allows early  
576 detection of SARS-CoV-2 infection in daycare centers.

577 [4] Effectivity: Pooling of mouthwash collection (PCR) with single testing in case of a  
578 positive pool is a more reliable method for early detection of SARS-CoV-2 infection in  
579 daycare centers than antigen rapid self-testing tests

580 [5] Usability: A long-term screening for SARS-CoV-2 of asymptomatic children and child  
581 care staff in childcare centers (2x/week, by mouthwash and/or antigen rapid test)  
582 increases the perception of safety and satisfaction among children, their families and  
583 the care staff.

584

---

## 585 **2.3 Study design and time line**

### 586 **2.3.1 Design**

587 Pilot study (open, multicenter, longitudinal)

### 588 **2.3.2 Time line**

589 In April 2021, information will be provided to staff and parents in the daycare centers already  
590 participating in Wue-KiT-Ta-CoV and consent will be obtained for Wue-KiT-Ta-CoV 2.0. The  
591 implementation is expected to start after the Easter holidays, and in parallel in all facilities.  
592 Practical implementation of the study in the daycare centers is expected to end at the  
593 beginning of the Summer vacations (Aug 2021). This will probably be after 12 weeks under  
594 surveillance.

595 The following bar chart provides an overview of the details of the study schedule and for the  
596 individual work steps.

597



## 601 3 STUDY POPULATION

### 602 3.1 Procedure for the selection of facilities

603 The study will be conducted at a total of 9 childcare facilities of the approximately 80  
604 corresponding facilities in the city of Wuerzburg that have already participated in the Wue-  
605 KiTa-CoV study. For logistical reasons, the pilot project preferentially included larger facilities  
606 ( $\geq 50$  children in care). The selection of the 9 facilities for the Wue-KiTa-CoV study was  
607 made in cooperation with the Youth, Family and Social Services Department of the City of  
608 Wuerzburg. In addition to the size of the facility, the selection criteria also included the  
609 approval of the facility management for the carrying out the study.

### 610 3.2 Inclusion criteria for test subjects at the facilities

- 611 - Daycare center children from 2 years of age (excluding after-school care children)  
612 who are cared for at one of the predefined daycare centers in Wuerzburg as well as  
613 child care staff at these centers
- 614 - Written consent of both parents/custodians or child care staff for 2x/week sampling  
615 (mouthwash samples, antigen rapid tests) of the daycare center child or child care  
616 staff, and documentation of sampling
- 617 - Optional: Written consent on further surveys (online surveys, and, if necessary,  
618 telephone interview, seroprevalence testing)

619

#### 620 Exclusion criteria for test subjects at the facilities

- 621 - Written consent missing
- 622 - Children aged  $<2$  years at the start of the study, after-school children
- 623 - Other daycare personnel without regular close contact with the daycare center  
624 children (such as kitchen help, janitor, etc.)

625

626

#### 627 Remarks

628

629 - SARS-CoV-2 vaccinations of child care staff are NOT an exclusion criterion (vaccinations  
630 are queried at the beginning and end of the study; vaccination status is considered in the  
631 analysis of seroprevalence data).

632

633 - Previous known SARS-CoV-2 disease in daycare center children or child care staff is NOT  
634 an exclusion criterion (will be queried at the beginning of the study; previous SARS-CoV-2  
635 disease will be considered in the analysis of seroprevalence data).

636

637 - Children with pre-existing conditions are NOT excluded from the start.

638

639

---

## 640 4 ORDER OF STUDY

### 641 4.1 Recruitment of study centers and test persons

642 The study is conducted in 9 selected daycare centers in Wuerzburg. The selection of  
643 daycare centers (independent of the organization supporting the facility) took place as part of  
644 the previous study (Wue-KiT-Ta-CoV) in close coordination with the social services department  
645 of the city of Wuerzburg after previous coordination with management and the owners.  
646 Potentially suitable daycare centers were pre-selected at that time and management was  
647 informed. The criteria for the selection of facilities at that time are listed under 3.1. If one of  
648 these 9 daycare centers does not want to participate in Wue-KiT-Ta-CoV 2.0, no further center  
649 is recruited.

650 Participating daycare centers will receive a short questionnaire at the beginning of Wue-  
651 KiT-Ta-CoV 2.0 to verify previous information on the structure and organization of the daycare  
652 center (number of children cared for, number of child care staff, number of groups, group  
653 size, number of child care staff / group, number of rooms, floor space, special hygiene  
654 concepts due to SARS-CoV-2).

655 The general aim is to recruit all children / care groups of a daycare center as subjects for  
656 Wue-KiT-Ta-CoV 2.0, if possible. An isolated recruitment of individual children or individual  
657 groups does not make sense because the interaction and the use of common areas as well  
658 as a possible stigmatization of individual test subjects. All potential participants (including the  
659 previous participants of Wue-KiT-Ta-CoV) will be contacted in writing regarding possible study  
660 participation. If initially less than 30% of the potential participants in one of the intended  
661 daycare centers would like to participate in the screening program, the study will be  
662 discontinued at this daycare center after this initial acceptance rate has been determined  
663 (discontinuation criterion). This is because a well-founded scientific evaluation of the  
664 screening program does not appear possible if only a few individual persons participate.  
665 (After the results of the previous study, this is considered unlikely in the current situation,  
666 because the majority of previous participants in a preliminary survey were very motivated to  
667 participate in continued surveillance using 2x/week mouth water rinsing collection, see Page  
668 20/21).

669 In addition, online information events about the study are provided. On a study website  
670 corresponding information and videos with instructions for the planned sample collection  
671 through the parents are stored.

672 If possible, the study is to be conducted at the predefined 9 daycare centers for the full 12-  
673 week period. The start of sampling should occur simultaneously, if possible, at all daycare  
674 centers after participant recruitment is complete. This way sampling at each center can occur  
675 during the same 12-week observation period (this is necessary because of the very dynamic  
676 nature of SARS-CoV-2 infections).

### 677 4.2 Information and consent

678 After approval by the owners and management of the daycare center to conduct the study  
679 Wue-KiT-Ta-CoV 2.0, information/consent forms on the planned study will be handed out to all  
680 families and child care staff by the daycare center management. The parents/custodians and



681 child care staff will be asked for consent to participate in the study (in addition separate  
682 consent parts for the participation in (i) respiratory sampling including its documentation, (ii)  
683 additional blood sampling for seroprevalence testing, (iii) for participants in the previous  
684 study, consent to include the already available data in the current study. Both  
685 parents/custodians of a child must consent to the sampling. Parents/custodians are asked to  
686 complete the consent forms and return them to the daycare center and to hand them in in a  
687 sealed envelope pre-addressed to the study center in the daycare center.

688 Participation is voluntary; parents and/or child care staff do not have to inform the daycare  
689 center about participation/non-participation in the study (exclusion of a possible  
690 disadvantage/discrimination). No information on the participation or findings with name will  
691 be shared with the daycare center by the study center.

692 If written consent is provided, basic sociodemographic data will be collected from participants  
693 (e.g., age and gender of daycare center child/child care staff, number of persons in the  
694 household of daycare center child/child care staff, parents' highest school-leaving  
695 qualification, etc.). In addition, some basic attitudes toward the SARS-CoV-2 pandemic  
696 (personal assessment of the danger of the pathogen, attitude toward SARS-CoV-2  
697 vaccination; for child care staff, SARS-CoV-2 vaccination status) are also queried.

698 Study staff will transport the sealed envelopes containing the consent forms to the study  
699 center. The documents are registered and archived at the study center. Each  
700 household/participant of the household is assigned a study ID number (pseudonymization).  
701 The parents of siblings in the daycare center receive a written notification to which daycare  
702 center child the respective ID number is assigned. The subsequent assignment of the  
703 pseudonymized online surveys to the respective child are therefore possible.

704 The share of potential study participants (children, child care staff) who do not participate  
705 because of missing consent is recorded.

706 The written consent for respiratory sampling and, if applicable, serological testing (blood  
707 sampling at the beginning and end of the study (see 6.4.3)), are recorded. Participation in  
708 surveys, interviews, or the serologic tests is not a mandatory requirement for the further  
709 participation in the respiratory surveillance.

710 For participating parents, child-friendly information about the aims and contents of the study  
711 will be provided in the respective surveillance groups, as far as this is reasonable and  
712 possible according to the age of the children.

### 713 **4.3 Interview and clinical examinations**

714 As part of the study three screening approaches (4.3.1) for surveillance of SARS-CoV-2 for  
715 asymptomatic daycare center children and child care staff are compared. The examinations  
716 take place simultaneously over a 12-week period in all facilities. Regardless of the type of  
717 screening, participating children, parents, and child care staff are interviewed regarding the  
718 psychosocial implications of the respective strategy (4.3.1), and children and child care staff  
719 who have also consented to blood collection will have their immune status assessed with  
720 regard to SARS-CoV-2 by serologic testing.

---

#### 721 4.3.1 Screening concepts (SARS-COV-2)

##### 722 4.3.1.1 Group 1: Mouthwash sample submission (for PCR) 2x/week plus simultaneously 723 2x/week nasal swab for antigen rapid testing at home

724 From all asymptomatic daycare center children and child care staff participating in Group 1, a  
725 mouthwash sample and a nasal swab is taken 2x/week at home (by parents in the case of  
726 children) and tested for SARS-CoV-2 (antigen rapid test at home according to manufacturer's  
727 instructions, mouthwash after submission to the daycare center in the laboratory by means of  
728 PCR, initially pooled, in case of a positive pool retested individually).

729 The laboratory result for the mouthwash sample is available within 24 h after collection.  
730 Participants are not notified if the result is negative in the pool or in the case of individual  
731 retests. The 'Case module' comes into effect in the case of a positive result (see 4.3.1.7).

732 In the case of the antigen rapid test at home the result can be read by the parents/child care  
733 staff after 15-30 minutes. If SARS-CoV-2 is detected in the antigen rapid test, the daycare  
734 center child or child care staff should not initially visit the daycare center. To confirm the  
735 antigen rapid test result a PCR test for SARS-CoV-2 from a throat swab should be performed  
736 on the same day. Appointments to this purpose can be made on the same day at the testing  
737 center of the University Hospital (test section building D20). Parents are asked to also hand  
738 in the mouthwash sample taken in the morning at the same time there for additional testing.  
739 The 'Case module' comes into effect in the case of a positive result (see 4.3.1.7). In case of a  
740 discrepant test result (positive antigen rapid test but negative PCR), another control smear  
741 test for the affected person is offered in the testing section of the University Hospital. This is  
742 made on the basis of individual counseling and taking into account exposure, symptoms, and  
743 symptoms in contact persons.

744 The submission of the mouthwash sample and the result of the findings are recorded in the  
745 laboratory/study center. Once a week the performance of all sample collections, the read  
746 result of the antigen rapid test, the presence/absence at the daycare center, the time  
747 estimated by the parents for sample collection/labeling/packaging as well as any 'workdays  
748 lost' due to a positive antigen rapid test are queried from the parents/child care staff.

749 The examinations take place for a 12-week period.

##### 750 4.3.1.2 Group 2: Mouthwash sample submission (for PCR) 2x/week

751 Of all asymptomatic daycare center children and daycare center child care staff participating  
752 in Group 2, a mouthwash sample is taken 2x/week at home (for children by their parents)  
753 and tested for SARS-CoV-2 (mouthwash sample after submission in the daycare center in  
754 the laboratory by means of PCR, initially pooled, in the case of a positive pool result,  
755 retesting is carried out individually).

756 The laboratory result for the mouthwash sample is available within 24 h after collection.  
757 Participants are not notified if the result is negative in the pool or in the case of individual  
758 retests. The 'Case module' comes into effect in the case of a positive result (see 4.3.1.7).

759 The submission of the mouthwash samples and the result of the findings are recorded in the  
760 laboratory/study center. Once a week the performance of all sample collections, the  
761 presence/absence at the daycare center, the time estimated by the parents for sample  
762 collection/labeling/packaging are queried from the parents/child care staff.

763 The examinations take place for a 12-week period.

764 4.3.1.3 Group 3: Antigen rapid testing at home 2x/week

765 Of all asymptomatic daycare center children and child care staff participating in Group 3, a  
766 nasal swab is taken 2x/week at home (for children by their parents) and tested for SARS-  
767 CoV-2 (antigen rapid test at home according to manufacturer's instructions).

768 In the case of the antigen rapid test at home the result can be read by the parents/child care  
769 staff after 15-30 minutes. If SARS-CoV-2 is detected in the antigen rapid test, the daycare  
770 center child or child care staff should not initially visit the daycare center.

771 For participants with a positive antigen rapid test, additional follow-up examinations are  
772 offered. To this purpose, the study center can be contacted and a same-day appointment for  
773 PCR testing via throat swab can be arranged at the test center of the University Hospital.  
774 This ensures that the PCR result is available before the next daycare center visit, as far s  
775 possible. There is no notification to the Department of Public Health of an antigen rapid test  
776 reported as positive without the confirmation of a PCR test.

777 After 24 h, the result of the additional PCR test performed is available and the 'Case module'  
778 comes into effect in the case of a positive result (see 4.3.1.7.). In case of a discrepant test  
779 result (positive antigen rapid test but negative PCR), another control smear test for the  
780 affected person is offered in the testing section of the University Hospital. This is made on  
781 the basis of individual counseling and taking into account exposure, symptoms, and  
782 symptoms in contact persons.

783 The performance of all sample collections, the read result of the antigen rapid test, the  
784 presence/absence in the daycare centers, the time estimated by the parents for the sample  
785 collection and, if applicable, 'workdays lost' due to a positive antigen rapid test are queried  
786 online 1x/week from the parents/child care staff.

787 The examinations take place for a 12-week period.

788 4.3.1.4 Offer of additional examinations for symptomatic participants

789 Symptomatic participants (daycare center children and child care staff of the facilities), who  
790 are excluded from daycare center attendance according to the regulations of the Bavarian  
791 Hygiene Framework for Daycare Centers, are not allowed to visit the daycare center in the  
792 case of *potential symptoms* for COVID-19 as defined in the Hygiene Framework. In addition,  
793 all parents and child care staff will have the symptoms of COVID-19 explained to them by  
794 means of appropriate informational materials on the study website and via posting at the  
795 daycare center.

796 Symptomatic participants are offered an appointment for a timely throat swab for SARS-CoV-  
797 2 at the COVID-19 examination center at the University Hospital of Wuerzburg, House D20.  
798 In the COVID-19 examination center, the onset of disease and symptoms are additionally  
799 queried in a standardized questionnaire and transmitted to the study center.

800 If this is not accepted by the study participants, they are requested to inform the study  
801 secretariat of the result of any SARS-CoV-2 test performed by a third party (e.g., general  
802 practitioner).

803 Case module 4.3.1.7 will be followed if SARS-CoV-2 is detected in symptomatic study  
804 participants (daycare center children and child care staff).

805 Supplemental screening services are only valid as part of the study for the period during  
806 which respiratory screening is performed in asymptomatic participants (approximately 12  
807 weeks). Medical care of symptomatic individuals will not take place as part of the study. It will

808 rather be the responsibility of the appropriate resident physicians/pediatricians of the affected  
809 individuals.

#### 810 4.3.1.5 Sampling and processing

##### 811 *Samplings*

812 As part of the study, parents or child care staff will collect respiratory samples from  
813 asymptomatic daycare center children or themselves (asymptomatic child care staff) at home  
814 on the scheduled day of testing according to the informational materials, online training, and  
815 videos provided by the study site or, in the case of antigen rapid testing, additionally  
816 according to the manufacturer's instructions.

817 The mouthwash sample collection are usually submitted to the daycare center (except for  
818 Group 1 in case of a positive rapid test, in which case they are submitted together with a  
819 throat swab at the examination center at the University Hospital). CE-marked antigen rapid  
820 tests are provided for self-testing by means of nasal swab, according to special approval for  
821 non-professional use (see BfArM - Antigen-Tests for SARS-CoV-2).

822 Since respiratory sampling is done at home, droplet and aerosol formation such when  
823 collecting samples at the daycare center is avoided. Screening by mouthwash sampling can  
824 only be used in children  $\geq 2$  years of age who are able to actively provide saliva. If possible,  
825 sampling should be done before taking breakfast/brushing teeth.

826 Throat swabs are taken at the COVID-19 examination center (University Hospital Wuerzburg,  
827 D20).

##### 828 *Pooling of mouthwash samples with retests*

829 The processing, examination and reporting of the mouthwash sample is carried out at the  
830 Institute for Hygiene and Microbiology and/or the Institute for Virology at the University of  
831 Wuerzburg. This ensures that the result is received and reporting of findings and notification  
832 of results for SARS-CoV-2 is all done within 24 h the of mouthwash collection. In the case of  
833 a positive result, the respective participant will be contacted directly by phone and the  
834 Department of Public Health will be informed in accordance with Section 7  
835 Infektionsschutzgesetz [Infection Protection Act] (4.3.1.6). Also the daycare center will be  
836 informed without a name being given that a case has occurred in the daycare center.

837 The pooling of PCR samples is carried out with the aim of increasing test capacities and  
838 saving costs. In accordance with the position paper of the working group for laboratory  
839 capacity at the RKI, pooling is used in the context of Wue-KiT-Ta-CoV 2.0 "in the context of  
840 screening and surveillance investigations (e.g., testing of asymptomatic employees in  
841 medical facilities or for occupational health examinations) and/or surveillance examinations  
842 (e.g., indicator populations) with an expected very low prevalence or regionally  
843 correspondingly low 7-day incidence."  
844 ([https://www.rki.de/DE/Content/InfAZ/N/Neuartiges\\_Coronavirus/Laborkapazitaeten.pdf?\\_\\_blob=publicationFile](https://www.rki.de/DE/Content/InfAZ/N/Neuartiges_Coronavirus/Laborkapazitaeten.pdf?__blob=publicationFile)).

846 The pooling strategy will be reviewed during the duration of the study depending on the local  
847 incidence and local age group-specific incidence of SARS-CoV-2. It will be adapted as  
848 necessary. The laboratory capacity working group considers a pooling of 5 individual  
849 samples possible. Much larger pools (up to 64) are described in the corresponding specialist

850 literature. From a pool size of about 15, relevant limitations of the sensitivity are to be  
851 expected (see [https://ladr.de/sites/all/themes/cont/files/\\_01\\_bilder/01\\_medizin/02\\_beratung/infektiologie/200515\\_ALM-POSITIONSPAPIER\\_SARS-CoV-2-POOLING.pdf](https://ladr.de/sites/all/themes/cont/files/_01_bilder/01_medizin/02_beratung/infektiologie/200515_ALM-POSITIONSPAPIER_SARS-CoV-2-POOLING.pdf)).

852  
853 Within the framework of Wue-KiT-Ta-CoV 2.0, pools of size 4-16 are to be used.

854 The respective pool size is documented.

855 Samples from daycare center children as well as samples from daycare center child care  
856 staff are first analyzed by pooling. It is NOT mandatory that the samples in the pool belong to  
857 the same daycare center or daycare center group. This is because the pool is dissolved in  
858 the event of a positive result and all participants in the positive pool are retested individually  
859 using the reserve samples.

860 The reserve samples are prepared in the laboratory. A minimum of 100 µl is needed to set up  
861 the pool, and 100-200 µl is needed for the reserve sample (based on previous experience  
862 from the previous study, mouthwash containers are reliably filled with 4-8 ml of mouthwash).

863 See Section 6.3.1 on the laboratory details.

864

865 *Sample storage, additional tests*

866 Random samples of the reserve samples from 3 specified time points will be stored until the  
867 end of the study. Otherwise the samples will be stored for approximately 1 week and then  
868 disposed of as directed.

869 In the declaration of consent form, it is pointed out that respiratory residual material can be  
870 stored and, if necessary, retested for scientific purposes at a later time by means of multiplex  
871 PCR for the presence of other common viral pathogens of respiratory infections (e.g.  
872 influenza virus, RSV, rhinovirus, other coronaviruses, adenovirus). Since these follow-up  
873 tests will not take place until several months after completion of the tests in the daycare  
874 centers, no further feedback of the results to the test persons or their parents/custodians is  
875 planned.

#### 876 4.3.1.6 Communication of the proof of SARS-COV-2

877 If SARS-CoV-2 is detected by the laboratory (Virology/Microbiology) in symptomatic and  
878 asymptomatic participating children or child care staff, the laboratory will submit its findings to  
879 the Department of Public Health in accordance with Section 7 of the Infection Protection Act.

880 In addition, in the case of SARS-CoV-2 positive findings, the directly affected study  
881 participants will be informed by a physician from the study center and will receive a  
882 standardized information letter.

883 There is no information of the name by the laboratory/study center to the daycare centers.  
884 The daycare center is informed though that a positive result has been obtained from the  
885 daycare center, which has been forwarded to the Department of Public Health, and that - if  
886 this has not yet been done by the Department of Public Health- the daycare center should  
887 actively contact the Department of Public Health in order to prevent delays in outbreak  
888 management. Further informing of the daycare centers is effected place via the Department  
889 of Public Health.

#### 890 4.3.1.7 Case module

891 In case of detection of SARS-CoV-2 in children or child care staff participating in the study in  
892 individual tests or in individual retesting of reserve samples, the laboratory will report to the

893 Wuerzburg Department of Public Health in accordance with Section 7 of the Infection  
894 Protection Act. Individuals who test positive are subject to the instructions of the Department  
895 of Public Health.

896 The decision as to whether the care facility of the child/child care staff who tested positive will  
897 remain open is the responsibility of the Wuerzburg Department of Public Health.

898 If the daycare center group should remain open for the time being in special agreement with  
899 the Wuerzburg Department of Public Health, there is the option of increasing the testing  
900 frequency of the study participants in the affected daycare center group and offering  
901 additional testing to non-study participants in the daycare center group as part of the study  
902 (see: Page 25/26).

903 Re-admission to the childcare facility is regulated in the Bavarian Hygiene Framework for  
904 Daycare Centers and is subject to the instructions of the Department of Public Health.

905 For control purposes, the Department of Public Health informs the study center about the  
906 total number of positively tested daycare center children/child care staff per daycare center  
907 and week (aggregated data only, no individual data). In addition, the Department of Public  
908 Health also provides the study center with the corresponding data from those daycare  
909 centers in Wuerzburg not participating to enable a descriptive comparison with the  
910 participating daycare centers.

#### 911 **4.3.2 Psychosocial dimension (questionnaire)**

912 The successful implementation of the planned screening measures largely depends on  
913 acceptance by the parents, children, and institutions. So far there is little systematic data on  
914 the extent of willingness to participate as well as the acceptance of such a preventive  
915 measure related to the SARS-CoV-2 pandemic. Testing the feasibility of different screening  
916 records must therefore be accompanied by quantitative research and qualitative surveys of  
917 all participants. In addition, the pilot study offers the opportunity to assess factors influencing  
918 the acceptance of longer-term monitoring. This is in order to identify potential targets for  
919 accompanying interventions to increase acceptance.

920 Wue-KiT-Ta-CoV 2.0 will collect questionnaire-based data at two points in time (at the  
921 beginning and after implementation of the measures) on the acceptance of the respective  
922 surveillance protocol from parents/custodians, children in daycare centers, and daycare  
923 center child care staff. Potential predictors of longer-term acceptance among participants will  
924 be examined:

925 a) Sociodemographic factors (such as education status, household size)

926 b) Expectations/attitudes of parents/custodians and child care staff regarding the pandemic

927 c) Expression of psychological symptoms (especially anxiety and depression).  
928 Questionnaires with validated psychometric instruments/scores (such as PHQ4, EQ-5D, and  
929 the anxiety/depression subscale of the CBCL 1½ -5<sup>23-25</sup>) will be used, as well as a  
930 sociodemographic battery already in use in cooperation with the Robert Koch Institute as part  
931 of the CORONA HEALTH APP study (PI: Rüdiger Pryss, Co-PI: M Romanos).

932 Furthermore, qualitative interviews will be conducted with a subsample of parents/custodians  
933 as well as with child care staff from all facilities. This is to explore in greater depth the  
934 findings about expectations, desires, and reservations of the study participants regarding the

935 measures to be introduced. At the end of the intervention, follow-up interviews will explore  
936 reasons for acceptance or lack of acceptance in order to identify and, if possible, minimize  
937 potential barriers and obstacles of an implementation. The same interview partners will also  
938 be invited to the second interviews. Only in case of their non-participation are new  
939 participants recruited. The invitation to qualitative interviews takes into account as many  
940 different socio-demographic characteristics as possible when selecting interview partners.  
941 This is in order to achieve maximum contrast in terms of age, gender, education, marital  
942 status and place of residence (purposive sampling). This procedure is based on the  
943 assumption that the sociodemographic characteristics described above will have an influence  
944 on the aspects/topics to be identified in the interview material.

945 A semi-structured interview guideline is used for the interviews. The interviews are  
946 conducted by phone. The duration is estimated at approximately 30 minutes. The  
947 conversations are tape-recorded and then pseudonymized and transcribed. The evaluation is  
948 carried out content-analytically in a mixed deductive-inductive approach according to  
949 Kuckartz<sup>26</sup> using the MAXQDA software. The data collected during the interviews will be  
950 analyzed in parallel with the interviews. Additional study participants will be included until no  
951 new aspects/topics are to be expected anymore (data saturation)<sup>27,28</sup>.

952 Children 3 years of age and older will be asked a question about the experience of  
953 respiratory sampling(s) by parents at two time points. Additionally parents are asked for their  
954 assessment of the child's readiness to participate.

### 955 **4.3.3 Serology**

956 For serological testing for the presence of antibodies against SARS-CoV-2, a few drops of  
957 blood will be taken from a prick of the fingertip of the subjects (children in care, as well as  
958 child care staff) at the beginning and at the end of the study. Blood collection is performed by  
959 trained personnel and under medical supervision.

960 Only in the case of positive or borderline findings, may a venous blood sample be taken for  
961 confirmation if consent is given (see 4.2).

962 Serological testing is performed by point-of-care testing on site and at the Institute of  
963 Hygiene and Microbiology and/or the Institute of Virology at the University of Wuerzburg.

964 If sample material is still available after testing, it is preserved for 10 years. Antibody tests for  
965 the detection of antibodies against SARS-CoV-2 are currently being further developed under  
966 high innovation pressure. The samples can thus be re-examined using future, improved  
967 procedures.

968 All study participants (or parents/custodians in the case of children) will be notified of the  
969 results of the serological testing.

970 For details on the test system: see Sections 6.3 and 6.4.

---

## 5 TEST PERSONS SAFETY, WORK SAFETY

971

972

973 Additional (optional) throat swabs for symptomatic daycare center children and daycare  
974 center child care staff, as well as blood sample collections, are always performed by  
975 medically trained personnel who can initiate appropriate emergency measures in the very  
976 rare event of complications.

977 The mouthwash collection and nasal swabs for the antigen rapid test, which can be  
978 performed by the parents after having received information by the study staff, should  
979 generally be performed on the collection days specified for each daycare center before the  
980 daycare visit (mouthwash collection before breakfast/before brushing teeth; in Group 1,  
981 parallel antigen rapid testing). Parents will have the testing explained to them prior to the first  
982 use in online information sessions using training videos that will also be made available for  
983 retrieval from the study website. A study hotline will be available for questions about  
984 sampling. A written instruction for sample collection including emergency number is handed  
985 out to the parents.

986

987 *Transport of respiratory sample material*

988 Antigen rapid tests:

989 Only approved antigen rapid tests for nasal swabs are used, in accordance with Special  
990 approval for non-professional use (see [BfArM - Antigen tests for SARS-CoV-2](#)). The  
991 performance and documentation of the results takes place at home, there is no transport of  
992 the used antigen rapid test. Parents dispose of the used antigen rapid tests according to the  
993 manufacturer's instructions.

994 Mouthwash tubes:

995 Information material and instructions on the correct collection and packaging are provided for  
996 parents on the website and in printed form. There is also an explicit reference made to the  
997 fact that tubes that may be wet on the outside should be dried before being placed in the  
998 prepared outer packaging. If applicable, mouthwash samples that have not been closed  
999 correctly are already secured against leakage by the outer packaging at home.

1000 The sample tubes placed in the outer packaging are submitted by the parents together with  
1001 the outer packaging at the daycare center in a suitable collection container. Hand disinfection  
1002 materials are routinely available in the daycare center.

1003 Collection of the collection container at the end of the daycare center admission time is  
1004 arranged by the study center. The transport of the sample tubes takes place in the closed  
1005 transport boxes with secondary packaging inside (transport regulation UN3373). Unpacking  
1006 only takes place in the laboratory under safety precautions.

1007 The German regulations and directives BioStoffV and TRBA also apply for transport and  
1008 analytics.



---

## 1009 6 DATA PROCESSING

### 1010 6.1 Source data and material

1011 Study data are obtained from participant lists, paper-based and electronic questionnaires,  
1012 and from sample material.

1013

#### 1014 *Recruitment, registration*

1015 The study center will provide participating facilities with the study information material, test  
1016 subject information and consent forms. The facilities will also receive pre-addressed sealable  
1017 envelopes to the study center for parents/custodians or daycare center child care staff so  
1018 they can submit the documents.

1019 The participating facilities collect the envelopes with the declarations of consent from the  
1020 parents and pass the collected documents on to the study staff. These documents are  
1021 reviewed and archived at the study center, and daycare center-specific participant lists are  
1022 created. Each participant is assigned a study number with the consent form  
1023 (pseudonymization).

1024 The study-specific online survey is stored pseudonymously via the EDC (Electronic Data  
1025 Capture) system REDCap®.

1026 The EDC system is hosted on servers at the University of Wuerzburg under the responsibility  
1027 of the University of Wuerzburg Computer Center. The 'Security Policy' conforms to the  
1028 standard of the University of Wuerzburg Access to the stored data is guaranteed via role and  
1029 rights management of the EDC system.

1030

#### 1031 *Interview at the start of the study (Week 1) and end of the study (Week 12)*

1032 Participants provide their email address when consenting to the study. At two pre-defined  
1033 time points (Week 1 and Week 12), they are interviewed using the REDCap® EDC system.  
1034 To this purpose, the participants are sent access data (pseudonym and password) by e-mail.  
1035 These can be used to verify themselves in the EDC system and then complete the surveys  
1036 using eCRF.

1037

#### 1038 *Sample collection / tests*

1039 Pre-labeled materials will be provided to the parents in the case of mouthwash samples and  
1040 antigen rapid tests taken out by the parents. The sample tubes with the mouthwash samples  
1041 are submitted by the parents to the daycare center in transport materials which were  
1042 provided to them. From there, collection and transport to the laboratory is carried out by the  
1043 study center.

1044 The time of sample collection and the results of the antigen rapid tests are queried online  
1045 1x/week via REDCap® for each participant and registered in the study database and are  
1046 used for the documentation of the tests performed.

1047 Blood samples for seroprevalence testing are collected, labeled, and documented by  
1048 medically trained personnel. The samples are forwarded to the appropriate analysis sites at  
1049 the Institutes of Microbiology or Virology at the University of Wuerzburg.

1050 Laboratory samples are identified by name because feedback on conspicuous results should  
1051 be provided to parents/daycare center child care staff and must be provided to the  
1052 Department of Public Health if SARS-CoV-2 is detected.

1053 In addition, in the case of missing mouthwash samples or missing information on the antigen  
1054 rapid test, the presence of the participating children in the daycare centers (present / planned  
1055 absent (e.g. vacation) / unexpected absent (e.g. due to illness) and the successful collection  
1056 of the sample (nasal swab or mouthwash sample) are queried.

1057 Children aged 3 years and older will be interviewed by parents at the Week 1 and Week 12  
1058 time points. This will be done using a simple online questionnaire ('smileys') about sampling.  
1059 Parents will also be asked for their assessment of children's acceptance of the measures.  
1060 The data are recorded in REDCap®.

1061 Data on the acceptance of the measures by child care staff and parents will be collected  
1062 quantitatively in questionnaires on all participants and qualitatively in semi-structured guided  
1063 interviews in all groups of participants (after separate consent). These interviews are  
1064 conducted by the staff of the Institute of General Medicine in collaboration with the  
1065 Department of Child and Adolescent Psychiatry.

#### 1066 *Basic data daycare centers*

1067 In addition, basic data on the daycare centers already available from Wue-KiT-Ta-CoV will be  
1068 updated by means of a daycare center questionnaire (including the total number of cases per  
1069 daycare center children + child care staff, group sizes, number of child care staff/group) and  
1070 sent to the study center and forwarded to the Institute for Clinical Epidemiology and Biometry  
1071 for evaluation.

1072 Information on days absent per daycare center and week is anonymously documented by the  
1073 daycare center staff for the individual care units. The figures are sent to the study center and  
1074 forwarded to the Institute for Clinical Epidemiology and Biometry for evaluation.

1075 The number of mouthwash samples collected and antigen tests performed will be recorded  
1076 at the study center based on the mouthwash samples provided and the rapid tests  
1077 documented by parents/child care staff (to determine material costs, testing costs). Parents  
1078 of participating daycare center children are asked to estimate their additional time required  
1079 for sample collection/labeling/packaging.

## 1080 **6.2 Study database**

1081 The records on the subjects are managed centrally in the study secretariat. Only  
1082 pseudonymized data will be collected (study center at the Institute of Hygiene and  
1083 Microbiology, electronic questionnaires at the Institute of Epidemiology and Biometry).

1084 The analyses of the sample material are performed at the University of Wuerzburg in the  
1085 Institutes of Microbiology and Virology, respectively, and the results are recorded in Excel  
1086 databases. The laboratory results are transmitted to the study center via a specially set up,  
1087 protected exchange drive and forwarded in pseudonymized form to the Institute for Clinical  
1088 Epidemiology and Biometry for evaluation.

1089 The data from the questionnaires and the laboratory results will be merged pseudonymously  
1090 for evaluation using the study number by the Institute of Clinical Epidemiology and Biometry.

1091 The data required for the collection and evaluation are saved in two separate systems. Each  
1092 participant is assigned a pseudonym so that on the surveys only the pseudonym and no  
1093 personally identifying data is used. Through an assignment list and using a pseudonym the  
1094 personally identifying data can be assigned to the research data. During the period of this  
1095 assignment, the research data are considered "personal data" and data protection laws must  
1096 be observed accordingly. To this purpose, a database is specially programmed by the central  
1097 data processing unit (IKE-B). It will store the contact data and e-mail addresses and the  
1098 associated pseudonym.

1099

## 1100 **6.3 Laboratory methods**

### 1101 **6.3.1 Virus identification**

#### 1102 **a) Polymerase chain reaction (PCR)**

1103 Pools with equal volumes per sample (approx. 100 µl), homogenized, RNA extraction (most  
1104 likely Microgen RNA kit), PCR.

1105 Pools are tested by RT-qPCR capacity-dependent among others with the following devices  
1106 with CE marking: RotorGene (Qiagen), BDmax (BectonDickinson), NeuMoDX (Qiagen)

1107 Single samples in the case of pool splitting are split by GenomEra CDX PCR ("rapid PCR").

1108 The results of the PCR of the pools - after sample transport, pooling and PCR - will not be  
1109 available until the afternoon. A technique with a very short time-to-result is therefore needed  
1110 to split the pool as well as to communicate the positive finding to the test subject and the  
1111 Department of Public Health. Using GenomEra this is very short at 45 minutes (up to 8  
1112 samples). This means that using this equipment to split the pools allows the finding to be  
1113 established and communicated while doing justice to the time requirements.

1114 Pooling results including retesting from reserve samples are available within 24 hours.

1115 An internal validation of the system will be performed prior to study initiation using 'spiked'  
1116 samples of mouthwash water. If necessary, the sample quality is checked at two time points.  
1117 This is done by detecting the number of copies of the albumin gene.

1118

1119 *VOC testing:*

1120 All positive samples (mouthwash and throat swabs) will be analyzed for an N501Y mutation  
1121 by melting curve analysis. Subsequently, PCR examines the sample for the Δ69-70 deletion  
1122 (variant B.1.1.7). For N501Y mutations without Δ69-70 deletion, whole genome sequencing  
1123 is performed to detect other variants.

1124

---

1125 **b) CE-marked antigen rapid tests for self-testing (“for non-professionals”)**

1126 Antigen testing is performed by a yet to be determined test that is approved for non-  
1127 professional testing i) according to BfArM and ii) approved for testing from a swab of the  
1128 anterior nasal wall.

1129

1130 **6.3.2 Antibody detection**

1131 Enzyme-linked immunosorbent Assay (ELISA), Point-of-Care –Test (lateral-flow ELISA)

1132 Screening in daycare center with rapid test after finger tip punctation: Abbott Panbio  
1133 COVID-19 IgG/IgM (Target: Nucleocapsid, for test selection we refer to our own preliminary  
1134 work: <https://www.medrxiv.org/content/10.1101/2021.02.07.21251062v1>), verification: ELISA  
1135 Virion/Serion agil IgG (target spike protein) und Roche Elecsys Anti-SARS-CoV-2 IgG (target  
1136 nucleocapsid). Through the screening vaccination responses should not be detected. All  
1137 daycare center child care staff who are positive during screening will be asked their  
1138 vaccination status to interpret the result. Thanks to the used serological tests with different  
1139 targets, discrimination between an infection and a vaccination response is possible. All  
1140 participants who screen positive will be asked about any previous PCR-confirmed Covid  
1141 infections.

1142

1143 **6.4 Samples**

1144 **6.4.1 Nasal swabs for antigen rapid tests**

1145 Details on the implementation of sample collection:

1146 Nasal swabs are taken as nasal concha swabs according to the manufacturer's instructions  
1147 for each test. As a rule, the child's head is tilted back slightly, the swab is inserted into one  
1148 nostril from the front and rotated 3 times. This sampling will be done by parents at home  
1149 according to the manufacturer's instructions and standardized to the extent possible (via  
1150 training of parents through printed informational materials, online training, and retrievable  
1151 videos on the study website). There will also be specific instructions in addition to the  
1152 manufacturer's instructions for sampling in children

1153 There is no reuse of used materials.

1154

1155 **6.4.2 Mouthwash samples**

1156 Details on the implementation of sample collection:

1157 This sampling is done by parents at home and is standardized as much as possible (via  
1158 training of parents through printed informational materials, online training, and retrievable  
1159 videos on the study website).

---

1160 Parents are given prepared labels and sample tubes (50 ml) for saliva samples. To collect  
1161 the sample, a tablespoon of tap water or still water is taken into the mouth, rinsed, and the  
1162 mouthwash is returned to the sample tube. The sample tube is labeled and packed in a  
1163 sample bag and placed in a suitable collection container in the daycare center until the end  
1164 of the daycare center admission time.

1165 There is no reuse of used materials.

1166

### 1167 **6.4.3 Blood samples**

1168 Details on the implementation of sample collection:

1169 Blood samples are taken as fingertip pricks by using a safety lancet (disposable material).  
1170 After disinfection and prick, the blood is taken up into a capillary from which it is applied to  
1171 the point-of-care test.

1172 In the case of abnormal or borderline findings (approximately 1 % of findings), a venous  
1173 blood sample (1 ml, according to WHO- guideline <sup>29</sup>) is additionally offered. It is taken by a  
1174 physician under specialist supervision after written consent.

1175

---

## 1176 7 BIOMETRIC ASPECTS

### 1177 7.1 Endpoints

1178

#### 1179 Primary endpoint:

##### 1180 Usability:

- 1181 • Initial acceptance rate of the respiratory sampling (Group 1, 2, 3 combined) on the  
1182 basis of the specifications on the declaration of consent (participant rate of all suitable  
1183 participants)

1184

#### 1185 Secondary endpoints:

##### 1186 Usability:

- 1187 • Participation rate stratified by participant group (Group 1, 2, 3)
- 1188 • Acceptance rate of the respective participant records defined as the share of  
1189 'successful' participations in all 'planned' specimen collections (mouthwash and/or  
1190 nasal swab for non-professionals) among participating asymptomatic children and  
1191 child care staff of the facility. For an individual participant, participation in specimen  
1192 collection is considered successful when 60 % of the planned (asymptomatic)  
1193 specimen collections have been successfully completed.

##### 1194 Effectivity (as a screening instrument):

- 1195 • Detection rate of SARS-CoV-2 infections in the daycare centers in total per  
1196 participant/per testing (daycare center children plus daycare center child care staff)  
1197 and in relation to the 7-day incidence in the total population of children in the  
1198 corresponding age group.

1199

#### 1200 Further endpoints:

##### 1201 Usability:

- 1202 • Acceptance of mouthwash submission (proportion of successful tests in Group 1 plus  
1203 Group 2)
- 1204 • Acceptance of the non-professional antigen rapid tests (nasal swab) (share of the  
1205 tests carried out successfully in Group 1 plus Group 3)
- 1206 • Predicators of the acceptance for longer-term usage
- 1207 • Psychosocial effects, including satisfaction and fulfillment of parents' need for safety  
1208 (using questionnaires and validated scores) at the beginning and end of the study
- 1209 • In subgroups: Long-term psychosocial effects, including satisfaction and fulfillment of  
1210 parents' need for safety (using questionnaires and validated scores) including  
1211 participants of both Wue-KiTā-CoV and Wue-KiTā-CoV 2.0 (6-month evaluation)
- 1212 • Satisfaction of the children (assessment by the parents and child questionnaire in  
1213 Week 1 and Week 12).
- 1214 • Frequency of consequences in the case of positive tests (daycare center group  
1215 closures / daycare center closures, total 'workdays lost' due to PCR-confirmed  
1216 detections, and additional 'workdays lost' due to false-positive antigen rapid tests)

1217

1218 Effectivity (as a screening instrument):

- 1219 • Detection rate of SARS-CoV-2 infections in daycare centers per participant group
- 1220 (Group 1, 2, 3), separately for children and child care staff
- 1221 • Proportion of all positive PCR tests in total (mouthwash) (Group 1 + Group 2)
- 1222 • Proportion of all positive antigen rapid tests in total (nasal swab) (Group 1 + Group 3)
- 1223 • Comparison of detection rates of SARS-CoV-2 infections by means of non-
- 1224 professional antigen rapid testing (nasal swab) versus PCR (from mouthwash) in
- 1225 parallel testing of asymptomatic participants (Group 1) for identification of false-
- 1226 negative detections in the antigen rapid test.
- 1227 • Identification of false-positive antigen rapid testing through retesting by means of
- 1228 PCR
- 1229 • Length of time between sample collection and notification of a positive test result for
- 1230 PCR testing.
- 1231 • Detection rates of SARS-CoV-2 Variants of Concern (VOCs), in total and over time
- 1232 • Detection rates as a function of the 'daycare center' group composition (proportion of
- 1233 study participants, proportion of Group 1 participants)
- 1234 • Proportion of positive serologic tests overall (children/child care staff), correlation of
- 1235 positive PCR and seroconversion between first and second serologic testing. This is
- 1236 a control for effectivity of surveillance approaches.

1237

1238 Efficiency (evaluation of economic efficiency):

- 1239 • Costs for material and tests of asymptomatic participants (direct costs)
- 1240 • Quantification of the influence of pooling on the test costs
- 1241 • Costs of retesting positive antigen rapid tests of asymptomatic participants with PCR
- 1242 • Transport costs (sample collection for laboratory)
- 1243 • Parents' estimate of the average time spent sampling

1244

1245 Scalability (evaluation of further usability):

- 1246 • Extrapolation of the number of participants, test consequences, and costs for all
- 1247 daycare centers in Wuerzburg
- 1248 • Cost-benefit assessment
- 1249 Modeling of scalability as a function of participant rate, background incidence, test
- 1250 frequency, detection rate detection method, etc., using state-based modeling
- 1251 techniques.

1252

1253 **Exploratory analyses regarding potential predictors of longer-term acceptance**

- 1254 • Longer-term acceptance with respect to respiratory sampling as a function of
  - 1255 ○ Child's age and sex
  - 1256 ○ Family size
  - 1257 ○ Education status

- 1258 ○ Screening concept
- 1259 ○ Personal assessment of the danger of SARS-CoV-2 infections
- 1260 ○ Personal attitude towards SARS-CoV-2 vaccination

1261 **Exploratory analyses regarding psychosocial effects: Data collection with survey,**  
 1262 **based on the content of the Corona app of the RKI and qualitative interviews at the**  
 1263 **beginning and at the end of the intervention**

- 1264 • Parents' satisfaction with screening measure (Week 1, 12)
- 1265 • Parents' sense of safety with screening measure (Week 1, 12)
- 1266 • Subjective stress level through screening measure (Week 1, 12)
- 1267 • Family climate worsened through screening measure (Week 1, 12)
- 1268 • Everyday organization impaired through screening measure (Week 1, 12)
- 1269 • Personal consequences assessed as negative occurred due to screening measure  
 1270 results (e.g., quarantine due to SARS-CoV-2 positive test) (Weeks 1, 12)
- 1271 • Psychological symptoms using validated questionnaires (Week 1, 12)

1272 **Qualitative interviews: in-depth recording of expectations and attitudes of study**  
 1273 **participants before and after implementation of the screening measures.**

- 1274 • Before the intervention: Expectations, wishes, and reservations of study participants  
 1275 regarding screening measures
- 1276 • After the intervention: Experiences with screening measures, reasons for acceptance  
 1277 or lack of acceptance, potential barriers and obstacles to implementation.

1278 **Child surveys on the acceptance of the measure (child questionnaire)**

- 1279 • Acceptance of the children (based on a question asked by parents - answer by  
 1280 means of 'smiley' questionnaire; and according to parent assessment (Week 1, 12).

1281 **Exploratory analyses regarding costs of the measure**

- 1282 • Average cost per sampling and index child, per week
- 1283 • Average estimated parent/child care staff time per week for  
 1284 sampling/labeling/packaging (Week 1, 12).
- 1285 • Average cost per detection of SARS-CoV-2 infection (number and cost of tests  
 1286 performed to detect SARS-CoV-2 infection).

1287 **Supplemental analyses of child care staff immunization status**

1288 SARS-CoV-2 vaccination status among daycare center child care staff (Week 1, 12).

1289

## 1290 **7.2 Procedure for data analysis**

1291

1292 To estimate the primary endpoints, the 95 % confidence interval is estimated using the  
 1293 Wilson score method. The significance level for all analyses is set to 5 %. Since these are  
 1294 purely exploratory analyses, the significance level is not adjusted for multiple testing. The  
 1295 data are analyzed stratified by daycare center children/parents and child care staff. Initially all



1296 end points are described descriptively (frequency (percentage), mean value (SD) or median  
1297 (IQR)). The development of psychosocial factors is evaluated overall and, if the number of  
1298 cases is large enough, stratified by the participant group. This is done using tests for  
1299 connected samples such as McNemar, ANOVA, and Friedmann. Potential predictors on the  
1300 longer-term acceptance rate (drop-out rate) will be examined overall and stratified by the  
1301 participant group. First in a descriptive manner using suitable tests such as Chi<sup>2</sup> test and  
1302 later, if the number of cases is large enough, using logistic regression (adjusted for the  
1303 participant groups). The analyses are effected by means of SAS, R or SPSS.

1304

### 1305 **7.3 Analysis populations**

1306 For the main analysis, the data of all subjects are included in the analysis.

1307

### 1308 **7.4 Evaluation points**

1309 Overview data on the study status and the tests performed for status reports are extracted  
1310 from the study database on a weekly (short reports) or monthly basis. The main analysis of  
1311 the study data will not begin until respiratory sampling is completed for all study sites  
1312 (expected in mid/late July). An interim evaluation is scheduled for a project report in July  
1313 (July/August). Full evaluation/final report will be completed by the end of 2021.

1314

### 1315 **7.5 Case number discussion and power analysis**

1316 The primary endpoint is the initial acceptance rate (overall for Group 1, 2 and 3).

1317 Eligible': 9 daycare centers in Wuerzburg, with approx. 650 potentially suitable children from  
1318 2 years of age and approx. 180 child care staff, organized in approx. 50 daycare center  
1319 groups

1320 Estimation of the initial number of participants based on the surveillance participation rate for  
1321 mouthwash sampling (2x/week) determined in Wue-KiT-Ta-CoV:

1322 Children: 67 % of approx. 650 'eligible' children = approx. 436 children

1323 A participation rate of 67 % can be estimated from 650 children with a precision of 3.7 %  
1324 (half-width of the Wilson-score 95 % CI).

1325 Child care staff: 86 % of approx. 180 'eligible' child care staff = approx. 155 child care staff

1326 A participation rate of 86 % can be estimated from 180 child care staff with a precision of  
1327 5.3 % (half-width of the Wilson-score 95 % CI).

1328

1329 The maximum number of samples to be expected for a screening period of 12 weeks  
1330 (participation of all potentially eligible 830 individuals in Participant group 1):

1331 Approx. 20,000 mouthwash samples and approx. 20,000 documented antigen rapid tests.

1332

1333 **Case number estimation for the qualitative interviews**

1334 For the interviews, we expect approximately 5 parent/child care staff participants per study  
1335 group (Group 1, 2, or 3) to be recruited from all participating childcare centers. Overall we  
1336 expect to conduct 30 interviews with parents/guardians (interviews at the beginning and end  
1337 of the measures combined). Candidates from all facilities will be recruited for the child care  
1338 staff interviews. Here we expect approximately 5 for the first and 5 for the second final  
1339 interview (overall 10). The overall number of interviews is thus approx. 40.

1340

1341

1342

1343

---

## 1344 8 QUALITY ASSURANCE AND CONTROL

1345

1346 The participant data will be collected in accordance with study-specific 'Standard Operating  
1347 Procedures' in compliance with all legal data protection requirements, and only by authorized  
1348 study personnel specifically trained for the study.

1349

### 1350 **Quality assurance and control**

#### 1351 Data collection and acquisition:

1352 For quality assurance of data collection from questionnaires, paper-based data are either  
1353 acquired twice and compared, or acquired once with post-testing of a sample (10 % of the  
1354 data). This is done according to a pre-determined procedure. Electronic plausibility checks  
1355 are performed on the raw data before electronic processing. Core data of electronically  
1356 recorded questionnaires are already checked for completeness and plausibility during input  
1357 by means of programmed plausibility checks. Electronic reminders are provided if data is not  
1358 received.

#### 1359 **Respiratory samples:**

1360 Parents will receive training material (printed and downloadable from the study website) and  
1361 demonstrations (online training) on how to properly perform and read antigen rapid tests. The  
1362 aim is to reduce or avoid false-positive antigen rapid test reports. An email contact address  
1363 and study hotline will be provided for inquiries.

1364 In the case of missing information on the antigen rapid test, a clarification with the  
1365 parents/child care staff will be made via the study center (planned or unplanned absence  
1366 from the daycare center). In case of a positive antigen rapid test, all participants will be  
1367 offered an additional PCR test (quality assurance to exclude false-positive antigen rapid  
1368 tests).

1369 In case of absence of missing mouthwash samples, a clarification with the parents/child care  
1370 staff will be made via the study center (planned or unplanned absence from the daycare  
1371 center). If the volume of mouthwash samples is repeatedly too high or too low, participants  
1372 will be contacted by telephone to prevent future sampling errors.

1373 The collection, processing and reporting of laboratory samples is subject to the relevant  
1374 regulations of the institutions involved.

#### 1375 Evaluation and publication:

1376 Statistical analysis is performed according to a pre-determined analysis plan by  
1377 university/university hospital staff who are qualified to do so.

1378 Study results will be submitted for publication to a medical journal with external peer review  
1379 procedure.

1380

### 1381 **Data protection**

1382 All study data will be kept strictly confidential and will only be accessible to those directly  
1383 involved in the study at the University or the University Hospital Wuerzburg. Data protection  
1384 also has to be ensured at the participating external facilities through relevant regulations.

1385 For data protection reasons, only pseudonymized data (by assigning a study number to each  
1386 participant) will be electronically recorded and processed (with the exception of laboratory  
1387 samples until the findings have been concluded). No data are collected in questionnaires and  
1388 in the recording of semi-structured interviews that could directly identify a participant (such as  
1389 name, date of birth, address).

1390 For the merging of the laboratory results and the questionnaire data in pseudonymized form,  
1391 a password-protected exchange drive will be set up on the (firewall-protected) server of the  
1392 university/university hospital. Only those persons directly responsible for the study will have  
1393 access to the server.

1394 The data required for the collection and evaluation are saved in two separate systems. Each  
1395 participant is assigned a pseudonym so that on the surveys only the pseudonym and no  
1396 personally identifying data is used. Through an assignment list and using a pseudonym the  
1397 personally identifying data can be assigned to the research data. During the period of this  
1398 assignment, the research data are considered "personal data" and data protection laws must  
1399 be observed accordingly. To this purpose, a database is specially programmed by the central  
1400 data processing unit (IKE-B). It will store the contact data and e-mail addresses and the  
1401 associated pseudonym. This database is stored in an access-restricted folder on a network  
1402 drive of the Medical Informatics Service Center (SMI) of Wuerzburg University Hospital  
1403 (UKW). The data saved here will at no point be merged with the research data. All personal  
1404 data in this database are accessible only to those project staff members responsible for  
1405 sending the e-mails in the project. These staff members are either bound to medical  
1406 confidentiality and/or are obliged to maintain data secrecy in accordance with the EU -GDPR  
1407 as well as regional laws. They will not be passed on to third parties under any circumstances.  
1408 All personal data will be deleted after completion of the study.  
1409

1410 **8.1 Data flow diagram / responsibilities**

1411

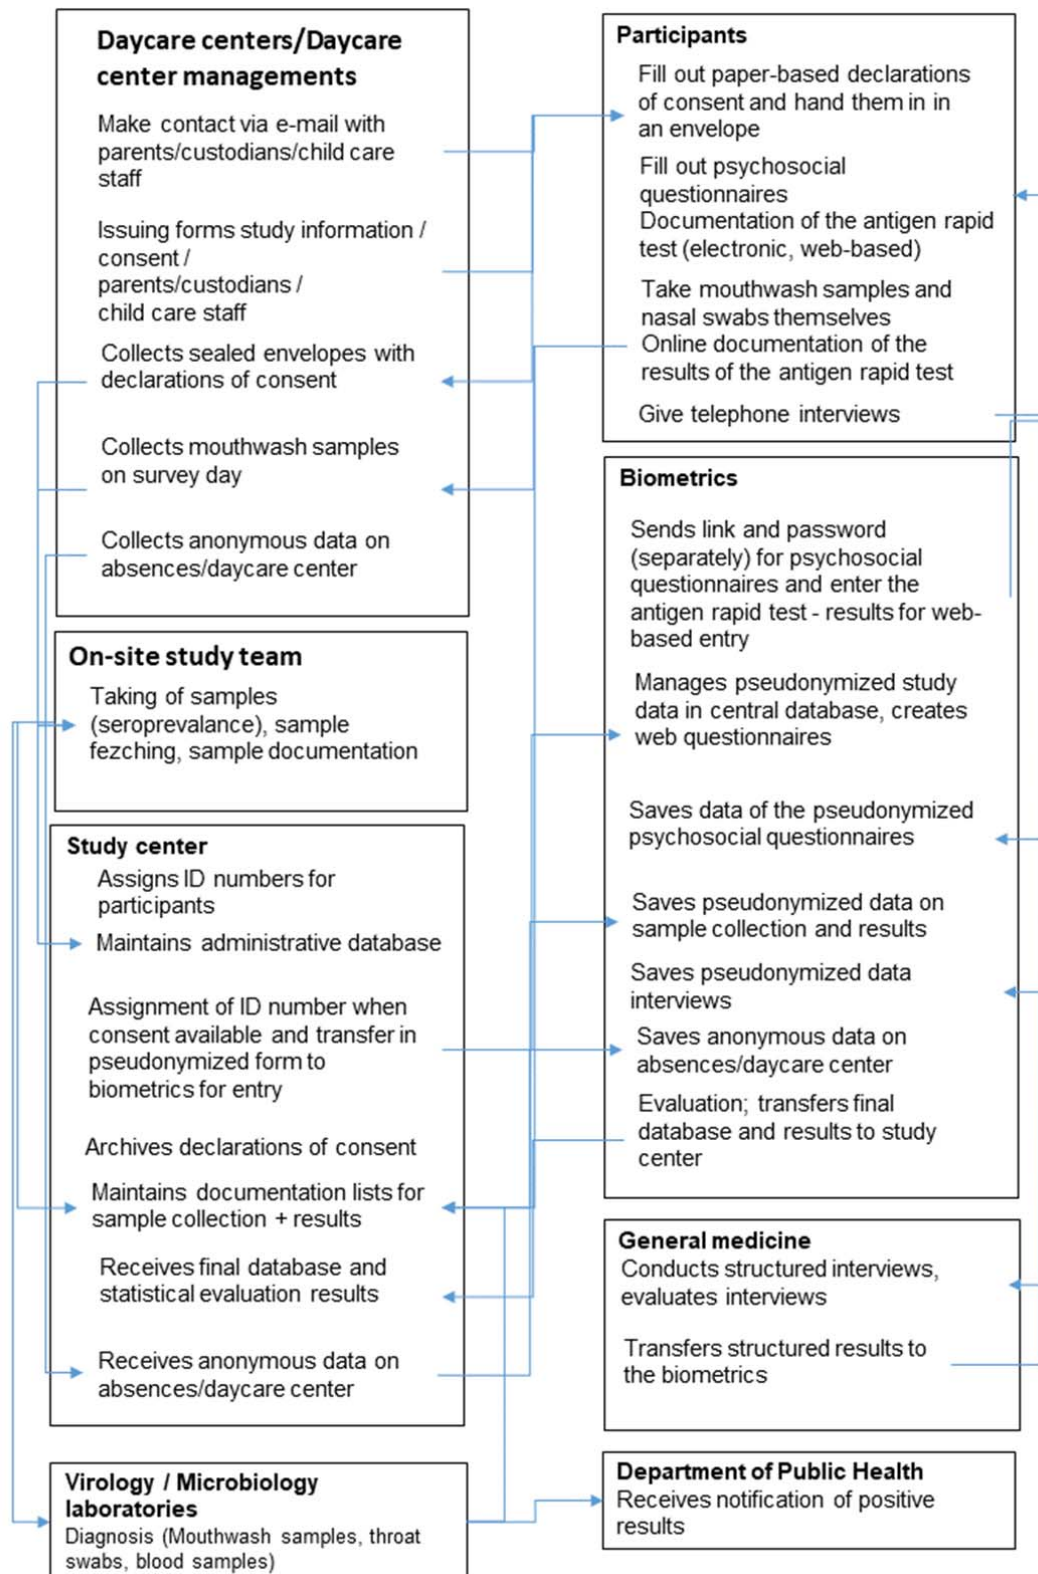

1412

---

1413 **9 PUBLICATION OF THE RESULTS**

1414

1415 Timely publication of the results complete completion of the study in a medical journal is  
1416 aimed for.

1417 The LGL receives status and project reports:

1418

1419 - Status report April 2021 ('Manual')

1420 - Status report May 2021

1421 - Status report June 2021

1422 - Project report July/August 2021 ("meaningful")

1423 - Final report Sep 2021 (provisional; main evaluation)

1424 - Final report Dec 2021 (final evaluation)

1425

1426 Plus there are weekly short reports in regards to:

1427 - N included children (only during recruitment phase)

1428 - N documented tests per week

1429 - Cumulative since project start:

1430 a) Positive tests (pool/individual tests mouthwash, documented antigen rapid tests)

1431 b) If appropriate, correct-positive (after PCR confirmation of antigen rapid tests)

1432 c) if appropriate, wrong-negative tests after PCR confirmation (only possible for participant  
1433 Group 1 tested in parallel)

1434

---

1435 **10 TEST PERSONS INSURANCE**

1436

1437 In terms of sampling, the antigen rapid non-professional tests and mouthwash sampling are  
1438 done by parents. These are samples with very low risk profiles, accordingly there is no test  
1439 subject insurance for these. Sampling by study staff (throat swabs, blood samples) are study-  
1440 related, non-medically justified 'interventions' with a low risk profile. Before the start of  
1441 sampling, a 'test persons insurance for clinical trials not subject to compulsory insurance  
1442 (according to AMG/MPG)' should be concluded for samples taken by study staff. There is no  
1443 framework agreement of the legal department of the UKW with the HDI Gerling insurance  
1444 company For the individual subject, the corresponding sum insured is expected to be a  
1445 maximum of EUR 250,000.00. For all insured events in the study a maximum of EUR  
1446 5,000,000.00 (see General Conditions of Insurance for Clinical Trials Not Subject to  
1447 Compulsory Insurance/Annual Contract, AVB-Prob/NV-JV, Form. 404 U205).

1448

---

## 1449 11 ETHICAL BASIS

### 1450 11.1 Ethics vote

1451 An ethics vote is obtained from the Ethics Committee at the Medical Faculty of the University  
1452 of Wuerzburg. In the predecessor study Wue-KiT-Ta-CoV, the principle procedure of  
1453 mouthwash submission and all accompanying investigations (surveys, seroprevalence  
1454 testing) was already reviewed under ethical aspects and approved.

### 1455 11.2 Test persons information and consent for sample collection

1456 The information on Wue-KiT-Ta-CoV 2.0 will be provided in writing in the form of an information  
1457 sheet on the study. This also covers voluntary participation, the possibility of withdrawing  
1458 consent (at any time), and any risks. In addition, verbal clarification and information will be  
1459 provided prior to sample collection (blood samples for seroprevalence testing only; all other  
1460 sample collection will be done by parents; training for this will be provided through online  
1461 information sessions and videos on the study website). For previous participants of Wue-  
1462 KiT-Ta-CoV, renewed clarification and consent for Wue-KiT-Ta-CoV 2.0 takes place.

1463 The written consent from both parents/custodians of participating daycare center children, or  
1464 from daycare center child care staff on a consent form is required.

1465 If required, additional forms will be provided in English and Arabic.

### 1466 11.3 Consent to take part in the study

1467

1468 Except in the case of sole custody by one parent, the written consent of both  
1469 parents/custodians of participating daycare center children or the written consent of daycare  
1470 center child care staff on a consent form after verbal and written information is required.

1471 The following explicit consents will be obtained in addition to consent for study participation  
1472 including online surveys:

- 1473 - For mouthwash sampling or antigen rapid testing or parallel testing of both procedures,  
1474 with choice of participant group (Group 1, 2 or 3), including willingness for  
1475 documentation.
- 1476 - For fingertip pricks to check for SARS-CoV-2 antibodies
- 1477 - In the case of former participants in the predecessor study Wue-KiT-Ta-CoV, consent to the  
1478 transfer of information/data from the predecessor study to Wue-KiT-Ta-CoV 2.0

1479 After selecting a sample, additional consents are obtained:

- 1480 - On semi-structured interviews (sample of participants)

1481 If required, additional forms will be provided in English and Arabic.

1482

1483



1484

**1485 11.4 Usage, storage and transfer of the data**

1486

1487 All data on test persons will be collected and used only for the purpose stated in the study  
1488 protocol. Only authorized study personnel acquires and manages data in compliance with all  
1489 valid data protection regulations. The procedure for compliance with data protection  
1490 corresponds to the procedure for Wue-KiTa-CoV. This procedure has been approved by the  
1491 data protection officer of the University of Wuerzburg.

1492 Transport of study documents/samples from participating institutions to the study center will  
1493 be performed only by authorized personnel according to predetermined SOPs.

1494 In electronic form, only pseudonymized data are collected and stored. The  
1495 storage/processing of data is carried out exclusively using the technical facilities of the  
1496 University / University Hospital. This takes place on device that have appropriate password  
1497 protection and on their premises, in order to ensure the security of the data.

1498 Data will only be passed on / exchanged between named, directly involved study managers  
1499 and offices at the University of Wuerzburg and the University Hospital of Wuerzburg (UKW)  
1500 via a specially set up, password-protected exchange drive. No study data will be passed on  
1501 to third parties.

1502 Only aggregated data, which do not allow any conclusions to be drawn about the  
1503 persons/households involved are published.

1504 All study documents are kept and archived in accordance with legal requirements, and are  
1505 destroyed after the prescribed period.

1506 **12 LITERATURE**

- 1507 1. Bertonecchi D, Guidarini M, Della Greca A, et al. COVID19: potential cardiovascular issues in  
1508 pediatric patients. *Acta bio-medica: Atenei Parmensis*. 2020;91(2):177-183.
- 1509 2. Robert Koch Institut. SARS-CoV-2 Steckbrief zur Coronavirus-Krankheit-2019 (COVID-19)  
1510 [SARS-CoV-2 Coronavirus disease fact sheet 2019 (COVID-19)].  
1511 [https://www.rki.de/DE/Content/InfAZ/N/Neuartiges\\_Coronavirus/Steckbrief.html#doc137767](https://www.rki.de/DE/Content/InfAZ/N/Neuartiges_Coronavirus/Steckbrief.html#doc13776792bodyText2)  
1512 [92bodyText2](https://www.rki.de/DE/Content/InfAZ/N/Neuartiges_Coronavirus/Steckbrief.html#doc13776792bodyText2). Published 2020. Accessed 2020-07-22.
- 1513 3. Streng A, Hartmann K, Armann J, Berner R, Liese JG. [COVID-19 in hospitalized children  
1514 and adolescents]. *Monatsschr Kinderheilkd*. 2020:1-12.
- 1515 4. World Health Organisation. Coronavirus disease pandemic (COVID-19).  
1516 [https://www.euro.who.int/de/health-topics/health-emergencies/coronavirus-covid-19/novel-](https://www.euro.who.int/de/health-topics/health-emergencies/coronavirus-covid-19/novel-coronavirus-2019-ncov)  
1517 [coronavirus-2019-ncov](https://www.euro.who.int/de/health-topics/health-emergencies/coronavirus-covid-19/novel-coronavirus-2019-ncov). Published 2020. Accessed.
- 1518 5. Deutsche Akademie für Kinder- und Jugendmedizin. [German Academy of Medicine for  
1519 Children and Adolescents] Stellungnahme der Deutschen Akademie für Kinder- und  
1520 Jugendmedizin e.V. zu weiteren Einschränkungen der Lebensbedingungen von Kindern und  
1521 Jugendlichen in der Pandemie mit dem neuen Coronavirus (SARS-CoV-2). [Statement by the  
1522 German Academy of Medicine for Children and Adolescents n further restrictions on the  
1523 living conditions of children and adolescents in the pandemic with the new coronavirus  
1524 (SARS-CoV-2)] [https://www.dakj.de/stellungnahmen/stellungnahme-der-deutschen-](https://www.dakj.de/stellungnahmen/stellungnahme-der-deutschen-akademie-fuer-kinder-und-jugendmedizin-e-v-zu-weiteren-einschraenkungen-der-lebensbedingungen-von-kindern-und-jugendlichen-in-der-pandemie-mit-dem-neuen-coronavirus-sar/)  
1525 [akademie-fuer-kinder-und-jugendmedizin-e-v-zu-weiteren-einschraenkungen-der-](https://www.dakj.de/stellungnahmen/stellungnahme-der-deutschen-akademie-fuer-kinder-und-jugendmedizin-e-v-zu-weiteren-einschraenkungen-der-lebensbedingungen-von-kindern-und-jugendlichen-in-der-pandemie-mit-dem-neuen-coronavirus-sar/)  
1526 [lebensbedingungen-von-kindern-und-jugendlichen-in-der-pandemie-mit-dem-neuen-](https://www.dakj.de/stellungnahmen/stellungnahme-der-deutschen-akademie-fuer-kinder-und-jugendmedizin-e-v-zu-weiteren-einschraenkungen-der-lebensbedingungen-von-kindern-und-jugendlichen-in-der-pandemie-mit-dem-neuen-coronavirus-sar/)  
1527 [coronavirus-sar/](https://www.dakj.de/stellungnahmen/stellungnahme-der-deutschen-akademie-fuer-kinder-und-jugendmedizin-e-v-zu-weiteren-einschraenkungen-der-lebensbedingungen-von-kindern-und-jugendlichen-in-der-pandemie-mit-dem-neuen-coronavirus-sar/). Published 2020. Accessed 2020-07-18.
- 1528 6. Schober T, Rack-Hoch A, Kern A, von Both U, Hübner J. Coronakrise: Kinder haben das  
1529 Recht auf Bildung. [Covid crisis: Children have the right to education.] *Dtsch Arztebl*  
1530 *International*. 2020;117(19):990-994.
- 1531 7. Panahi L, Amiri M, Pouy S. Clinical Characteristics of COVID-19 Infection in Newborns and  
1532 Pediatrics: A Systematic Review. *Archives of academic emergency medicine*. 2020;8(1):e50.
- 1533 8. Ludvigsson JF. Systematic review of COVID-19 in children shows milder cases and a better  
1534 prognosis than adults. *Acta Paediatr*. 2020;109(6):1088-1095.
- 1535 9. Alunno A, Carubbi F, Rodríguez-Carrio J. Storm, typhoon, cyclone or hurricane in patients  
1536 with COVID-19? Beware of the same storm that has a different origin. *RMD open*. 2020;6(1).
- 1537 10. Verdoni L, Mazza A, Gervasoni A, et al. An outbreak of severe Kawasaki-like disease at the  
1538 Italian epicentre of the SARS-CoV-2 epidemic: an observational cohort study. *Lancet*.  
1539 2020;395(10239):1771-1778.
- 1540 11. Garazzino S, Montagnani C, Donà D, et al. Multicentre Italian study of SARS-CoV-2  
1541 infection in children and adolescents, preliminary data as at 10 April 2020. *Euro surveillance :  
1542 bulletin European sur les maladies transmissibles = European communicable disease bulletin*.  
1543 2020;25(18).
- 1544 12. Robert Koch Institut. COVID-19: Fallzahlen in Deutschland und weltweit. [Case numbers in  
1545 Germany and worldwide.]  
1546 [https://www.rki.de/DE/Content/InfAZ/N/Neuartiges\\_Coronavirus/Fallzahlen.html](https://www.rki.de/DE/Content/InfAZ/N/Neuartiges_Coronavirus/Fallzahlen.html). Published  
1547 2020. Accessed 2020-07-22.
- 1548 13. Danis K, Epaulard O, Bénet T, et al. Cluster of coronavirus disease 2019 (Covid-19) in the  
1549 French Alps, 2020. *Clin Infect Dis*. 2020.
- 1550 14. National Centre for Immunisation Research and Surveillance (NCIRS). COVID-19 in schools  
1551 – the experience in NSW. [http://ncirs.org.au/sites/default/files/2020-04/NCIRS%](http://ncirs.org.au/sites/default/files/2020-04/NCIRS%20NSW%20Schools%20COVID_Summary_FINAL%20public_26%20April%202020.pdf)  
1552 [20NSW%20Schools%20COVID\\_Summary\\_FINAL%20public\\_26%20April%202020.](http://ncirs.org.au/sites/default/files/2020-04/NCIRS%20NSW%20Schools%20COVID_Summary_FINAL%20public_26%20April%202020.pdf)  
1553 [pdf](http://ncirs.org.au/sites/default/files/2020-04/NCIRS%20NSW%20Schools%20COVID_Summary_FINAL%20public_26%20April%202020.pdf). Published 2020. Accessed.
- 1554 15. Gudbjartsson DF, Helgason A, Jonsson H, et al. Spread of SARS-CoV-2 in the Icelandic  
1555 Population. *New England Journal of Medicine*. 2020.
- 1556 16. Lavezzo E, Franchin E, Ciavarella C, et al. Suppression of COVID-19 outbreak in the  
1557 municipality of Vo, Italy. *medRxiv*. 2020.
- 1558 17. Mizumoto K, Omori R, Nishiura H. Age specificity of cases and attack rate of novel  
1559 coronavirus disease (COVID-19). *medRxiv*. 2020.

- 1560 18. Viner RM, Russell SJ, Croker H, et al. School closure and management practices during  
1561 coronavirus outbreaks including COVID-19: a rapid systematic review. *The Lancet Child &*  
1562 *adolescent health*. 2020;4(5):397-404.
- 1563 19. Bi Q, Wu Y, Mei S, et al. Epidemiology and transmission of COVID-19 in 391 cases and  
1564 1286 of their close contacts in Shenzhen, China: a retrospective cohort study. *The Lancet*  
1565 *Infectious diseases*. 2020.
- 1566 20. Fontanet A, Tondeur L, Madec Y, et al. Cluster of COVID-19 in northern France: A  
1567 retrospective closed cohort study. *medRxiv*. 2020.
- 1568 21. Terry C. Jones BM, Talitha Veith, Marta Zuchowski, Jörg Hofmann, Angela Stein, Anke  
1569 Edelmann, Victor Max Corman, Christian Drosten. An analysis of SARS-CoV-2 viral load by  
1570 patient age. [https://zoonosen.charite.de/fileadmin/user\\_upload/microsites/m\\_cc05/virologie-  
1571 ccm/dateien\\_upload/Weitere\\_Dateien/analysis-of-SARS-CoV-2-viral-load-by-patient-age.pdf](https://zoonosen.charite.de/fileadmin/user_upload/microsites/m_cc05/virologie-ccm/dateien_upload/Weitere_Dateien/analysis-of-SARS-CoV-2-viral-load-by-patient-age.pdf).  
1572 Published 2020. Accessed.
- 1573 22. Brauner JM, Mindermann S, Sharma M, et al. The effectivity and perceived burden of  
1574 nonpharmaceutical interventions against COVID-19 transmission: a modelling study with 41  
1575 countries. *medRxiv*. 2020.
- 1576 23. Achenbach TM. *The Achenbach system of empirically based assessment (ASEBA):*  
1577 *Development, findings, theory, and applications*. University of Vermont, Research Center for  
1578 Children, Youth, & Families; 2009.
- 1579 24. EuroQol. EuroQol--a new facility for the measurement of health-related quality of life. *Health*  
1580 *policy (Amsterdam, Netherlands)*. 1990;16(3):199-208.
- 1581 25. Löwe B, Wahl I, Rose M, et al. A 4-item measure of depression and anxiety: validation and  
1582 standardization of the Patient Health Questionnaire-4 (PHQ-4) in the general population.  
1583 *Journal of affective disorders*. 2010;122(1-2):86-95.
- 1584 26. Kuckartz U. *Qualitative Inhaltsanalyse: Methoden, Praxis, Computerunterstützung.*  
1585 *[Qualitative content analysis: Methods, practice, computer support.]* Weinheim: Beltz-  
1586 Juventa; 2012.
- 1587 27. Moser A, Korstjens I. Series: Practical guidance to qualitative research. Part 3: Sampling, data  
1588 collection and analysis. *European Journal of General Practice*. 2018;24(1):9-18.
- 1589 28. Guest G, Bunce A, Johnson L. How Many Interviews Are Enough?: An Experiment with Data  
1590 Saturation and Variability. *Field Methods*. 2006;18(1):59-82.
- 1591 29. World Health Organization. *WHO guidelines on drawing blood: best practices in phlebotomy*.  
1592 World Health Organization; 2010.

1593

1594

1595

---

## 1596 13 APPENDIX

### 1597 13.1 Participant information

- 1598 - *Information for parents/custodians*
- 1599 - *Information for child care staff*

### 1600 13.2 Declaration of consent

- 1601 - *Consent for parents/custodians*
- 1602 - *Consent for child care staff*

### 1603 13.3 Survey tools

#### 1604 Survey on all participants

- 1605 - *Initial survey of basal demographic data (consent, online interview Week 1)*
- 1606 - *Psychosocial questionnaires (online interviews Week 1, Week 12)*
- 1607 - *Children interviews (online interviews Week 1, Week 12)*
- 1608 - *Recording of intended/performed sample collections (weekly online interviews)*

1609

#### 1610 Other surveys (in preparation)

- 1611 - *Structured interviews (on the basis of a guideline; survey only for random sample)*
- 1612 - *Recording of cost factors (material, personnel and required time)*
- 1613 - *Daycare center interview (including number of children, group size, SARS-CoV-2-related hygiene measures; weekly aggregated figures on absences of daycare center children and child care staff).*

1614

### 1615 13.4 Further information material

1616 *(in preparation)*

- 1617 • Postings in the daycare centers
- 1618 • Information flyer for parents
- 1619 • Power point presentation for information events
- 1620 • Study website with videos (instruction for sample collection by parents)

1621

1622

1623

1624

1625
