# Supplementary material for: Acceptance of Different Self-sampling Methods for Semiweekly SARS-CoV-2 Testing in Asymptomatic Children and Childcare Workers at German Day Care Centers: A Nonrandomized Controlled Trial
Source: PubMed Central journal article supplement (PMC9478779; doi:10.1001/jamanetworkopen.2022.31798), 2022-09-15
Supplement: jamanetwopen-e2231798-s002.pdf [file jamanetwopen-e2231798-s002.pdf]

## Supplemental Online Content

Engels G, Forster J, Streng A, et al; Wue-KiTā-CoV 2.0-Study Group. Acceptance of different self-sampling methods for semiweekly SARS-CoV-2 testing in asymptomatic children and childcare workers at German day care centers: a nonrandomized controlled trial. *JAMA Netw Open*. 2022;5(9):e2231798.  
doi:10.1001/jamanetworkopen.2022.31798

### **eAppendix 1.** Supplemental Methods

### **eAppendix 2.** Supplemental Results

**eTable 1.** Sociodemographic Characteristics of Participating Children and Parents, Attitudes Toward the Pandemic/Experience of Testing/Perception of Health Burden of the Pandemic, Week 1

**eTable 2.** Sociodemographic Characteristics of Participating Childcare Workers, Attitudes Toward the Pandemic/Experience of Self-testing/Perception of Health Burden of the Pandemic, Week 1

**eTable 3.** Comparison of Children's Health Status/Readiness to Participate and Parents' Perceptions of Respiratory Surveillance Measures/Attitudes Toward the Pandemic at Weeks 1 and 12

**eTable 4.** Comparison of Perceptions of Respiratory Surveillance Measures and Attitudes Toward the Pandemic of Participating Childcare Workers at Weeks 1 and 12

**eTable 5.** Factors Influencing Children's Unsuccessful Long-term Participation

**eTable 6.** Factors Influencing Successful Participation of Childcare Workers

**eFigure 1.** Flow Diagram

**eFigure 2.** Age-Adjusted Incidences in the City and District of Wuerzburg for the DCC-Relevant Age Group (2-6 Years; Orange) and Corresponding Incidences Among Children in all 69 DCCs (Blue) During the Study Period

**eReferences.**

## **eAppendix 1. Supplemental Methods**

### **Material and testing procedures**

**SARS-CoV-2 PCR.** Saliva specimens were transferred to the central laboratory and analysed in pools of a maximum of 8 samples (100µl of each specimen). A retention sample was stored. SARS-CoV-2 nucleic acid testing was performed using CE certified tests (Cobas 6800 [Roche], Alinity M [Abott], NeuMoDx [Qiagen], BDmax [Becton Dickinson]). In the event of a positive or unclear pool result, the retention sample was analysed. Positive results were reported on the day of sampling.

**SARS-CoV-2 antigen rapid self-tests.** AST (AESKU.RAPID SARS-CoV-2 Rapid Test, Wendelsheim, Germany) kits and instructions were distributed to the participants in group 1 and group 3. The AgRTs were carried out at home using nasal atrium swabs performed in the morning by parents on their children or self-administered by CCWs and documented by parents/CCWs using an online tool developed for the study. Participants were instructed to stay at home and contact the study site for additional PCR testing in the event of a positive test result.

**SARS-CoV-2 antibody testing.** Before and after the period of continuous testing, study participants were tested for SARS-CoV-2 IgG antibody status. For children who had participated in our previous surveillance study<sup>1</sup> and for whom serological testing results were available from the end of the prior study, those results were included in the present study and additional serological testing was offered only at week 12. A finger-prick test was performed at the DCCs by medical personnel and analysed by point-of-care testing (Panbio COVID-19 IgG/IgM Rapid Test, Abbott, North Chicago, USA). In the event of a positive point-of-care test result, full serology testing was offered to all participants using SERION ELISA agile SARS-CoV-2 (Institut Virion/Serion, Wuerzburg, Germany, target: SARS-CoV-2 spike protein) and Elecsys Anti-SARS-CoV-2 (Hoffmann-La Roche AG, Basel, Switzerland, target: SARS-CoV-2 nucleocapsid)<sup>2</sup>. All IgG positive samples from finger-prick or venous samples were considered indicative of a previous SARS-CoV-2 infection.

### **Questionnaires and interviews**

The questionnaires used included the Children with Special Health Care Needs (CSHCN) - Screener<sup>3</sup>, the subscale "anxious/depressed" of the German version of the Child Behaviour Checklist 1.5-5<sup>4</sup> and the Patient Health Questionnaire-4 (PHQ-4). For a more detailed description, we refer to Forster et al<sup>1</sup>.

### **Statistical analysis**

### Univariable and multivariable logistic regression analysis

To account for data dependencies within families, univariable and multivariable generalized estimation equations (GEE) with random effects for families were used in the analyses to determine factors associated with unsuccessful participation of children. Two models were built. Model 1 included allocation to study group and those baseline characteristics that were significant at a significance level of 10% in univariable analyses as well as baseline characteristics that were considered as potential predictors from a contextual perspective. Model 2 combined baseline characteristics with the attitude towards SARS-CoV-2 (sum score of variables measuring “anxiety about COVID” [maximum sum score 12, cut off value >6]). Successful participation was pre-defined as at least 60% of all scheduled respiratory samples being taken (excluding sick days, holidays etc). Similar to the method used in the analyses of the children’s data, multivariable logistic regression was used to model factors associated with unsuccessful participation of CCWs.

### Sample size discussion

The maximum achievable sample size was limited by the number of children and CCWs in the pre-selected nine DCCs. We assumed a number of 650 eligible children and an initial participation rate of 67%, which could be estimated with a precision of 3.7% (half-width of the Score-Wilson 95%-CI). Assuming a number of 180 CCWs and an initial acceptance rate of 86%, the acceptance rate could be estimated with a precision of 5.3%.

### Modelling

We adjusted incidences reported for the city and district of Wuerzburg to the DCC-relevant age group 2 – 6 years and compared these age-adjusted incidences with the incidences among children in all 69 DCCs during the study period. As can be seen in **eFigure 2**, the incidence rates for the city and district of Wuerzburg represent an upper limit to the incidences reported for children attending the DCCs, an observation which can be interpreted as the effect of restricting access of symptomatic children to DCCs. Thus, the incidence rates for the city and district of Wuerzburg can be interpreted as a worst-case-scenario for DCC incidences and can be used as a basis for deriving a reference point at which testing becomes reasonable. We assume that the probability of the introduction of a primary infection is homogenous across children and depends on the age-adjusted incidence. For modelling the probability

that at least one primary infection occurs, we use a disease occurrence model based on a binomial distribution<sup>5</sup>:

$$P(X > 0) = 1 - P(X = 0) = 1 - \left(1 - \frac{p}{7 \cdot 100,000}\right)^{N \cdot d}$$

where  $N$  is the cohort size of the DCC,  $p$  the age-adjusted 7-day incidence and  $d$  the duration in which the occurrence of infections is to be modelled. It should be noted that we are only interested in primary infections and do not apply this model to transmission effects inside a DCC. **Figure 3** illustrates how the age-adjusted incidence affects the probability that at least one positive child is introduced as a primary infection case in a DCC. For example, for a DCC size of 50, 75 or 100 children, if the age-adjusted incidence is below 143, 95 and 71, respectively, the probability that at least one primary infected child will enter the DCC during the week ( $d = 5$ ) is at most 5%.

## **eAppendix 2. Supplemental Results**

### **Sociodemographic characteristics of participants and initial attitude towards the pandemic**

#### Children/parents

Full data on participating children and parents are provided in **eTable 1**.

Of the participating parents, 78.0% (252/323) had completed school at university entrance level. The most frequent household size was 4 persons (median; IQR 3-4). The majority of the responding parents were in employment, either part-time (46.1%; 147/319) or full-time (30.1%; 96/319); in 78.5% (237/302) of all participating households, all adults were in employment. Of all participating households, 19.5% (63/323) included at least one person with a chronic health condition.

Initially, 24% of the parents felt strongly affected by their fear of transmitting a potential SARS-CoV-2 infection to other persons and 16% feared that they might develop a severe course of COVID-19 in the event of an infection. Only 6% stated that they had critical/very critical views towards the planned DCC surveillance of their children; 12% declared that they feared negative consequences of the planned DCC surveillance for their family. Regarding their attitudes towards vaccinations in general, 94% of the parents considered vaccinations as fairly/very important.

There were only few significant differences between the three study groups. In group 1, the number of children per household was slightly larger ( $p=.016$ ) than in group 2 or group 3, the parents' willingness to have their children vaccinated against SARS-CoV-2 was higher (66.5% vs. 45.7% and 50.0%;  $p=.005$ ), a higher proportion considered testing of children as rather/very useful (group 1 90.9% vs. groups 2/3 78.9%/80.4%,  $p=.001$ ) and their attitude towards the planned measures in the DCC was more often positive ("rather/very positive" group 1 88.2% vs. groups 2/3 65.7%/66.6%;  $p<.001$ ).

#### CCWs

Full data on participating CCWs are provided in **eTable 2**.

Of responding CCWs, 54.5% (60/110 with available information) had completed school at university entrance level and 57.8% (63/109) lived in households with 1-2 persons. Approximately one fifth (21.8%; 24/110) of CCWs reported a chronic health condition for themselves and 18.3% (20/109) for another household member. Questionnaires for week 1 were available for 112 of 139 CCWs. Of these 112

CCWs, 57% felt strongly affected by the fear of transmitting a potential SARS-CoV-2 infection to others and 30% reported fear of developing a severe course of COVID-19 themselves. Government-mandated restrictive measures were classed as fairly/very important by 68% of participating CCWs. Only 10% stated fairly strong or strong fear of potential negative effects of the planned surveillance measures.

### **Change of attitude and vaccination status during the course of the study**

#### Parents

From week 1 to week 12, the proportion of parents vaccinated against SARS-CoV-2 increased from 37% to 80% ( $p < .001$ ). Correspondingly, the proportion of parents considering SARS-CoV-2 as dangerous for themselves and their families ( $p = .013$ ) or for society ( $p < .001$ ) decreased. Compared to week 1, significantly fewer parents felt limited in their personal lives ( $p < .001$ ) or concerned regarding potential negative impacts of the testing measures on their families ( $p < .001$ ). They were also less fearful regarding their own health, the risk of SARS-CoV-2 infection or severe disease and the risk of infecting others (all  $p = .005$  or lower). In contrast, there was no change in parents' opinions regarding the need for restrictive measures by the state ( $p = .508$ ) or the impact of the respiratory surveillance on their sense of safety regarding SARS-CoV-2 infections ( $p = .332$ ).

#### CCWs

In week 12, 70.3% (45/64) of participating CCWs reported that they were vaccinated against SARS-CoV-2. Compared to week 1, at week 12 fewer CCWs considered SARS-CoV-2 a danger for themselves/their families ( $p = .001$ ; week 1: 62.9% [39/62]; week 12: 37.1% [23/62]) or for society ( $p = .039$ ; week 1: 79% [49/62]; week 12: 66.1% [41/62]) and fewer CCWs felt restricted in their personal lives due to the pandemic ( $p = .011$ ; week 1: 66.1% [41/62]; week 12: 41.9% [26/62]). By week 12, a higher proportion of CCWs did not feel affected by worries of becoming infected with SARS-CoV-2 ( $p = 0.010$ ; week 1: 16.1% [10/62]; week 12: 27.4% [17/62]), of developing a severe course of COVID-19 disease ( $p = .041$ ; week 1: 21.7% [13/60]; week 12: 30% [18/60]), of receiving inadequate treatment for the disease ( $p = .040$ ; week 1: 35.5% [22/62]; week 12: 53.2% [33/62]) or of infecting other people ( $p < .001$ ; week 1: 6.5% [4/62]; week 12: 17.7% [11/62]). Of all participating CCWs with available data, 19.2% (20/104) initially showed an elevated PHQ4 score for anxiety / depression; in 40% (4/10) of those

CCWs with initially elevated PHQ4 values and available data for week 12, the PHQ4 score had decreased to normal values (not significant;  $p=.289$ ).

**eTable 1. Sociodemographic Characteristics of Participating Children and Parents, Attitudes Toward the Pandemic/Experience of Testing/Perception of Health Burden of the Pandemic, Week 1**

N=total, SAL=saliva (mouthwash) samples, AgRT=rapid antigen self-test, CSHCN=Children with Special Health Care Needs-Screener, CBCL=Child Behavior Checklist, PHQ-4=Patient Health Questionnaire 4.

| <i>Children/Parents</i>                           | <b>All participants</b> |                            | <b>Group 1 (SAL + AgRT)</b> |                            | <b>Group 2 (SAL)</b> |                            | <b>Group 3 (AgRT)</b> |                            | <b>p-value</b> |
|---------------------------------------------------|-------------------------|----------------------------|-----------------------------|----------------------------|----------------------|----------------------------|-----------------------|----------------------------|----------------|
|                                                   | <b>N</b>                | <b>n (%) or Median IQR</b> | <b>N</b>                    | <b>n (%) or Median IQR</b> | <b>N</b>             | <b>n (%) or Median IQR</b> | <b>N</b>              | <b>n (%) or Median IQR</b> |                |
| <b>Socio-demographic data</b>                     |                         |                            |                             |                            |                      |                            |                       |                            |                |
| <b>Children</b>                                   |                         |                            |                             |                            |                      |                            |                       |                            |                |
| Age, median (IQR)                                 | 452                     | 4 (3-5)                    | 215                         | 4 (3-5)                    | 172                  | 4 (3-5)                    | 65                    | 3 (2-4)                    | <0.0001        |
| Female, n(%)                                      | 452                     | 213 (47.1)                 | 215                         | 94 (43.7)                  | 172                  | 88 (51.2)                  | 65                    | 31 (47.7)                  | 0.3441         |
| Chronic health conditions (any), n(%)             | 373                     | 51 (13.7)                  | 193                         | 29 (15)                    | 125                  | 14 (11.2)                  | 55                    | 8 (14.5)                   | 0.6119         |
| German nationality, n(%)                          | 364                     | 353 (97)                   | 187                         | 184 (98.4)                 | 123                  | 116 (94.3)                 | 54                    | 53 (98.1)                  | 0.1041         |
| CSHCN above normal                                | 369                     | 26 (7)                     | 190                         | 16 (8.4)                   | 124                  | 4 (3.2)                    | 55                    | 6 (10.9)                   | 0.1020         |
| CBCL above normal                                 | 361                     | 30 (8.3)                   | 188                         | 15 (8)                     | 119                  | 8 (6.7)                    | 54                    | 7 (13)                     | 0.3763         |
| <b>Parents</b>                                    |                         |                            |                             |                            |                      |                            |                       |                            |                |
| Age, median (IQR)                                 | 322                     | 38 (34-40)                 | 173                         | 38 (36-41)                 | 104                  | 37 (34-40)                 | 45                    | 36 (32-39)                 | 0.0500         |
| Female, n(%)                                      | 323                     | 237 (73.4)                 | 173                         | 125 (72.3)                 | 104                  | 77 (74)                    | 46                    | 35 (76.1)                  | 0.8573         |
| School education, n(%)                            | 323                     |                            | 174                         |                            | 103                  |                            | 46                    |                            | 0.1865         |
| None                                              |                         | 1 (0.3)                    |                             | 0 (0.0)                    |                      | 1 (1.0)                    |                       | 0 (0.0)                    |                |
| Lower secondary level / basic                     |                         | 20 (6.2)                   |                             | 10 (5.7)                   |                      | 6 (5.8)                    |                       | 4 (8.7)                    |                |
| Lower secondary level/ advanced                   |                         | 50 (15.5)                  |                             | 21 (12.1)                  |                      | 17 (16.5)                  |                       | 12 (26.1)                  |                |
| Upper secondary level (University entrance level) |                         | 252 (78)                   |                             | 143 (82.2)                 |                      | 79 (76.7)                  |                       | 30 (65.2)                  |                |
| Employment status, n(%)                           | 319                     |                            | 172                         |                            | 102                  |                            | 45                    |                            | 0.9617         |
| Employed/ full-time                               |                         | 96 (30.1)                  |                             | 54 (31.4)                  |                      | 31 (30.4)                  |                       | 11 (24.4)                  |                |



|                                                                     |     |               |     |               |     |              |    |              |            |
|---------------------------------------------------------------------|-----|---------------|-----|---------------|-----|--------------|----|--------------|------------|
| Employed/ part-time                                                 |     | 147<br>(46.1) |     | 76<br>(44.2)  |     | 48<br>(47.1) |    | 23<br>(51.1) |            |
| Self-employed                                                       |     | 14<br>(4.4)   |     | 8 (4.7)       |     | 5 (4.9)      |    | 1 (2.2)      |            |
| Unemployed                                                          |     | 24<br>(7.5)   |     | 13<br>(7.6)   |     | 8 (7.8)      |    | 3 (6.7)      |            |
| Importance of childcare access in daily life, n(%)                  | 325 |               | 174 |               | 105 |              | 46 |              | 0.168<br>2 |
| Not at all                                                          |     | 2 (0.6)       |     | 2 (1.1)       |     | 0 (0.0)      |    | 0 (0.0)      |            |
| Somewhat                                                            |     | 10<br>(3.1)   |     | 4 (2.3)       |     | 5 (4.8)      |    | 1 (2.2)      |            |
| Moderately                                                          |     | 32<br>(9.8)   |     | 21<br>(12.1)  |     | 8 (7.6)      |    | 3 (6.5)      |            |
| Fairly                                                              |     | 94<br>(28.9)  |     | 41<br>(23.6)  |     | 40<br>(38.1) |    | 13<br>(28.3) |            |
| Very                                                                |     | 187<br>(57.5) |     | 106<br>(60.9) |     | 52<br>(49.5) |    | 29<br>(63)   |            |
| Number of persons per household, median (IQR)                       | 324 | 4 (3-4)       | 173 | 4 (4-4)       | 105 | 4 (3-4)      | 46 | 4 (3-4)      | 0.241<br>5 |
| Adults                                                              | 321 | 2 (2-2)       | 171 | 2 (2-2)       | 104 | 2 (2-2)      | 46 | 2 (2-2)      | 0.078<br>1 |
| Children                                                            | 322 | 2 (1-2)       | 172 | 2 (2-2)       | 104 | 2 (1-2)      | 46 | 2 (1-2)      | 0.015<br>7 |
| In households with more than one adult: all adults in employment    | 302 | 237<br>(78.5) | 158 | 121<br>(76.6) | 99  | 82<br>(82.8) | 45 | 34<br>(75.6) | 0.433<br>2 |
| At least one household member with a long-term or chronic illness   | 323 | 63<br>(19.5)  | 173 | 35<br>(20.2)  | 104 | 15<br>(14.4) | 46 | 13<br>(28.3) | 0.134<br>3 |
| <b>Attitudes towards/experiences with SARS-CoV-2 or vaccination</b> |     |               |     |               |     |              |    |              |            |
| How dangerous do you think SARS-CoV-2 is for you/your family? n(%)  | 323 |               | 174 |               | 103 |              | 46 |              | 0.657<br>1 |
| Not at all                                                          |     | 13<br>(4.0)   |     | 7 (4.0)       |     | 5 (4.9)      |    | 1 (2.2)      |            |
| Somewhat                                                            |     | 33<br>(10.2)  |     | 20<br>(11.5)  |     | 11<br>(10.7) |    | 2 (4.3)      |            |
| Moderately                                                          |     | 161<br>(49.8) |     | 80 (46)       |     | 53<br>(51.5) |    | 28<br>(60.9) |            |
| Fairly                                                              |     | 90<br>(27.9)  |     | 53<br>(30.5)  |     | 27<br>(26.2) |    | 10<br>(21.7) |            |
| Very                                                                |     | 26<br>(8.0)   |     | 14<br>(8.0)   |     | 7 (6.8)      |    | 5<br>(10.9)  |            |
| How dangerous do you think SARS-CoV-2 is for society? n(%)          | 324 |               | 174 |               | 104 |              | 46 |              | 0.121<br>1 |
| Not at all                                                          |     | 4 (1.2)       |     | 1 (0.6)       |     | 3 (2.9)      |    | 0 (0.0)      |            |

|                                                                                                                                        |     |               |     |               |     |              |    |              |            |
|----------------------------------------------------------------------------------------------------------------------------------------|-----|---------------|-----|---------------|-----|--------------|----|--------------|------------|
| Somewhat                                                                                                                               |     | 12<br>(3.7)   |     | 2 (1.1)       |     | 6 (5.8)      |    | 4 (8.7)      |            |
| Moderately                                                                                                                             |     | 61<br>(18.8)  |     | 30<br>(17.2)  |     | 22<br>(21.2) |    | 9<br>(19.6)  |            |
| Fairly                                                                                                                                 |     | 174<br>(53.7) |     | 100<br>(57.5) |     | 50<br>(48.1) |    | 24<br>(52.2) |            |
| Very                                                                                                                                   |     | 73<br>(22.5)  |     | 41<br>(23.6)  |     | 23<br>(22.1) |    | 9<br>(19.6)  |            |
| I personally know someone (family/friends/acquaintances) who tested positive for/was ill with/died of SARS-COV-2. n(%)                 | 325 | 277<br>(85.2) | 174 | 148<br>(85.1) | 105 | 90<br>(85.7) | 46 | 39<br>(84.8) | 0.984<br>6 |
| How important do you think government-mandated restrictive measures to control SARS-CoV-2 are? n (%)                                   | 323 |               | 174 |               | 103 |              | 46 |              | 0.069<br>8 |
| Not at all                                                                                                                             |     | 3 (0.9)       |     | 1 (0.6)       |     | 2 (1.9)      |    | 0 (0.0)      |            |
| Somewhat                                                                                                                               |     | 12<br>(3.7)   |     | 4 (2.3)       |     | 6 (5.8)      |    | 2 (4.3)      |            |
| Moderately                                                                                                                             |     | 51<br>(15.8)  |     | 19<br>(10.9)  |     | 23<br>(22.3) |    | 9<br>(19.6)  |            |
| Fairly                                                                                                                                 |     | 124<br>(38.4) |     | 68<br>(39.1)  |     | 35<br>(34.0) |    | 21<br>(45.7) |            |
| Very                                                                                                                                   |     | 133<br>(41.2) |     | 82<br>(47.1)  |     | 37<br>(35.9) |    | 14<br>(30.4) |            |
| To what extent do you currently feel limited in your personal life by SARS-CoV-2? n (%)                                                | 324 |               | 174 |               | 104 |              | 46 |              | 0.420<br>5 |
| Not at all                                                                                                                             |     | 2 (0.6)       |     | 1 (0.6)       |     | 1 (1.0)      |    | 0 (0.0)      |            |
| Somewhat                                                                                                                               |     | 18<br>(5.6)   |     | 9 (5.2)       |     | 6 (5.8)      |    | 3 (6.5)      |            |
| Moderately                                                                                                                             |     | 118<br>(36.4) |     | 62<br>(35.6)  |     | 38<br>(36.5) |    | 18<br>(39.1) |            |
| Fairly                                                                                                                                 |     | 130<br>(40.1) |     | 79<br>(45.4)  |     | 38<br>(36.5) |    | 13<br>(28.3) |            |
| Very                                                                                                                                   |     | 56<br>(17.3)  |     | 23<br>(13.2)  |     | 21<br>(20.2) |    | 12<br>(26.1) |            |
| Supposing the coronavirus vaccine was approved for children, would you generally be willing to have your child or children vaccinated? | 324 |               | 173 |               | 105 |              | 46 |              | 0.004<br>7 |
| No                                                                                                                                     |     | 33<br>(10.2)  |     | 12<br>(6.9)   |     | 17<br>(16.2) |    | 4 (8.7)      |            |

|                                                                                                                                                                                                            |     |               |     |               |     |              |    |              |            |
|------------------------------------------------------------------------------------------------------------------------------------------------------------------------------------------------------------|-----|---------------|-----|---------------|-----|--------------|----|--------------|------------|
| Yes                                                                                                                                                                                                        |     | 186<br>(57.4) |     | 115<br>(66.5) |     | 48<br>(45.7) |    | 23<br>(50.0) |            |
| I do not know                                                                                                                                                                                              |     | 105<br>(32.4) |     | 46<br>(26.6)  |     | 40<br>(38.1) |    | 19<br>(41.3) |            |
| How important do you consider vaccinations in general? n (%)                                                                                                                                               | 325 |               | 174 |               | 105 |              | 46 |              | 0.094<br>6 |
| Not at all                                                                                                                                                                                                 |     | 1 (0.3)       |     | 0 (0.0)       |     | 1 (1.0)      |    | 0 (0.0)      |            |
| Somewhat                                                                                                                                                                                                   |     | 4 (1.2)       |     | 2 (1.1)       |     | 2 (1.9)      |    | 0 (0.0)      |            |
| Moderately                                                                                                                                                                                                 |     | 16<br>(4.9)   |     | 4 (2.3)       |     | 9 (8.6)      |    | 3 (6.5)      |            |
| Fairly                                                                                                                                                                                                     |     | 50<br>(15.4)  |     | 21<br>(12.1)  |     | 21<br>(20)   |    | 8<br>(17.4)  |            |
| Very                                                                                                                                                                                                       |     | 254<br>(78.2) |     | 147<br>(84.5) |     | 72<br>(68.6) |    | 35<br>(76.1) |            |
| Are you willing to be vaccinated against the coronavirus?                                                                                                                                                  | 325 |               | 174 |               | 105 |              | 46 |              | 0.038<br>1 |
| No                                                                                                                                                                                                         |     | 12<br>(3.7)   |     | 6 (3.4)       |     | 4 (3.8)      |    | 2 (4.3)      |            |
| Yes                                                                                                                                                                                                        |     | 168<br>(51.7) |     | 90<br>(51.7)  |     | 57<br>(54.3) |    | 21<br>(45.7) |            |
| I have already been vaccinated                                                                                                                                                                             |     | 120<br>(36.9) |     | 68<br>(39.1)  |     | 31<br>(29.5) |    | 21<br>(45.7) |            |
| I have previously had a laboratory- confirmed coronavirus infection                                                                                                                                        |     | 7 (2.2)       |     | 6 (3.4)       |     | 1 (1.0)      |    |              |            |
| I do not know                                                                                                                                                                                              |     | 18<br>(5.5)   |     | 4 (2.3)       |     | 12<br>(11.4) |    | 2 (4.3)      |            |
| <b>Children's willingness to participate</b>                                                                                                                                                               |     |               |     |               |     |              |    |              |            |
| How well did your child participate? (SAL)<br>Scale 1-5<br><br>(only for children with at least 1 SAL sample in week 1) | 190 |               | 116 |               | 74  |              |    |              | 0.242<br>3 |
| 1                                                                                                                                                                                                          |     | 1 (0.5)       |     | 1 (0.9)       |     | 0 (0.0)      | .  |              |            |
| 2                                                                                                                                                                                                          |     | 3 (1.6)       |     | 1 (0.9)       |     | 2 (2.7)      | .  |              |            |
| 3                                                                                                                                                                                                          |     | 14<br>(7.4)   |     | 6 (5.2)       |     | 8<br>(10.8)  | .  |              |            |
| 4                                                                                                                                                                                                          |     | 33<br>(17.4)  |     | 24<br>(20.7)  |     | 9<br>(12.2)  | .  |              |            |
| 5                                                                                                                                                                                                          |     | 139<br>(73.2) |     | 84<br>(72.4)  |     | 55<br>(74.3) | .  |              |            |
| To what extent did your child like participating? (SAI)                                                                                                                                                    | 213 |               | 133 |               | 80  |              |    |              | 0.847<br>3 |

|                                                                         |     |            |     |           |     |           |    |           |        |
|-------------------------------------------------------------------------|-----|------------|-----|-----------|-----|-----------|----|-----------|--------|
| 1                                                                       |     | 5 (2.3)    |     | 4 (3)     |     | 1 (1.3)   | .  |           |        |
| 2                                                                       |     | 7 (3.3)    |     | 5 (3.8)   |     | 2 (2.5)   | .  |           |        |
| 3                                                                       |     | 20 (9.4)   |     | 12 (9.0)  |     | 8 (10.0)  | .  |           |        |
| 4                                                                       |     | 63 (29.6)  |     | 37 (27.8) |     | 26 (32.5) | .  |           |        |
| 5                                                                       |     | 118 (55.4) |     | 75 (56.4) |     | 43 (53.8) | .  |           |        |
| How well did your child participate? (AgRT) 1-5                         | 158 |            | 117 |           |     |           | 41 |           | 0.0276 |
| 1                                                                       |     | 10 (6.3)   |     | 4 (3.4)   | .   |           |    | 6 (14.6)  |        |
| 2                                                                       |     | 28 (17.7)  |     | 17 (14.5) | .   |           |    | 11 (26.8) |        |
| 3                                                                       |     | 42 (26.6)  |     | 34 (29.1) | .   |           |    | 8 (19.5)  |        |
| 4                                                                       |     | 36 (22.8)  |     | 29 (24.8) | .   |           |    | 7 (17.1)  |        |
| 5                                                                       |     | 42 (26.6)  |     | 33 (28.2) | .   |           |    | 9 (22)    |        |
| To what extent did your child like participating? (AgRT) 1-5            | 175 |            | 128 |           |     |           | 47 |           | 0.9141 |
| 1                                                                       |     | 23 (13.1)  |     | 16 (12.5) | .   |           |    | 7 (14.9)  |        |
| 2                                                                       |     | 47 (26.9)  |     | 33 (25.8) | .   |           |    | 14 (29.8) |        |
| 3                                                                       |     | 46 (26.3)  |     | 36 (28.1) | .   |           |    | 10 (21.3) |        |
| 4                                                                       |     | 37 (21.1)  |     | 27 (21.1) | .   |           |    | 10 (21.3) |        |
| 5                                                                       |     | 22 (12.6)  |     | 16 (12.5) | .   |           |    | 6 (12.8)  |        |
| <b>Assessment/Evaluation of the test measures</b>                       |     |            |     |           |     |           |    |           |        |
| How useful do you think testing children for coronavirus infections is? | 324 |            | 174 |           | 104 |           | 46 |           | 0.0009 |
| Not at all                                                              |     | 3 (0.9)    |     | 3 (1.7)   |     |           |    |           |        |
| Somewhat                                                                |     | 4 (1.2)    |     | 0 (0.0)   |     | 1 (1.0)   |    | 3 (6.5)   |        |
| Moderately                                                              |     | 40 (12.3)  |     | 13 (7.5)  |     | 21 (20.2) |    | 6 (13.0)  |        |
| Fairly                                                                  |     | 150 (46.3) |     | 81 (46.6) |     | 47 (45.2) |    | 22 (47.8) |        |
| Very                                                                    |     | 127 (39.2) |     | 77 (44.3) |     | 35 (33.7) |    | 15 (32.6) |        |

|                                                                                                                  |     |               |     |               |     |              |    |              |        |
|------------------------------------------------------------------------------------------------------------------|-----|---------------|-----|---------------|-----|--------------|----|--------------|--------|
| How would you rate the frequency of testing, 2 days per week?                                                    | 325 |               | 174 |               | 105 |              | 46 |              | 0.5877 |
| Not often enough                                                                                                 |     | 17<br>(5.2)   |     | 10<br>(5.7)   |     | 5 (4.8)      |    | 2 (4.3)      |        |
| Appropriate                                                                                                      |     | 284<br>(87.4) |     | 152<br>(87.4) |     | 94<br>(89.5) |    | 38<br>(82.6) |        |
| Too often                                                                                                        |     | 24<br>(7.4)   |     | 12<br>(6.9)   |     | 6 (5.7)      |    | 6 (13)       |        |
| How satisfied are you with doing the testing yourself?                                                           | 324 |               | 173 |               | 105 |              | 46 |              | 0.0009 |
| Not at all                                                                                                       |     | 5 (1.5)       |     | 2 (1.2)       |     | 0 (0.0)      |    | 3 (6.5)      |        |
| Somewhat                                                                                                         |     | 5 (1.5)       |     | 1 (0.6)       |     | 2 (1.9)      |    | 2 (4.3)      |        |
| Moderately                                                                                                       |     | 49<br>(15.1)  |     | 27<br>(15.6)  |     | 9 (8.6)      |    | 13<br>(28.3) |        |
| Fairly                                                                                                           |     | 141<br>(43.5) |     | 73<br>(42.2)  |     | 49<br>(46.7) |    | 19<br>(41.3) |        |
| Very                                                                                                             |     | 124<br>(38.3) |     | 70<br>(40.5)  |     | 45<br>(42.9) |    | 9<br>(19.6)  |        |
| How does testing affect your sense of safety -- that you are protecting yourself and your family from infection? | 323 |               | 174 |               | 103 |              | 46 |              | 0.6378 |
| Not at all                                                                                                       |     | 10<br>(3.1)   |     | 5 (2.9)       |     | 5 (4.9)      |    | 0 (0.0)      |        |
| Somewhat                                                                                                         |     | 21<br>(6.5)   |     | 14 (8)        |     | 4 (3.9)      |    | 3 (6.5)      |        |
| Moderately                                                                                                       |     | 70<br>(21.7)  |     | 34<br>(19.5)  |     | 26<br>(25.2) |    | 10<br>(21.7) |        |
| Fairly                                                                                                           |     | 164<br>(50.8) |     | 87<br>(50.0)  |     | 51<br>(49.5) |    | 26<br>(56.5) |        |
| Very                                                                                                             |     | 58<br>(18)    |     | 34<br>(19.5)  |     | 17<br>(16.5) |    | 7<br>(15.2)  |        |
| How stressful is the testing experience for yourself?                                                            | 319 |               | 171 |               | 102 |              | 46 |              | 0.0132 |
| Not at all                                                                                                       |     | 122<br>(38.2) |     | 67<br>(39.2)  |     | 49<br>(48.0) |    | 6<br>(13.0)  |        |
| Somewhat                                                                                                         |     | 130<br>(40.8) |     | 68<br>(39.8)  |     | 35<br>(34.3) |    | 27<br>(58.7) |        |
| Moderately                                                                                                       |     | 51<br>(16.0)  |     | 29<br>(17.0)  |     | 13<br>(12.7) |    | 9<br>(19.6)  |        |
| Fairly                                                                                                           |     | 14<br>(4.4)   |     | 6 (3.5)       |     | 5 (4.9)      |    | 3 (6.5)      |        |
| Very                                                                                                             |     | 2 (0.6)       |     | 1 (0.6)       |     | 0 (0.0)      |    | 1 (2.2)      |        |

|                                                                                                                    |     |            |     |           |     |           |    |           |        |
|--------------------------------------------------------------------------------------------------------------------|-----|------------|-----|-----------|-----|-----------|----|-----------|--------|
| How stressful is the testing for your family overall?                                                              | 321 |            | 172 |           | 103 |           | 46 |           | 0.2995 |
| Not at all                                                                                                         |     | 123 (38.3) |     | 63 (36.6) |     | 47 (45.6) |    | 13 (28.3) |        |
| Somewhat                                                                                                           |     | 132 (41.1) |     | 76 (44.2) |     | 36 (35)   |    | 20 (43.5) |        |
| Moderately                                                                                                         |     | 55 (17.1)  |     | 28 (16.3) |     | 18 (17.5) |    | 9 (19.6)  |        |
| Fairly                                                                                                             |     | 9 (2.8)    |     | 4 (2.3)   |     | 2 (1.9)   |    | 3 (6.5)   |        |
| Very                                                                                                               |     | 2 (0.6)    |     | 1 (0.6)   |     | 0 (0.0)   |    | 1 (2.2)   |        |
| How much does the testing affect the organization of your daily routine?                                           | 321 |            | 171 |           | 104 |           | 46 |           | 0.037  |
| Not at all                                                                                                         |     | 117 (36.4) |     | 50 (29.2) |     | 52 (50)   |    | 15 (32.6) |        |
| Somewhat                                                                                                           |     | 150 (46.7) |     | 87 (50.9) |     | 41 (39.4) |    | 22 (47.8) |        |
| Moderately                                                                                                         |     | 36 (11.2)  |     | 25 (14.6) |     | 5 (4.8)   |    | 6 (13.0)  |        |
| Fairly                                                                                                             |     | 15 (4.7)   |     | 7 (4.1)   |     | 5 (4.8)   |    | 3 (6.5)   |        |
| Very                                                                                                               |     | 3 (0.9)    |     | 2 (1.2)   |     | 1 (1.0)   |    | 0 (0.0)   |        |
| To what extent do you fear negative consequences for yourself and your family as a result of the measures/testing? | 322 |            | 173 |           | 103 |           | 46 |           | 0.3354 |
| Not at all                                                                                                         |     | 110 (34.2) |     | 64 (37.0) |     | 37 (35.9) |    | 9 (19.6)  |        |
| Somewhat                                                                                                           |     | 102 (31.7) |     | 50 (28.9) |     | 33 (32.0) |    | 19 (41.3) |        |
| Moderately                                                                                                         |     | 72 (22.4)  |     | 38 (22.0) |     | 24 (23.3) |    | 10 (21.7) |        |
| Fairly                                                                                                             |     | 29 (9)     |     | 16 (9.2)  |     | 8 (7.8)   |    | 5 (10.9)  |        |
| Very                                                                                                               |     | 9 (2.8)    |     | 5 (2.9)   |     | 1 (1.0)   |    | 3 (6.5)   |        |
| What are your views on the planned measures for testing for coronavirus infections?                                | 316 |            | 169 |           | 102 |           | 45 |           | 0.0002 |
| Very critical                                                                                                      |     | 5 (1.6)    |     | 3 (1.8)   |     | 2 (2.0)   |    | 0 (0.0)   |        |
| Somewhat critical                                                                                                  |     | 15 (4.7)   |     | 6 (3.6)   |     | 7 (6.9)   |    | 2 (4.4)   |        |
| Neutral                                                                                                            |     | 50 (15.8)  |     | 11 (6.5)  |     | 26 (25.5) |    | 13 (28.9) |        |

|                                                                                                      |     |               |     |               |     |              |    |              |        |
|------------------------------------------------------------------------------------------------------|-----|---------------|-----|---------------|-----|--------------|----|--------------|--------|
| Fairly supportive                                                                                    |     | 127<br>(40.2) |     | 72<br>(42.6)  |     | 35<br>(34.3) |    | 20<br>(44.4) |        |
| Very supportive                                                                                      |     | 119<br>(37.7) |     | 77<br>(45.6)  |     | 32<br>(31.4) |    | 10<br>(22.2) |        |
| <b>Health burden on parents due to the pandemic (worries/fears)</b>                                  |     |               |     |               |     |              |    |              |        |
| Affected by worries about your health                                                                | 324 |               | 174 |               | 104 |              | 46 |              | 0.6795 |
| Not affected                                                                                         |     | 149<br>(46.0) |     | 84<br>(48.3)  |     | 45<br>(43.3) |    | 20<br>(43.5) |        |
| Slightly affected                                                                                    |     | 150<br>(46.3) |     | 76<br>(43.7)  |     | 53<br>(51.0) |    | 21<br>(45.7) |        |
| Strongly affected                                                                                    |     | 25<br>(7.7)   |     | 14<br>(8.0)   |     | 6<br>(5.8)   |    | 5<br>(10.9)  |        |
| Affected by worries about contracting coronavirus                                                    | 324 |               | 174 |               | 104 |              | 46 |              | 0.1105 |
| Not affected                                                                                         |     | 109<br>(33.6) |     | 67<br>(38.5)  |     | 26<br>(25.0) |    | 16<br>(34.8) |        |
| Slightly affected                                                                                    |     | 178<br>(54.9) |     | 90<br>(51.7)  |     | 66<br>(63.5) |    | 22<br>(47.8) |        |
| Strongly affected                                                                                    |     | 37<br>(11.4)  |     | 17<br>(9.8)   |     | 12<br>(11.5) |    | 8<br>(17.4)  |        |
| Affected by worries of becoming seriously ill if infected with coronavirus                           | 323 |               | 173 |               | 104 |              | 46 |              | 0.7043 |
| Not affected                                                                                         |     | 120<br>(37.2) |     | 67<br>(38.7)  |     | 38<br>(36.5) |    | 15<br>(32.6) |        |
| Slightly affected                                                                                    |     | 150<br>(46.4) |     | 77<br>(44.5)  |     | 52<br>(50.0) |    | 21<br>(45.7) |        |
| Strongly affected                                                                                    |     | 53<br>(16.4)  |     | 29<br>(16.8)  |     | 14<br>(13.5) |    | 10<br>(21.7) |        |
| Affected by concerns of insufficient capacities for timely treatment in the event of serious illness | 322 |               | 172 |               | 104 |              | 46 |              | 0.2062 |
| Not affected                                                                                         |     | 178<br>(55.3) |     | 100<br>(58.1) |     | 57<br>(54.8) |    | 21<br>(45.7) |        |
| Slightly affected                                                                                    |     | 106<br>(32.9) |     | 54<br>(31.4)  |     | 37<br>(35.6) |    | 15<br>(32.6) |        |
| Strongly affected                                                                                    |     | 38<br>(11.8)  |     | 18<br>(10.5)  |     | 10<br>(9.6)  |    | 10<br>(21.7) |        |
| Affected by worries about infecting others with coronavirus                                          | 323 |               | 173 |               | 104 |              | 46 |              | 0.2352 |
| Not affected                                                                                         |     | 79<br>(24.5)  |     | 49<br>(28.3)  |     | 22<br>(21.2) |    | 8<br>(17.4)  |        |
| Slightly affected                                                                                    |     | 166<br>(51.4) |     | 87<br>(50.3)  |     | 57<br>(54.8) |    | 22<br>(47.8) |        |

|                             |     |              |     |              |     |             |    |              |            |
|-----------------------------|-----|--------------|-----|--------------|-----|-------------|----|--------------|------------|
| Strongly affected           |     | 78<br>(24.1) |     | 37<br>(21.4) |     | 25<br>(24)  |    | 16<br>(34.8) |            |
| <i>PHQ-4</i> : above normal | 316 | 43<br>(13.6) | 170 | 23<br>(13.5) | 101 | 10<br>(9.9) | 45 | 10<br>(22.2) | 0.133<br>9 |



**eTable 2. Sociodemographic Characteristics of Participating Childcare Workers, Attitudes Toward the Pandemic/Experience of Self-testing/Perception of Health Burden of the Pandemic, Week 1**

N=total, SAL=saliva (mouthwash) samples, AgRT=rapid antigen self-test, PHQ-4=Patient Health Questionnaire 4.

| Childcare workers (CCWs)                          | All participants |                     | Group 1 (SAL + AgRT) |                     | Group 2 (SAL) |                     | Group 3 (AgRT) |                     | p-value |
|---------------------------------------------------|------------------|---------------------|----------------------|---------------------|---------------|---------------------|----------------|---------------------|---------|
|                                                   | N                | n (%) or Median IQR | N                    | n (%) or Median IQR | N             | n (%) or Median IQR | N              | n (%) or Median IQR |         |
| <b>Socio-demographic data, Health</b>             |                  |                     |                      |                     |               |                     |                |                     |         |
| Age, median (IQR)                                 | 139              | 30, 25-46           | 96                   | 30, 25-45           | 29            | 33, 24-52           | 14             | 30, 25-37           | 0.442   |
| Female, n(%)                                      | 109              | 102 (93.6)          | 78                   | 74 (94.9)           | 19            | 18 (94.7)           | 12             | 10 (83.3)           | 0.263   |
| Education                                         | 110              |                     | 79                   |                     | 20            |                     | 11             |                     | 0.327   |
| None                                              |                  |                     |                      |                     |               |                     |                |                     |         |
| Lower secondary level / basic                     |                  | 9 (8.2)             |                      | 7 (8.9)             |               |                     |                | 2 (18.2)            |         |
| Lower secondary / advanced                        |                  | 39 (35.5)           |                      | 25 (31.6)           |               | 11 (55.0)           |                | 3 (27.3)            |         |
| Upper secondary level (University entrance level) |                  | 60 (54.5)           |                      | 45 (57.0)           |               | 9 (45.0)            |                | 6 (54.5)            |         |
| Other                                             |                  | 2 (1.8)             |                      | 2 (2.5)             |               |                     |                |                     |         |
| Chronic health condition (any), n(%)              | 110              | 24 (21.8)           | 79                   | 17 (21.5)           | 20            | 4 (20.0)            | 11             | 3 (27.3)            | 0.866   |
| How many people live in your household?           | 109              |                     | 80                   |                     | 19            |                     | 10             |                     | 0.735   |
| 1                                                 |                  | 11 (10.1)           |                      | 8 (10.0)            |               | 3 (15.8)            |                |                     |         |
| 2                                                 |                  | 52 (47.7)           |                      | 36 (45.0)           |               | 11 (57.9)           |                | 5 (50.0)            |         |
| 3                                                 |                  | 25 (22.9)           |                      | 19 (23.8)           |               | 4 (21.1)            |                | 2 (20.0)            |         |
| 4                                                 |                  | 17 (15.6)           |                      | 13 (16.3)           |               | 1 (5.3)             |                | 3 (30.0)            |         |
| 5                                                 |                  | 4 (3.7)             |                      | 4 (5.0)             |               |                     |                |                     |         |
| Persons in household older than 18 years          | 105              |                     | 78                   |                     | 19            |                     | 8              |                     | 0.542   |
| 0                                                 |                  | 1 (1.0)             |                      | 1 (1.3)             |               |                     |                |                     |         |
| 1                                                 |                  | 16 (15.2)           |                      | 11 (14.1)           |               | 4 (21.1)            |                | 1 (12.5)            |         |
| 2                                                 |                  | 67 (63.8)           |                      | 49 (62.8)           |               | 13 (68.4)           |                | 5 (62.5)            |         |
| 3                                                 |                  | 14 (13.3)           |                      | 12 (15.4)           |               | 2 (10.5)            |                |                     |         |
| 4                                                 |                  | 5 (4.8)             |                      | 3 (3.8)             |               |                     |                | 2 (25.0)            |         |
| 5                                                 |                  | 2 (1.9)             |                      | 2 (2.6)             |               |                     |                |                     |         |
| Persons in household younger than 18 years        | 80               |                     | 59                   |                     | 15            |                     | 6              |                     | 0.287   |
| 0                                                 |                  | 44 (55.0)           |                      | 32 (54.2)           |               | 11 (73.3)           |                | 1 (16.7)            |         |

|                                                                                                                        |     |           |    |           |    |           |    |           |       |
|------------------------------------------------------------------------------------------------------------------------|-----|-----------|----|-----------|----|-----------|----|-----------|-------|
| 1                                                                                                                      |     | 26 (32.5) |    | 19 (32.2) |    | 3 (20.0)  |    | 4 (66.7)  |       |
| 2                                                                                                                      |     | 9 (11.3)  |    | 7 (11.9)  |    | 1 (6.7)   |    | 1 (16.7)  |       |
| 3                                                                                                                      |     | 1 (1.3)   |    | 1 (1.7)   |    |           |    |           |       |
| 4                                                                                                                      |     |           |    |           |    |           |    |           |       |
| 5                                                                                                                      |     |           |    |           |    |           |    |           |       |
| At least one household member with a long-term or chronic medical condition                                            | 109 | 20 (18.3) | 79 | 16 (20.3) | 20 | 3 (15.0)  | 10 | 1 (10.0)  | 0.775 |
| <b>Attitudes towards/experiences with SARS-CoV-2 or vaccination</b>                                                    |     |           |    |           |    |           |    |           |       |
| How dangerous do you think SARS-CoV-2 is for you/your family? n(%)                                                     | 111 |           | 80 |           | 20 |           | 11 |           | 0.310 |
| Not at all                                                                                                             |     | 3 (2.7)   |    | 3 (3.8)   |    | 0 (0.0)   |    |           |       |
| Somewhat                                                                                                               |     | 5 (4.5)   |    | 3 (3.8)   |    | 0 (0.0)   |    | 2 (18.2)  |       |
| Moderately                                                                                                             |     | 44 (39.6) |    | 30 (37.5) |    | 8 (40.0)  |    | 6 (54.5)  |       |
| Fairly                                                                                                                 |     | 51 (45.9) |    | 39 (48.8) |    | 9 (45.0)  |    | 3 (27.3)  |       |
| Very                                                                                                                   |     | 8 (7.2)   |    | 5 (6.3)   |    | 3 (15.0)  |    | 0 (0.0)   |       |
| How dangerous do you think SARS-CoV-2 is for society? n(%)                                                             | 111 |           | 80 |           | 20 |           | 11 |           | 0.076 |
| Not at all                                                                                                             |     | 0 (0.0)   |    | 0 (0.0)   |    | 0 (0.0)   | 11 | 0 (0.0)   |       |
| Somewhat                                                                                                               |     | 4 (3.6)   |    | 3 (3.8)   |    | 0 (0.0)   | 11 | 1 (9.1)   |       |
| Moderately                                                                                                             |     | 23 (20.7) |    | 16 (20.0) |    | 2 (10.0)  | 11 | 5 (45.5)  |       |
| Fairly                                                                                                                 |     | 62 (55.9) |    | 47 (58.8) |    | 13 (65.0) | 11 | 2 (18.2)  |       |
| Very                                                                                                                   |     | 22 (19.8) |    | 14 (17.5) |    | 5 (25.0)  | 11 | 3 (27.3)  |       |
| I personally know someone (family/friends/acquaintances) who tested positive for/was ill with/died of SARS-COV-2. n(%) | 111 | 90 (81.1) | 79 | 67 (84.8) | 20 | 16 (80.0) | 12 | 7 (58.3)  | 0.090 |
| How important do you think government-mandated restrictive measures to control SARS-CoV-2 are? n(%)                    | 111 |           | 80 |           | 20 |           | 11 |           | 0.319 |
| Not at all                                                                                                             |     | 1 (0.9)   |    | 1 (1.3)   |    | 0 (0.0)   |    | 0 (0.0)   |       |
| Somewhat                                                                                                               |     | 5 (4.5)   |    | 4 (5.0)   |    | 0 (0.0)   |    | 1 (9.1)   |       |
| Moderately                                                                                                             |     | 29 (16.1) |    | 18 (22.5) |    | 6 (30.0)  |    | 5 (4.5)   |       |
| Fairly                                                                                                                 |     | 31 (27.9) |    | 21 (26.3) |    | 6 (30.0)  |    | 19 (26.1) |       |
| Very                                                                                                                   |     | 45 (40.5) |    | 36 (45.0) |    | 8 (40.0)  |    | 31 (27.9) |       |

|                                                                                                                                                              |     |            |    |            |    |            |    |          |       |
|--------------------------------------------------------------------------------------------------------------------------------------------------------------|-----|------------|----|------------|----|------------|----|----------|-------|
| To what extent do you currently feel limited in your personal life by SARS-CoV-2?                                                                            | 111 |            | 80 |            | 20 |            | 11 |          | 0.212 |
| Not at all                                                                                                                                                   |     | 0 (0.0)    |    | 0 (0.0)    |    | 0 (0.0)    |    | 0 (0.0)  |       |
| Somewhat                                                                                                                                                     |     | 7 (6.3)    |    | 5 (6.3)    |    | 1 (5.0)    |    | 1 (9.1)  |       |
| Moderately                                                                                                                                                   |     | 33 (29.7)  |    | 27 (33.8)  |    | 6 (30.0)   |    | 0 (0.0)  |       |
| Fairly                                                                                                                                                       |     | 43 (38.7)  |    | 31 (38.8)  |    | 7 (35.0)   |    | 5 (45.5) |       |
| Very                                                                                                                                                         |     | 28 (25.2)  |    | 17 (21.3)  |    | 6 (30.0)   |    | 5 (45.5) |       |
| Supposing the coronavirus vaccine was approved for children, how important would you think it was that the children in your day care center were vaccinated? | 109 |            | 79 |            | 19 |            | 11 |          | 0.361 |
| Not at all                                                                                                                                                   |     | 10 (9.2)   |    | 8 (10.1)   |    | 0 (0.0)    |    | 2 (18.2) |       |
| Somewhat                                                                                                                                                     |     | 11 (10.1)  |    | 7 (8.9)    |    | 1 (5.3)    |    | 3 (27.3) |       |
| Moderately                                                                                                                                                   |     | 18 (16.5)  |    | 12 (15.2)  |    | 4 (21.1)   |    | 2 (18.2) |       |
| Fairly                                                                                                                                                       |     | 36 (33.0)  |    | 26 (32.9)  |    | 8 (42.1)   |    | 2 (18.2) |       |
| Very                                                                                                                                                         |     | 34 (31.2)  |    | 26 (32.9)  |    | 6 (31.6)   |    | 2 (18.2) |       |
| How important do you consider vaccinations in general?                                                                                                       | 110 |            | 79 |            | 20 |            | 11 |          | 0.054 |
| Not at all                                                                                                                                                   |     | 1 (0.9)    |    | 0 (0.0)    |    | 0 (0.0)    |    | 1 (9.1)  |       |
| Somewhat                                                                                                                                                     |     | 4 (3.6)    |    | 3 (3.8)    |    | 0 (0.0)    |    | 1 (9.1)  |       |
| Moderately                                                                                                                                                   |     | 13 (11.8)  |    | 9 (11.4)   |    | 1 (5.0)    |    | 3 (27.3) |       |
| Fairly                                                                                                                                                       |     | 34 (30.9)  |    | 27 (34.2)  |    | 4 (20.0)   |    | 3 (27.3) |       |
| Very                                                                                                                                                         |     | 58 (52.7)  |    | 40 (50.6)  |    | 15 (75.0)  |    | 3 (27.3) |       |
| <b>Experience of self-testing</b>                                                                                                                            |     |            |    |            |    |            |    |          |       |
| Do you perform self-testing with mouthwash (saliva samples) as part of this study? -yes                                                                      | 99  | 99 (100.0) | 79 | 79 (100.0) | 20 | 20 (100.0) |    |          |       |
| How time-consuming is it for you to perform self-sampling of saliva?                                                                                         | 99  |            | 79 |            | 20 |            |    |          | 0.340 |
| Not at all                                                                                                                                                   |     | 88 (88.9)  |    | 68 (86.1)  |    | 20 (100.0) |    |          |       |
| Somewhat                                                                                                                                                     |     | 8 (8.1)    |    | 8 (10.1)   |    | 0 (0.0)    |    |          |       |
| Moderately                                                                                                                                                   |     | 3 (3.0)    |    | 3 (3.8)    |    | 0 (0.0)    |    |          |       |
| Fairly                                                                                                                                                       |     | 0 (0.0)    |    | 0 (0.0)    |    | 0 (0.0)    |    |          |       |
| Very                                                                                                                                                         |     | 0 (0.0)    |    | 0 (0.0)    |    | 0 (0.0)    |    |          |       |

|                                                                                                                          |     |           |    |            |    |            |    |            |       |
|--------------------------------------------------------------------------------------------------------------------------|-----|-----------|----|------------|----|------------|----|------------|-------|
| How difficult is it to collect the saliva sample without assistance?                                                     | 99  |           | 79 |            | 20 |            |    |            | >0.99 |
| Not at all                                                                                                               |     | 97 (98.0) |    | 77 (97.5)  |    | 20 (100.0) |    |            |       |
| Somewhat                                                                                                                 |     | 0 (0.0)   |    | 0 (0.0)    |    | 0 (0.0)    |    |            |       |
| Moderately                                                                                                               |     | 2 (2.0)   |    | 2 (2.5)    |    | 0 (0.0)    |    |            |       |
| Fairly                                                                                                                   |     | 0 (0.0)   |    | 0 (0.0)    |    | 0 (0.0)    |    |            |       |
| Very                                                                                                                     |     | 0 (0.0)   |    | 0 (0.0)    |    | 0 (0.0)    |    |            |       |
| As part of this study, do you test yourself with rapid antigen tests at home using a nasal swab? - yes                   | 92  | 92 (100)  | 80 | 80 (100.0) |    |            | 12 | 12 (100.0) |       |
| How time-consuming is it to perform the AG Rapid test on yourself?                                                       | 92  |           | 80 |            |    |            | 12 |            | 0.846 |
| Not at all                                                                                                               |     | 36 (39.1) |    | 30 (37.5)  |    |            |    | 6 (50.0)   |       |
| Somewhat                                                                                                                 |     | 40 (43.5) |    | 35 (43.8)  |    |            |    | 5 (41.7)   |       |
| Moderately                                                                                                               |     | 13 (14.1) |    | 12 (15.0)  |    |            |    | 1 (8.3)    |       |
| Fairly                                                                                                                   |     | 2 (2.2)   |    | 2 (2.5)    |    |            |    | 0 (0.0)    |       |
| Very                                                                                                                     |     | 1 (1.1)   |    | 1 (1.3)    |    |            |    | 0 (0.0)    |       |
| How difficult is it to perform the AG Rapid Test without assistance?                                                     | 91  |           | 79 |            |    |            | 12 |            | 0.040 |
| Not at all                                                                                                               |     | 77 (84.6) |    | 69 (87.3)  |    |            |    | 8 (66.7)   |       |
| Somewhat                                                                                                                 |     | 11 (12.1) |    | 9 (11.4)   |    |            |    | 2 (16.7)   |       |
| Moderately                                                                                                               |     | 3 (3.3)   |    | 1 (1.3)    |    |            |    | 2 (16.7)   |       |
| Fairly                                                                                                                   |     |           |    | 0 (0.0)    |    |            |    | 0 (0.0)    |       |
| Very                                                                                                                     |     |           |    | 0 (0.0)    |    |            |    | 0 (0.0)    |       |
| <b>Assessment/Evaluation of the test measures</b>                                                                        |     |           |    |            |    |            |    |            |       |
| How useful do you think it is for yourself and other daycare workers to perform self-testing for coronavirus infections? | 112 |           | 80 |            | 20 |            | 12 |            | 0.435 |
| Not at all                                                                                                               | 112 | 1 (0.9)   | 80 | 1 (1.3)    | 20 | 0 (0.0)    | 12 | 0 (0.0)    |       |
| Somewhat                                                                                                                 | 112 | 3 (2.7)   | 80 | 2 (2.5)    | 20 | 0 (0.0)    | 12 | 1 (8.3)    |       |
| Moderately                                                                                                               | 112 | 5 (4.5)   | 80 | 4 (5.0)    | 20 | 1 (5.0)    | 12 | 0 (0.0)    |       |
| Fairly                                                                                                                   | 112 | 30 (26.8) | 80 | 20 (25.0)  | 20 | 4 (20.0)   | 12 | 6 (50.0)   |       |
| Very                                                                                                                     | 112 | 73 (65.2) | 80 | 53 (66.3)  | 20 | 15 (75.0)  | 12 | 5 (41.7)   |       |
| How useful do you think it is to test daycare children for                                                               | 111 |           | 80 |            | 20 |            | 11 |            | 0.251 |

|                                                                                                                 |     |            |           |  |           |  |            |       |
|-----------------------------------------------------------------------------------------------------------------|-----|------------|-----------|--|-----------|--|------------|-------|
| infections with the coronavirus?                                                                                |     |            |           |  |           |  |            |       |
| Not at all                                                                                                      |     |            | 0 (0.0)   |  | 0 (0.0)   |  | 0 (0.0)    |       |
| Somewhat                                                                                                        |     | 4 (3.6)    | 3 (3.8)   |  | 0 (0.0)   |  | 1 (9.1)    |       |
| Moderately                                                                                                      |     | 17 (15.3)  | 14 (17.5) |  | 1 (5.0)   |  | 2 (18.2)   |       |
| Fairly                                                                                                          |     | 40 (36.0)  | 26 (32.5) |  | 8 (40.0)  |  | 6 (54.5)   |       |
| Very                                                                                                            |     | 50 (45.0)  | 37 (46.3) |  | 11 (55.0) |  | 2 (18.2)   |       |
| How would you rate the frequency of testing, 2 days per week?                                                   | 112 |            | 80        |  | 20        |  | 12         | 0.946 |
| Not often enough                                                                                                |     | 8 (7.1)    | 7 (8.8)   |  | 1 (5.0)   |  | 0 (0.0)    |       |
| Appropriate                                                                                                     |     | 101 (90.2) | 70 (87.5) |  | 19 (95.0) |  | 12 (100.0) |       |
| Too often                                                                                                       |     | 3 (2.7)    | 3 (3.8)   |  | 0 (0.0)   |  | 0 (0.0)    |       |
| How does testing affect your sense of safety - that you are protecting yourself and your family from infection? | 112 |            | 80        |  | 20        |  | 12         | 0.718 |
| Not at all                                                                                                      |     | 2 (1.8)    | 2 (2.5)   |  | 0 (0.0)   |  | 0 (0.0)    |       |
| Somewhat                                                                                                        |     | 7 (6.3)    | 6 (7.5)   |  | 0 (0.0)   |  | 1 (8.3)    |       |
| Moderately                                                                                                      |     | 21 (18.8)  | 12 (15.0) |  | 6 (30.0)  |  | 3 (25.0)   |       |
| Fairly                                                                                                          |     | 60 (53.6)  | 43 (53.8) |  | 10 (50.0) |  | 7 (58.3)   |       |
| Very                                                                                                            |     | 22 (19.6)  | 17 (21.3) |  | 4 (20.0)  |  | 1 (8.3)    |       |
| How stressful is the testing experience for yourself?                                                           | 112 |            | 80        |  | 20        |  | 12         | 0.598 |
| Not at all                                                                                                      |     | 80 (71.4)  | 57 (71.3) |  | 16 (80.0) |  | 7 (58.3)   |       |
| Somewhat                                                                                                        |     | 23 (20.5)  | 16 (20.0) |  | 4 (20.0)  |  | 3 (25.0)   |       |
| Moderately                                                                                                      |     | 7 (6.3)    | 5 (6.3)   |  | 0 (0.0)   |  | 2 (16.7)   |       |
| Fairly                                                                                                          |     | 2 (1.8)    | 2 (2.5)   |  | 0 (0.0)   |  | 0 (0.0)    |       |
| Very                                                                                                            |     | 0 (0.0)    | 0 (0.0)   |  | 0 (0.0)   |  | 0 (0.0)    |       |
| How stressful is the testing for your family overall?                                                           | 110 |            | 78        |  | 20        |  | 12         | 0.106 |
| Not at all                                                                                                      |     | 84 (76.4)  | 60 (76.9) |  | 17 (85.0) |  | 7 (58.3)   |       |
| Somewhat                                                                                                        |     | 20 (18.2)  | 15 (19.2) |  | 3 (15.0)  |  | 2 (16.7)   |       |
| Moderately                                                                                                      |     | 5 (4.5)    | 2 (2.6)   |  | 0 (0.0)   |  | 3 (25.0)   |       |
| Fairly                                                                                                          |     | 1 (0.9)    | 1 (1.3)   |  | 0 (0.0)   |  | 0 (0.0)    |       |
| Very                                                                                                            |     | 0 (0.0)    | 0 (0.0)   |  | 0 (0.0)   |  | 0 (0.0)    |       |
| How much does the testing affect the organization of your daily routine?                                        | 112 |            | 80        |  | 20        |  | 12         | 0.026 |
| Not at all                                                                                                      |     | 58 (51.8)  | 39 (48.8) |  | 15 (75.0) |  | 4 (33.3)   |       |
| Somewhat                                                                                                        |     | 45 (40.2)  | 36 (45.0) |  | 5 (25.0)  |  | 4 (33.3)   |       |

|                                                                                                                    |     |           |    |           |    |          |    |          |       |
|--------------------------------------------------------------------------------------------------------------------|-----|-----------|----|-----------|----|----------|----|----------|-------|
| Moderately                                                                                                         |     | 6 (5.4)   |    | 3 (3.8)   |    | 0 (0.0)  |    | 3 (25.0) |       |
| Fairly                                                                                                             |     | 3 (2.7)   |    | 2 (2.5)   |    | 0 (0.0)  |    | 1 (8.3)  |       |
| Very                                                                                                               |     | 0 (0.0)   |    | 0 (0.0)   |    | 0 (0.0)  |    | 0 (0.0)  |       |
| To what extent do you fear negative consequences for yourself and your family as a result of the measures/testing? | 110 |           | 78 |           | 20 |          | 12 |          | 0.103 |
| Not at all                                                                                                         |     | 52 (47.3) |    | 40 (51.3) |    | 9 (45.0) |    | 3 (25.0) |       |
| Somewhat                                                                                                           |     | 26 (23.6) |    | 19 (24.4) |    | 6 (30.0) |    | 1 (8.3)  |       |
| Moderately                                                                                                         |     | 21 (19.1) |    | 13 (16.7) |    | 3 (15.0) |    | 5 (41.7) |       |
| Fairly                                                                                                             |     | 4 (3.6)   |    | 2 (2.6)   |    | 0 (0.0)  |    | 2 (16.7) |       |
| Very                                                                                                               |     | 7 (6.4)   |    | 4 (5.1)   |    | 2 (10.0) |    | 1 (8.3)  |       |
| What are your views on the planned measures for testing for Coronavirus at baseline?                               | 105 |           | 76 |           | 19 |          | 10 |          | 0.746 |
| Very critical                                                                                                      |     | 0 (0.0)   |    | 0 (0.0)   |    | 0 (0.0)  |    | 0 (0.0)  |       |
| Somewhat critical                                                                                                  |     | 6 (5.7)   |    | 5 (6.6)   |    | 0 (0.0)  |    | 1 (10.0) |       |
| Neutral                                                                                                            |     | 14 (13.3) |    | 9 (11.8)  |    | 3 (15.8) |    | 2 (20.0) |       |
| Fairly supportive                                                                                                  |     | 38 (36.2) |    | 26 (34.2) |    | 8 (42.1) |    | 4 (40.0) |       |
| Very supportive                                                                                                    |     | 47 (44.8) |    | 36 (47.4) |    | 8 (42.1) |    | 3 (30.0) |       |
| <b>Health burden on caregivers due to the pandemic (worries/fears)</b>                                             |     |           |    |           |    |          |    |          |       |
| Affected by worries about your health                                                                              | 110 |           | 80 |           | 20 |          | 10 |          | 0.560 |
| Not affected                                                                                                       |     | 40 (36.4) |    | 29 (36.3) |    | 8 (40.0) |    | 3 (30.0) |       |
| Slightly affected                                                                                                  |     | 53 (48.2) |    | 38 (47.5) |    | 8 (40.0) |    | 7 (70.0) |       |
| Strongly affected                                                                                                  |     | 17 (15.5) |    | 13 (16.3) |    | 4 (20.0) |    | 0 (0.0)  |       |
| Affected by worries about contracting coronavirus                                                                  | 110 |           | 80 |           | 20 |          | 10 |          | 0.707 |
| Not affected                                                                                                       |     | 20 (18.2) |    | 13 (16.3) |    | 5 (25.0) |    | 2 (20.0) |       |
| Slightly affected                                                                                                  |     | 64 (58.2) |    | 49 (61.3) |    | 9 (45.0) |    | 6 (60.0) |       |
| Strongly affected                                                                                                  |     | 26 (23.6) |    | 18 (22.5) |    | 6 (30.0) |    | 2 (20.0) |       |
| Affected by worries of becoming seriously ill if infected with coronavirus                                         | 109 |           | 79 |           | 20 |          | 10 |          | 0.290 |
| Not affected                                                                                                       |     | 28 (25.7) |    | 17 (21.5) |    | 7 (35.0) |    | 4 (40.0) |       |
| Slightly affected                                                                                                  |     | 48 (44.0) |    | 37 (46.8) |    | 6 (30.0) |    | 5 (50.0) |       |
| Strongly affected                                                                                                  |     | 33 (30.3) |    | 25 (31.6) |    | 7 (35.0) |    | 1 (10.0) |       |
| Affected by concerns of insufficient capacities for timely                                                         | 110 |           | 80 |           | 20 |          | 10 |          | 0.191 |

|                                                             |     |           |    |           |    |           |    |          |       |
|-------------------------------------------------------------|-----|-----------|----|-----------|----|-----------|----|----------|-------|
| treatment in the event of serious illness                   |     |           |    |           |    |           |    |          |       |
| Not affected                                                |     | 41 (37.3) |    | 29 (36.2) |    | 5 (25.0)  |    | 7 (70.0) |       |
| Slightly affected                                           |     | 39 (35.5) |    | 30 (37.5) |    | 8 (40.0)  |    | 1 (10.0) |       |
| Strongly affected                                           |     | 30 (27.3) |    | 21 (26.3) |    | 7 (35.0)  |    | 2 (20.0) |       |
| Affected by worries about infecting others with coronavirus | 110 |           | 80 |           | 20 |           | 10 |          | 0.992 |
| Not affected                                                |     | 10 (9.1)  |    | 7 (8.8)   |    | 2 (10.0)  |    | 1 (10.0) |       |
| Slightly affected                                           |     | 37 (33.6) |    | 28 (35.0) |    | 6 (30.0)  |    | 3 (30.0) |       |
| Strongly affected                                           |     | 63 (57.3) |    | 45 (56.3) |    | 12 (60.0) |    | 6 (60.0) |       |
| PHQ-4 above normal                                          | 104 | 20 (19.2) | 76 | 11 (14.5) | 18 | 4 (22.2)  | 10 | 5 (50.0) | 0.030 |

**eTable 3. Comparison of Children's Health Status/Readiness to Participate and Parents' Perceptions of Respiratory Surveillance Measures/Attitudes Toward the Pandemic at Weeks 1 and 12**

N=total, SAL=saliva (mouth rinsing fluid) samples, AgRT= antigen rapid self-test, CBCL=Child Behavior Checklist, PHQ-4=Patient Health Questionnaire 4.

|                                                                                           | All Participants |            |            |         | Group 1<br>(SAL + AgRT) |           |           |         | Group 2<br>(SAL) |           |           |         | Group 3<br>(AgRT) |           |           |         |
|-------------------------------------------------------------------------------------------|------------------|------------|------------|---------|-------------------------|-----------|-----------|---------|------------------|-----------|-----------|---------|-------------------|-----------|-----------|---------|
|                                                                                           | N                | Week 1     | Week 12    | p-value | N                       | Week 1    | Week 12   | p-value | N                | Week 1    | Week 12   | p-value | N                 | Week 1    | Week 12   | p-value |
| <b>Children</b>                                                                           |                  |            |            |         |                         |           |           |         |                  |           |           |         |                   |           |           |         |
| CBCL indicative of problematic behavior- yes                                              | 245              | 20 (8.2)   | 15 (6.1)   | 0.359   | 143                     | 12 (8.4)  | 8 (5.6)   | 0.344   | 68               | 4 (5.9)   | 5 (7.4)   | >0.999  | 34                | 4 (11.8)  | 2 (5.9)   | 0.625   |
| How well did your child participate from your point of view? (Saliva sample)              | 112              |            |            | 0.745   | 77                      |           |           | >0.999  | 35               |           |           | >0.999  |                   |           |           |         |
| Poorly                                                                                    |                  | 12 (10.7)  | 10 (8.9)   |         |                         | 6 (7.8)   | 5 (6.5)   |         | 35               | 6 (17.1)  | 5 (14.3)  |         |                   |           |           |         |
| Well                                                                                      |                  | 100 (89.3) | 102 (91.1) |         |                         | 71 (92.2) | 72 (93.5) |         | 35               | 29 (82.9) | 30 (85.7) |         |                   |           |           |         |
| To what extent did your child like participating from your point of view? (Saliva sample) | 141              |            |            | 0.169   | 99                      |           |           | 0.481   | 42               |           |           | 0.289   |                   |           |           |         |
| Did not like it                                                                           |                  | 17 (12.1)  | 25 (17.7)  |         |                         | 11 (11.1) | 15 (15.2) |         |                  | 6 (14.3)  | 10 (23.8) |         |                   |           |           |         |
| Liked it                                                                                  |                  | 124 (87.9) | 116 (82.3) |         |                         | 88 (88.9) | 84 (84.8) |         |                  | 36 (85.7) | 32 (76.2) |         |                   |           |           |         |
| How well did your child participate from your point of view? (Rapid test)                 | 93               |            |            | 0.701   | 69                      |           |           | 0.664   |                  |           |           |         | 24                |           |           | >0.999  |
| Poorly                                                                                    |                  | 47 (50.5)  | 50 (53.8)  |         |                         | 31 (44.9) | 34 (49.3) |         |                  |           |           |         |                   | 16 (66.7) | 16 (66.7) |         |
| Well                                                                                      |                  | 46 (49.5)  | 43 (46.2)  |         |                         | 38 (55.1) | 35 (50.7) |         |                  |           |           |         |                   | 8 (33.3)  | 8 (33.3)  |         |
| To what extent did your child like participating from your point of view? (Rapid test)    | 125              |            |            | 0.073   | 95                      |           |           | 0.136   |                  |           |           |         | 30                |           |           | 0.508   |



|                                                                                                                    | All Participants |            |            |         | Group 1<br>(SAL + AgRT) |            |            |         | Group 2<br>(SAL) |           |           |         | Group 3<br>(AgRT) |           |           |         |
|--------------------------------------------------------------------------------------------------------------------|------------------|------------|------------|---------|-------------------------|------------|------------|---------|------------------|-----------|-----------|---------|-------------------|-----------|-----------|---------|
|                                                                                                                    | N                | Week 1     | Week 12    | p-value | N                       | Week 1     | Week 12    | p-value | N                | Week 1    | Week 12   | p-value | N                 | Week 1    | Week 12   | p-value |
| Did not like it                                                                                                    |                  | 80 (64.0)  | 92 (73.6)  |         |                         | 59 (62.1)  | 68 (71.6)  |         |                  |           |           |         |                   | 21 (70)   | 24 (80)   |         |
| Liked it                                                                                                           |                  | 45 (36.0)  | 33 (26.4)  |         |                         | 36 (37.9)  | 27 (28.4)  |         |                  |           |           |         |                   | 9 (30)    | 6 (20)    |         |
| <b>Parents</b>                                                                                                     |                  |            |            |         |                         |            |            |         |                  |           |           |         |                   |           |           |         |
| How dangerous do you think the coronavirus is for you and your family?                                             | 223              |            |            | 0.013   | 136                     |            |            | 0.043   | 59               |           |           | 0.388   | 28                |           |           | 0.687   |
| Not dangerous (1-3)                                                                                                |                  | 140 (62.8) | 158 (70.9) |         |                         | 82 (60.3)  | 94 (69.1)  |         |                  | 40 (67.8) | 44 (74.6) |         |                   | 18 (64.3) | 20 (71.4) |         |
| Dangerous (4-5)                                                                                                    |                  | 83 (37.2)  | 65 (29.1)  |         |                         | 54 (39.7)  | 42 (30.9)  |         |                  | 19 (32.2) | 15 (25.4) |         |                   | 10 (35.7) | 8 (28.6)  |         |
| How dangerous do you think the coronavirus is for society?                                                         | 223              |            |            | <0.001  | 136                     |            |            | 0.019   | 59               |           |           | 0.006   | 28                |           |           | 0.727   |
| Not dangerous (1-3)                                                                                                |                  | 48 (21.5)  | 73 (32.7)  |         |                         | 25 (18.4)  | 38 (27.9)  |         |                  | 13 (22)   | 23 (39)   |         |                   | 10 (35.7) | 12 (42.9) |         |
| Dangerous (4-5)                                                                                                    |                  | 175 (78.5) | 150 (67.3) |         |                         | 111 (81.6) | 98 (72.1)  |         |                  | 46 (78)   | 36 (61)   |         |                   | 18 (64.3) | 16 (57.1) |         |
| I personally know someone (family/ friends/acquaintances) who tested positive for/was ill with /died of SARS-COV-2 | 223              | 192 (86.1) | 178 (79.8) | 0.009   | 136                     | 116 (85.3) | 114 (83.8) | 0.774   | 59               | 52 (88.1) | 44 (74.6) | 0.008   | 28                | 24 (85.7) | 20 (71.4) | 0.219   |
| How important do you think government-mandated restrictive measures to control SARS-CoV-2 are?                     | 223              |            |            | 0.508   | 136                     |            |            | 0.625   | 59               |           |           | >0.999  | 28                |           |           | >0.999  |
| Not important (1-2)                                                                                                |                  | 9 (4)      | 6 (2.7)    |         |                         | 4 (2.9)    | 2 (1.5)    |         |                  | 3 (5.1)   | 3 (5.1)   |         |                   | 2 (7.1)   | 1 (3.6)   |         |
| Important (3-5)                                                                                                    |                  | 214 (96)   | 217 (97.3) |         |                         | 132 (97.1) | 134 (98.5) |         |                  | 56 (94.9) | 56 (94.9) |         |                   | 26 (92.9) | 27 (96.4) |         |
| To what extent do you currently feel limited in your personal life by the coronavirus?                             | 223              |            |            | <0.001  | 136                     |            |            | <0.001  | 59               |           |           | <0.001  | 28                |           |           | 0.002   |
| Not limited (1-3)                                                                                                  |                  | 98 (43.9)  | 184 (82.5) |         |                         | 60 (44.1)  | 116 (85.3) |         |                  | 26 (44.1) | 46 (78)   |         |                   | 12 (42.9) | 22 (78.6) |         |
| Limited (4-5)                                                                                                      |                  | 125 (56.1) | 39 (17.5)  |         |                         | 76 (55.9)  | 20 (14.7)  |         |                  | 33 (55.9) | 13 (22)   |         |                   | 16 (57.1) | 6 (21.4)  |         |

|                                                                    | All Participants |            |            |         | Group 1<br>(SAL + AgRT) |            |            |         | Group 2<br>(SAL) |           |           |         | Group 3<br>(AgRT) |           |           |         |
|--------------------------------------------------------------------|------------------|------------|------------|---------|-------------------------|------------|------------|---------|------------------|-----------|-----------|---------|-------------------|-----------|-----------|---------|
|                                                                    | N                | Week 1     | Week 12    | p-value | N                       | Week 1     | Week 12    | p-value | N                | Week 1    | Week 12   | p-value | N                 | Week 1    | Week 12   | p-value |
| Not important (1-2)                                                |                  | 3 (1.3)    | 2 (0.9)    |         |                         | 2 (1.5)    |            |         |                  | 1 (1.7)   | 1 (1.7)   |         |                   | 0 (0.0)   | 1 (3.6)   |         |
| Important (3-5)                                                    |                  | 220 (98.7) | 221 (99.1) |         |                         | 134 (98.5) | 136 (100)  |         |                  | 58 (98.3) | 58 (98.3) |         |                   | 28 (100)  | 27 (96.4) |         |
| Are you willing to be vaccinated against coronavirus?              | 224              |            |            | <0.001  | 136                     |            |            | <0.001  | 60               |           |           | <0.001  | 28                |           |           | n.a.    |
| No                                                                 |                  | 6 (2.7)    | 6 (2.7)    |         |                         | 4 (2.9)    | 2 (1.5)    |         |                  | 1 (1.7)   | 4 (6.7)   |         |                   | 1 (3.6)   | 0 (0.0)   |         |
| Yes                                                                |                  | 120 (53.6) | 48 (21.4)  |         |                         | 73 (53.7)  | 28 (20.6)  |         |                  | 34 (56.7) | 15 (25)   |         |                   | 13 (46.4) | 5 (17.9)  |         |
| I have already been vaccinated                                     |                  | 82 (36.6)  | 161 (71.9) |         |                         | 53 (39)    | 103 (75.7) |         |                  | 16 (26.7) | 37 (61.7) |         |                   | 13 (46.4) | 21 (75)   |         |
| I have previously had a laboratory-confirmed coronavirus infection |                  | 3 (1.3)    | 1 (0.4)    |         |                         | 3 (2.2)    | 1 (0.7)    |         |                  |           |           |         |                   | 0 (0.0)   | 0 (0.0)   |         |
| I do not know                                                      |                  | 13 (5.8)   | 8 (3.6)    |         |                         | 3 (2.2)    | 2 (1.5)    |         |                  | 9 (15)    | 4 (6.7)   |         |                   | 1 (3.6)   | 2 (7.1)   |         |
| How useful do you think the tests are?                             | 221              |            |            | >0.999  | 135                     |            |            | 0.289   | 59               |           |           | 0.375   | 27                |           |           | >0.999  |
| Not useful (1-3)                                                   |                  | 29 (13.1)  | 30 (13.6)  |         |                         | 11 (8.1)   | 13 (9.6)   |         |                  | 12 (20.3) | 8 (13.6)  |         |                   | 6 (22.2)  | 9 (33.3)  |         |
| Useful (4-5)                                                       |                  | 192 (86.9) | 191 (86.4) |         |                         | 124 (91.9) | 122 (90.4) |         |                  | 47 (79.7) | 51 (86.4) |         |                   | 21 (77.8) | 18 (66.7) |         |
| How would you rate the frequency of testing, 2 days per week?      | 223              |            |            | 0.352   | 135                     |            |            | 0.905   | 60               |           |           | n.a.    | 28                |           |           | n.a.    |
| Not often enough                                                   |                  | 10 (4.5)   | 6 (2.7)    |         |                         | 6 (4.4)    | 6 (4.4)    |         |                  | 2 (3.3)   |           |         |                   | 2 (7.1)   | 0 (0.0)   |         |
| Appropriate                                                        |                  | 200 (89.7) | 203 (91)   |         |                         | 121 (89.6) | 122 (90.4) |         |                  | 55 (91.7) | 56 (93.3) |         |                   | 24 (85.7) | 25 (89.3) |         |
| Too often                                                          |                  | 13 (5.8)   | 14 (6.3)   |         |                         | 8 (5.9)    | 7 (5.2)    |         |                  | 3 (5)     | 4 (6.7)   |         |                   | 2 (7.1)   | 3 (10.7)  |         |
| How satisfied are you with doing the testing yourself?             | 222              |            |            | 0.382   | 134                     |            |            | 0.845   | 60               |           |           | 0.146   | 28                |           |           | 0.508   |
| Not satisfied (1-3)                                                |                  | 42 (18.9)  | 49 (22.1)  |         |                         | 24 (17.9)  | 22 (16.4)  |         |                  | 8 (13.3)  | 14 (23.3) |         |                   | 10 (35.7) | 13 (46.4) |         |

|                                                                                                                    | All Participants |            |            |         | Group 1<br>(SAL + AgRT) |            |            |         | Group 2<br>(SAL) |           |           |         | Group 3<br>(AgRT) |           |           |         |
|--------------------------------------------------------------------------------------------------------------------|------------------|------------|------------|---------|-------------------------|------------|------------|---------|------------------|-----------|-----------|---------|-------------------|-----------|-----------|---------|
|                                                                                                                    | N                | Week 1     | Week 12    | p-value | N                       | Week 1     | Week 12    | p-value | N                | Week 1    | Week 12   | p-value | N                 | Week 1    | Week 12   | p-value |
| Satisfied (4-5)                                                                                                    |                  | 180 (81.1) | 173 (77.9) |         |                         | 110 (82.1) | 112 (83.6) |         |                  | 52 (86.7) | 46 (76.7) |         |                   | 18 (64.3) | 15 (53.6) |         |
| How does testing affect your sense of security -- that you are protecting yourself and your family from infection? | 222              |            |            | 0.332   | 135                     |            |            | >0.999  | 59               |           |           | >0.999  | 28                |           |           | 0.109   |
| No effect (1-3)                                                                                                    |                  | 66 (29.7)  | 74 (33.3)  |         |                         | 40 (29.6)  | 41 (30.4)  |         |                  | 19 (32.2) | 20 (33.9) |         |                   | 7 (25)    | 13 (46.4) |         |
| It has an effect (4-5)                                                                                             |                  | 156 (70.3) | 148 (66.7) |         |                         | 95 (70.4)  | 94 (69.6)  |         |                  | 40 (67.8) | 39 (66.1) |         |                   | 21 (75)   | 15 (53.6) |         |
| How stressful is the testing experience for yourself?                                                              | 218              |            |            | >0.999  | 131                     |            |            | 0.687   | 59               |           |           | 0.375   | 28                |           |           | 0.625   |
| Not stressful (1-3)                                                                                                |                  | 209 (95.9) | 208 (95.4) |         |                         | 127 (96.9) | 125 (95.4) |         |                  | 55 (93.2) | 58 (98.3) |         |                   | 27 (96.4) | 25 (89.3) |         |
| Stressful (4-5)                                                                                                    |                  | 9 (4.1)    | 10 (4.6)   |         |                         | 4 (3.1)    | 6 (4.6)    |         |                  | 4 (6.8)   | 1 (1.7)   |         |                   | 1 (3.6)   | 3 (10.7)  |         |
| How stressful is the testing for your family overall?                                                              | 219              |            |            | 0.057   | 132                     |            |            | 0.180   | 59               |           |           | >0.999  | 28                |           |           | n.a.    |
| Not stressful (1-3)                                                                                                |                  | 216 (98.6) | 208 (95)   |         |                         | 130 (98.5) | 125 (94.7) |         |                  | 58 (98.3) | 58 (98.3) |         |                   | 28 (100)  | 25 (89.3) |         |
| Stressful (4-5)                                                                                                    |                  | 3 (1.4)    | 11 (5)     |         |                         | 2 (1.5)    | 7 (5.3)    |         |                  | 1 (1.7)   | 1 (1.7)   |         |                   | 0 (0.0)   | 3 (10.7)  |         |
| How much does the testing affect the organization of your daily routine?                                           | 220              |            |            | 0.774   | 132                     |            |            | 0.219   | 60               |           |           | 0.625   | 28                |           |           | >0.999  |
| No impairment (1-3)                                                                                                |                  | 210 (95.5) | 208 (94.5) |         |                         | 127 (96.2) | 123 (93.2) |         |                  | 56 (93.3) | 58 (96.7) |         |                   | 27 (96.4) | 27 (96.4) |         |
| Impairment (4-5)                                                                                                   |                  | 10 (4.5)   | 12 (5.5)   |         |                         | 5 (3.8)    | 9 (6.8)    |         |                  | 4 (6.7)   | 2 (3.3)   |         |                   | 1 (3.6)   | 1 (3.6)   |         |
| To what extent do you fear negative consequences for yourself and your family as a result of the measures/testing? | 218              |            |            | <0.001  | 132                     |            |            | 0.004   | 58               |           |           | 0.687   | 28                |           |           | 0.031   |
| No fear (1-3)                                                                                                      |                  | 191 (87.6) | 212 (97.2) |         |                         | 116 (87.9) | 129 (97.7) |         |                  | 54 (93.1) | 56 (96.6) |         |                   | 21 (75)   | 27 (96.4) |         |

|                                                                                                      | All Participants |            |            |         | Group 1<br>(SAL + AgRT) |            |            |         | Group 2<br>(SAL) |           |           |         | Group 3<br>(AgRT) |           |           |         |
|------------------------------------------------------------------------------------------------------|------------------|------------|------------|---------|-------------------------|------------|------------|---------|------------------|-----------|-----------|---------|-------------------|-----------|-----------|---------|
|                                                                                                      | N                | Week 1     | Week 12    | p-value | N                       | Week 1     | Week 12    | p-value | N                | Week 1    | Week 12   | p-value | N                 | Week 1    | Week 12   | p-value |
| Fear (4-5)                                                                                           |                  | 27 (12.4)  | 6 (2.8)    |         |                         | 16 (12.1)  | 3 (2.3)    |         |                  | 4 (6.9)   | 2 (3.4)   |         |                   | 7 (25)    | 1 (3.6)   |         |
| What are your views on the planned measures for testing for coronavirus infections                   | 217              |            |            | 0.344   | 131                     |            |            | >0.999  | 59               |           |           | 0.625   | 27                |           |           | n.a.    |
| Critical (1-2)                                                                                       |                  | 10 (4.6)   | 6 (2.8)    |         |                         | 5 (3.8)    | 4 (3.1)    |         |                  | 4 (6.8)   | 2 (3.4)   |         |                   | 1 (3.7)   | 0 (0.0)   |         |
| Supportive (3-5)                                                                                     |                  | 207 (95.4) | 211 (97.2) |         |                         | 126 (96.2) | 127 (96.9) |         |                  | 55 (93.2) | 57 (96.6) |         |                   | 26 (96.3) | 27 (100)  |         |
| Affected by worries about your health                                                                | 222              |            |            | 0.001   | 135                     |            |            | 0.006   | 59               |           |           | n.a.    | 28                |           |           | 0.572   |
| Not affected                                                                                         |                  | 92 (41.4)  | 114 (51.4) |         |                         | 57 (42.2)  | 75 (55.6)  |         |                  | 25 (42.4) | 28 (47.5) |         |                   | 10 (35.7) | 11 (39.3) |         |
| Slightly affected                                                                                    |                  | 111 (50)   | 103 (46.4) |         |                         | 67 (49.6)  | 56 (41.5)  |         |                  | 30 (50.8) | 31 (52.5) |         |                   | 14 (50)   | 16 (57.1) |         |
| Strongly affected                                                                                    |                  | 19 (8.6)   | 5 (2.3)    |         |                         | 11 (8.1)   | 4 (3)      |         |                  | 4 (6.8)   |           |         |                   | 4 (14.3)  | 1 (3.6)   |         |
| Affected by worries about contracting coronavirus                                                    | 222              |            |            | 0.005   | 135                     |            |            | 0.095   | 59               |           |           | 0.020   | 28                |           |           | 0.406   |
| Not affected                                                                                         |                  | 68 (30.6)  | 91 (41)    |         |                         | 47 (34.8)  | 58 (43)    |         |                  | 12 (20.3) | 24 (40.7) |         |                   | 9 (32.1)  | 9 (32.1)  |         |
| Slightly affected                                                                                    |                  | 125 (56.3) | 116 (52.3) |         |                         | 73 (54.1)  | 70 (51.9)  |         |                  | 41 (69.5) | 31 (52.5) |         |                   | 11 (39.3) | 15 (53.6) |         |
| Strongly affected                                                                                    |                  | 29 (13.1)  | 15 (6.8)   |         |                         | 15 (11.1)  | 7 (5.2)    |         |                  | 6 (10.2)  | 4 (6.8)   |         |                   | 8 (28.6)  | 4 (14.3)  |         |
| Affected by worries of becoming seriously ill if infected with coronavirus                           | 220              |            |            | <0.001  | 133                     |            |            | 0.004   | 59               |           |           | 0.066   | 28                |           |           | 0.162   |
| Not affected                                                                                         |                  | 77 (35)    | 102 (46.4) |         |                         | 48 (36.1)  | 61 (45.9)  |         |                  | 21 (35.6) | 30 (50.8) |         |                   | 8 (28.6)  | 11 (39.3) |         |
| Slightly affected                                                                                    |                  | 102 (46.4) | 99 (45)    |         |                         | 62 (46.6)  | 63 (47.4)  |         |                  | 28 (47.5) | 22 (37.3) |         |                   | 12 (42.9) | 14 (50)   |         |
| Strongly affected                                                                                    |                  | 41 (18.6)  | 19 (8.6)   |         |                         | 23 (17.3)  | 9 (6.8)    |         |                  | 10 (16.9) | 7 (11.9)  |         |                   | 8 (28.6)  | 3 (10.7)  |         |
| Affected by concerns of insufficient capacities for timely treatment in the event of serious illness | 221              |            |            | <0.001  | 134                     |            |            | <0.001  | 59               |           |           | 0.134   | 28                |           |           | 0.072   |

|                                                             | All Participants |            |            |         | Group 1<br>(SAL + AgRT) |           |            |         | Group 2<br>(SAL) |           |           |         | Group 3<br>(AgRT) |           |           |         |
|-------------------------------------------------------------|------------------|------------|------------|---------|-------------------------|-----------|------------|---------|------------------|-----------|-----------|---------|-------------------|-----------|-----------|---------|
|                                                             | N                | Week 1     | Week 12    | p-value | N                       | Week 1    | Week 12    | p-value | N                | Week 1    | Week 12   | p-value | N                 | Week 1    | Week 12   | p-value |
| Not affected                                                |                  | 117 (52.9) | 155 (70.1) |         |                         | 76 (56.7) | 104 (77.6) |         |                  | 30 (50.8) | 38 (64.4) |         |                   | 11 (39.3) | 13 (46.4) |         |
| Slightly affected                                           |                  | 73 (33)    | 58 (26.2)  |         |                         | 43 (32.1) | 27 (20.1)  |         |                  | 22 (37.3) | 18 (30.5) |         |                   | 8 (28.6)  | 13 (46.4) |         |
| Strongly affected                                           |                  | 31 (14)    | 8 (3.6)    |         |                         | 15 (11.2) | 3 (2.2)    |         |                  | 7 (11.9)  | 3 (5.1)   |         |                   | 9 (32.1)  | 2 (7.1)   |         |
| Affected by worries about infecting others with coronavirus | 221              |            |            | 0.001   | 134                     |           |            | 0.013   | 59               |           |           | 0.154   | 28                |           |           | 0.168   |
| Not affected                                                |                  | 53 (24)    | 70 (31.7)  |         |                         | 37 (27.6) | 46 (34.3)  |         |                  | 11 (18.6) | 19 (32.2) |         |                   | 5 (17.9)  | 5 (17.9)  |         |
| Slightly affected                                           |                  | 112 (50.7) | 120 (54.3) |         |                         | 67 (50)   | 73 (54.5)  |         |                  | 34 (57.6) | 31 (52.5) |         |                   | 11 (39.3) | 16 (57.1) |         |
| Strongly affected                                           |                  | 56 (25.3)  | 31 (14.0)  |         |                         | 30 (22.4) | 15 (11.2)  |         |                  | 14 (23.7) | 9 (15.3)  |         |                   | 12 (42.9) | 7 (25.0)  |         |
| <i>PHQ-4 above normal</i>                                   | 215              | 31 (14.4)  | 22 (10.2)  | 0.150   | 130                     | 17 (13.1) | 16 (12.3)  | >0.999  | 57               | 6 (10.5)  | 4 (7.0)   | 0.625   | 28                | 8 (28.6)  | 2 (7.1)   | 0.031   |

**eTable 4. Comparison of Perceptions of Respiratory Surveillance Measures and Attitudes Toward the Pandemic of Participating Childcare Workers at Weeks 1 and 12**

N=total, SAL=saliva (mouth rinsing fluid) samples, AgRT= antigen rapid self-test, PHQ-4=Patient Health Questionnaire 4.

|                                                                                                                   | All Participants |           |           |         | Group 1<br>(SAL + AgRT) |           |           |         | Group 2<br>(SAL) |           |           |         | Group 3<br>(AgRT) |          |          |         |
|-------------------------------------------------------------------------------------------------------------------|------------------|-----------|-----------|---------|-------------------------|-----------|-----------|---------|------------------|-----------|-----------|---------|-------------------|----------|----------|---------|
|                                                                                                                   | N                | Week 1    | Week 12   | p-value | N                       | Week 1    | Week 12   | p-value | N                | Week 1    | Week 12   | p-value | N                 | Week 1   | Week 12  | p-value |
| How dangerous do you think the coronavirus is for you and your family?                                            | 62               |           |           | 0.001   | 43                      |           |           | 0.001   | 12               |           |           | >0.999  | 7                 |          |          | >0.999  |
| Not dangerous (1-3)                                                                                               |                  | 23 (37.1) | 39 (62.9) |         |                         | 14 (32.6) | 28 (65.1) |         |                  | 4 (33.3)  | 5 (41.7)  |         |                   | 5 (71.4) | 6 (85.7) |         |
| Dangerous (4-5)                                                                                                   |                  | 39 (62.9) | 23 (37.1) |         |                         | 29 (67.4) | 15 (34.9) |         |                  | 8 (66.7)  | 7 (58.3)  |         |                   | 2 (28.6) | 1 (14.3) |         |
| How dangerous do you think the coronavirus is for society?                                                        | 62               |           |           | 0.039   | 43                      |           |           | 0.180   | 12               |           |           | n.a.    | 7                 |          |          | 0.500   |
| Not dangerous (1-3)                                                                                               |                  | 13 (21.0) | 21 (33.9) |         |                         | 10 (23.3) | 15 (34.9) |         |                  |           | 1 (8.3)   |         |                   | 3 (42.9) | 5 (71.4) |         |
| Dangerous (4-5)                                                                                                   |                  | 49 (79.0) | 41 (66.1) |         |                         | 33 (76.7) | 28 (65.1) |         |                  | 12 (100)  | 11 (91.7) |         |                   | 4 (57.1) | 2 (28.6) |         |
| I personally know someone (family/ friends/acquaintances) who tested positive for/was ill with/died of SARS-CoV-2 | 62               | 52 (83.9) | 50 (80.6) | 0.687   | 43                      | 38 (88.4) | 37 (86.0) | >0.999  | 12               | 10 (83.3) | 10 (83.3) | >0.999  | 7                 | 4 (57.1) | 3 (42.9) | >0.999  |
| How important do you think government-mandated restrictive measures to control SARS-CoV-2 are?                    | 62               |           |           | >0.999  | 43                      |           |           | n.a.    | 12               |           |           | n.a.    | 7                 |          |          | >0.999  |
| Not important (1-2)                                                                                               |                  | 1 (1.6)   | 1 (1.6)   |         |                         |           |           |         |                  |           |           |         |                   | 1 (14.3) | 1 (14.3) |         |
| Important (3-5)                                                                                                   |                  | 61 (98.4) | 61 (98.4) |         |                         | 43 (100)  | 43 (100)  |         |                  | 12 (100)  | 12 (100)  |         |                   | 6 (85.7) | 6 (85.7) |         |
| To what extent do you currently feel limited in your personal life by the coronavirus?                            | 62               |           |           | 0.011   | 43                      |           |           | 0.052   | 12               |           |           | 0.687   | 7                 |          |          |         |
| Not limited (1-3)                                                                                                 |                  | 21 (33.9) | 36 (58.1) |         |                         | 16 (37.2) | 26 (60.5) |         |                  | 5 (41.7)  | 7 (58.3)  |         |                   |          | 3 (42.9) |         |

|                                                                                                                                                                                  | All Participants |           |           |         | Group 1<br>(SAL + AgRT) |           |           |         | Group 2<br>(SAL) |           |          |         | Group 3<br>(AgRT) |          |          |         |
|----------------------------------------------------------------------------------------------------------------------------------------------------------------------------------|------------------|-----------|-----------|---------|-------------------------|-----------|-----------|---------|------------------|-----------|----------|---------|-------------------|----------|----------|---------|
|                                                                                                                                                                                  | N                | Week 1    | Week 12   | p-value | N                       | Week 1    | Week 12   | p-value | N                | Week 1    | Week 12  | p-value | N                 | Week 1   | Week 12  | p-value |
| Limited (4-5)                                                                                                                                                                    |                  | 41 (66.1) | 26 (41.9) |         |                         | 27 (62.8) | 17 (39.5) |         |                  | 7 (58.3)  | 5 (41.7) |         |                   | 7 (100)  | 4 (57.1) |         |
| Supposing the coronavirus vaccination was approved for children, how important would you think it was that the children in your daycare were vaccinated against the Coronavirus? | 61               |           |           | 0.065   | 42                      |           |           | 0.375   | 12               |           |          | 0.625   | 7                 |          |          | 0.500   |
| Not important (1-2)                                                                                                                                                              |                  | 12 (19.7) | 19 (31.1) |         |                         | 8 (19.0)  | 11 (26.2) |         |                  | 1 (8.3)   | 3 (25.0) |         |                   | 3 (42.9) | 5 (71.4) |         |
| Important (3-5)                                                                                                                                                                  |                  | 49 (80.3) | 42 (68.9) |         |                         | 34 (81.0) | 31 (73.8) |         |                  | 11 (91.7) | 9 (75.0) |         |                   | 4 (57.1) | 2 (28.6) |         |
| How important do you think vaccinations are in general?                                                                                                                          | 61               |           |           | >0.999  | 42                      |           |           | n.a.    | 12               |           |          | n.a.    | 7                 |          |          | n.a.    |
| Not important (1-2)                                                                                                                                                              |                  | 1 (1.6)   | 1 (1.6)   |         |                         |           | 1 (2.4)   |         |                  |           |          |         |                   | 1 (14.3) |          |         |
| Important (3-5)                                                                                                                                                                  |                  | 60 (98.4) | 60 (98.4) |         |                         | 42 (100)  | 41 (97.6) |         |                  | 12 (100)  | 12 (100) |         |                   | 6 (85.7) | 7 (100)  |         |
| How time-consuming is it to take your own saliva sample?                                                                                                                         | 54               |           |           |         | 42                      |           |           |         | 12               |           |          |         |                   |          |          |         |
| Not time-consuming (1-3)                                                                                                                                                         |                  | 54 (100)  | 54 (100)  |         |                         | 42 (100)  | 42 (100)  |         |                  | 12 (100)  | 12 (100) |         |                   |          |          |         |
| Time-consuming (4-5)                                                                                                                                                             |                  |           |           |         |                         |           |           |         |                  |           |          |         |                   |          |          |         |
| How difficult is it to collect the saliva sample without assistance?                                                                                                             | 54               |           |           |         | 42                      |           |           |         | 12               |           |          |         |                   |          |          |         |
| Not difficult (1-3)                                                                                                                                                              |                  | 54 (100)  | 54 (100)  |         |                         | 42 (100)  | 42 (100)  |         |                  | 12 (100)  | 12 (100) |         |                   |          |          |         |
| Difficult (4-5)                                                                                                                                                                  |                  |           |           |         |                         |           |           |         |                  |           |          |         |                   |          |          |         |
| How time-consuming is it to perform the AG Rapid test on yourself?                                                                                                               | 50               |           |           |         | 43                      |           |           |         |                  |           |          |         | 7                 |          |          |         |
| Not time-consuming (1-3)                                                                                                                                                         |                  | 47 (94.0) | 50 (100)  |         |                         | 40 (93.0) | 43 (100)  |         |                  |           |          |         |                   | 7 (100)  | 7 (100)  |         |
| Time-consuming (4-5)                                                                                                                                                             |                  | 3 (6.0)   |           |         |                         | 3 (7.0)   |           |         |                  |           |          |         |                   |          |          |         |

|                                                                                                                    | All Participants |           |           |         | Group 1<br>(SAL + AgRT) |           |           |         | Group 2<br>(SAL) |          |           |         | Group 3<br>(AgRT) |          |          |         |
|--------------------------------------------------------------------------------------------------------------------|------------------|-----------|-----------|---------|-------------------------|-----------|-----------|---------|------------------|----------|-----------|---------|-------------------|----------|----------|---------|
|                                                                                                                    | N                | Week 1    | Week 12   | p-value | N                       | Week 1    | Week 12   | p-value | N                | Week 1   | Week 12   | p-value | N                 | Week 1   | Week 12  | p-value |
| How difficult is it to take the AG Rapid Test without assistance?                                                  | 50               |           |           |         | 43                      |           |           |         |                  |          |           |         | 7                 |          |          |         |
| Not difficult (1-3)                                                                                                |                  | 50 (100)  | 50 (100)  |         |                         | 43 (100)  | 43 (100)  |         |                  |          |           |         |                   | 7 (100)  | 7 (100)  |         |
| Difficult (4-5)                                                                                                    |                  |           |           |         |                         |           |           |         |                  |          |           |         |                   |          |          |         |
| How would you rate the frequency of testing, 2 days per week?                                                      | 62               |           |           | 0.107   | 43                      |           |           | 0.055   | 12               |          |           | n.a.    | 7                 |          |          | n.a.    |
| Not often enough                                                                                                   |                  | 6 (9.7)   | 3 (4.8)   |         |                         | 6 (14.0)  | 2 (4.7)   |         |                  |          | 1 (8.3)   |         |                   |          |          |         |
| Appropriate                                                                                                        |                  | 54 (87.1) | 53 (85.5) |         |                         | 35 (81.4) | 36 (83.7) |         |                  | 12 (100) | 11 (91.7) |         |                   | 7 (100)  | 6 (85.7) |         |
| Too often                                                                                                          |                  | 2 (3.2)   | 6 (9.7)   |         |                         | 2 (4.7)   | 5 (11.6)  |         |                  |          |           |         |                   |          | 1 (14.3) |         |
| How does testing affect your sense of security -- that you are protecting yourself and your family from infection? | 61               |           |           | 0.388   | 43                      |           |           | 0.508   | 12               |          |           | n.a.    | 6                 |          |          | >0.999  |
| No effect (1-3)                                                                                                    |                  | 5 (8.2)   | 9 (14.8)  |         |                         | 4 (9.3)   | 7 (16.3)  |         |                  |          | 1 (8.3)   |         |                   | 1 (16.7) | 1 (16.7) |         |
| It has an effect (4-5)                                                                                             |                  | 56 (91.8) | 52 (85.2) |         |                         | 39 (90.7) | 36 (83.7) |         |                  | 12 (100) | 11 (91.7) |         |                   | 5 (83.3) | 5 (83.3) |         |
| How stressful is the testing experience for yourself?                                                              | 62               |           |           | >0.999  | 43                      |           |           | >0.999  | 12               |          |           | n.a.    | 7                 |          |          | >0.999  |
| Not stressful (1-3)                                                                                                |                  | 56 (90.3) | 56 (90.3) |         |                         | 38 (88.4) | 39 (90.7) |         |                  | 12 (100) | 12 (100)  |         |                   | 6 (85.7) | 5 (71.4) |         |
| Stressful (4-5)                                                                                                    |                  | 6 (9.7)   | 6 (9.7)   |         |                         | 5 (11.6)  | 4 (9.3)   |         |                  |          |           |         |                   | 1 (14.3) | 2 (28.6) |         |
| How stressful is the testing for your family overall?                                                              | 60               |           |           | >0.999  | 42                      |           |           | >0.999  | 11               |          |           | n.a.    | 7                 |          |          | >0.999  |
| Not stressful (1-3)                                                                                                |                  | 56 (93.3) | 55 (91.7) |         |                         | 39 (92.9) | 39 (92.9) |         |                  | 11 (100) | 11 (100)  |         |                   | 6 (85.7) | 5 (71.4) |         |
| Stressful (4-5)                                                                                                    |                  | 4 (6.7)   | 5 (8.3)   |         |                         | 3 (7.1)   | 3 (7.1)   |         |                  |          |           |         |                   | 1 (14.3) | 2 (28.6) |         |
| How much does the testing affect the organization of your daily routine?                                           | 62               |           |           | >0.999  | 43                      |           |           | >0.999  | 12               |          |           | n.a.    | 7                 |          |          | >0.999  |
| No impairment (1-3)                                                                                                |                  | 59 (95.2) | 59 (95.2) |         |                         | 41 (95.3) | 42 (97.7) |         |                  | 12 (100) | 12 (100)  |         |                   | 6 (85.7) | 5 (71.4) |         |



|                                                                                                                    | All Participants |           |           |         | Group 1<br>(SAL + AgRT) |           |           |         | Group 2<br>(SAL) |           |           |         | Group 3<br>(AgRT) |          |          |         |
|--------------------------------------------------------------------------------------------------------------------|------------------|-----------|-----------|---------|-------------------------|-----------|-----------|---------|------------------|-----------|-----------|---------|-------------------|----------|----------|---------|
|                                                                                                                    | N                | Week 1    | Week 12   | p-value | N                       | Week 1    | Week 12   | p-value | N                | Week 1    | Week 12   | p-value | N                 | Week 1   | Week 12  | p-value |
| Impairment (4-5)                                                                                                   |                  | 3 (4.8)   | 3 (4.8)   |         |                         | 2 (4.7)   | 1 (2.3)   |         |                  |           |           |         |                   | 1 (14.3) | 2 (28.6) |         |
| To what extent do you fear negative consequences for yourself and your family as a result of the measures/testing? | 60               |           |           | 0.219   | 41                      |           |           | n.a.    | 12               |           |           | n.a.    | 7                 |          |          | >0.999  |
| No fear (1-3)                                                                                                      |                  | 55 (91.7) | 59 (98.3) |         |                         | 39 (95.1) | 41 (100)  |         |                  | 11 (91.7) | 12 (100)  |         |                   | 5 (71.4) | 6 (85.7) |         |
| Fear (4-5)                                                                                                         |                  | 5 (8.3)   | 1 (1.7)   |         |                         | 2 (4.9)   |           |         |                  | 1 (8.3)   |           |         |                   | 2 (28.6) | 1 (14.3) |         |
| What are your views on the planned measures for testing for coronavirus infections?                                | 58               |           |           | >0.999  | 40                      |           |           | >0.999  | 12               |           |           | n.a.    | 6                 |          |          | >0.999  |
| Critical (1-2)                                                                                                     |                  | 3 (5.2)   | 4 (6.9)   |         |                         | 2 (5.0)   | 2 (5.0)   |         |                  |           | 1 (8.3)   |         |                   | 1 (16.7) | 1 (16.7) |         |
| Supportive (3-5)                                                                                                   |                  | 55 (94.8) | 54 (93.1) |         |                         | 38 (95.0) | 38 (95.0) |         |                  | 12 (100)  | 11 (91.7) |         |                   | 5 (83.3) | 5 (83.3) |         |
| Affected by worries about your health                                                                              | 62               |           |           | 0.284   | 43                      |           |           | 0.198   | 12               |           |           | 0.423   | 7                 |          |          | >0.999  |
| Not affected                                                                                                       |                  | 21 (33.9) | 23 (37.1) |         |                         | 14 (32.6) | 17 (39.5) |         |                  | 5 (41.7)  | 3 (25.0)  |         |                   | 2 (28.6) | 3 (42.9) |         |
| Slightly affected                                                                                                  |                  | 32 (51.6) | 35 (56.5) |         |                         | 22 (51.2) | 23 (53.5) |         |                  | 5 (41.7)  | 8 (66.7)  |         |                   | 5 (71.4) | 4 (57.1) |         |
| Strongly affected                                                                                                  |                  | 9 (14.5)  | 4 (6.5)   |         |                         | 7 (16.3)  | 3 (7.0)   |         |                  | 2 (16.7)  | 1 (8.3)   |         |                   |          |          |         |
| Affected by worries about contracting coronavirus                                                                  | 62               |           |           | 0.010   | 43                      |           |           | 0.023   | 12               |           |           | 0.513   | 7                 |          |          | 0.368   |
| Not affected                                                                                                       |                  | 10 (16.1) | 17 (27.4) |         |                         | 6 (14.0)  | 10 (23.3) |         |                  | 2 (16.7)  | 4 (33.3)  |         |                   | 2 (28.6) | 3 (42.9) |         |
| Slightly affected                                                                                                  |                  | 34 (54.8) | 38 (61.3) |         |                         | 24 (55.8) | 29 (67.4) |         |                  | 7 (58.3)  | 6 (50.0)  |         |                   | 3 (42.9) | 3 (42.9) |         |
| Strongly affected                                                                                                  |                  | 18 (29.0) | 7 (11.3)  |         |                         | 13 (30.2) | 4 (9.3)   |         |                  | 3 (25.0)  | 2 (16.7)  |         |                   | 2 (28.6) | 1 (14.3) |         |
| Affected by worries of becoming seriously ill if infected with coronavirus                                         | 60               |           |           | 0.041   | 42                      |           |           | 0.035   | 12               |           |           | 0.572   | 6                 |          |          | n.a.    |
| Not affected                                                                                                       |                  | 13 (21.7) | 18 (30.0) |         |                         | 6 (14.3)  | 11 (26.2) |         |                  | 5 (41.7)  | 5 (41.7)  |         |                   | 2 (33.3) | 2 (33.3) |         |
| Slightly affected                                                                                                  |                  | 26 (43.3) | 30 (50.0) |         |                         | 20 (47.6) | 22 (52.4) |         |                  | 3 (25.0)  | 4 (33.3)  |         |                   | 3 (50.0) | 4 (66.7) |         |

|                                                                                                      | All Participants |           |           |         | Group 1<br>(SAL + AgRT) |           |           |         | Group 2<br>(SAL) |          |          |         | Group 3<br>(AgRT) |          |          |         |
|------------------------------------------------------------------------------------------------------|------------------|-----------|-----------|---------|-------------------------|-----------|-----------|---------|------------------|----------|----------|---------|-------------------|----------|----------|---------|
|                                                                                                      | N                | Week 1    | Week 12   | p-value | N                       | Week 1    | Week 12   | p-value | N                | Week 1   | Week 12  | p-value | N                 | Week 1   | Week 12  | p-value |
| Strongly affected                                                                                    |                  | 21 (35.0) | 12 (20.0) |         |                         | 16 (38.1) | 9 (21.4)  |         |                  | 4 (33.3) | 3 (25.0) |         |                   | 1 (16.7) |          |         |
| Affected by concerns of insufficient capacities for timely treatment in the event of serious illness | 62               |           |           | 0.040   | 43                      |           |           | 0.014   | 12               |          |          | 0.846   | 7                 |          |          | 0.223   |
| Not affected                                                                                         |                  | 22 (35.5) | 33 (53.2) |         |                         | 15 (34.9) | 28 (65.1) |         |                  | 3 (25.0) | 3 (25.0) |         |                   | 4 (57.1) | 2 (28.6) |         |
| Slightly affected                                                                                    |                  | 24 (38.7) | 21 (33.9) |         |                         | 18 (41.9) | 11 (26.6) |         |                  | 5 (41.7) | 6 (50.0) |         |                   | 1 (14.3) | 4 (57.1) |         |
| Strongly affected                                                                                    |                  | 16 (25.8) | 8 (12.9)  |         |                         | 10 (23.3) | 4 (9.3)   |         |                  | 4 (33.3) | 3 (25.0) |         |                   | 2 (28.6) | 1 (14.3) |         |
| Affected by worries about infecting others with coronavirus                                          | 62               |           |           | <0.001  | 43                      |           |           | 0.002   | 12               |          |          | n.a.    | 7                 |          |          | 0.157   |
| Not affected                                                                                         |                  | 4 (6.5)   | 11 (17.7) |         |                         | 3 (7.0)   | 9 (20.9)  |         |                  | 4 (33.3) | 1 (8.3)  |         |                   | 1 (14.3) | 1 (14.3) |         |
| Slightly affected                                                                                    |                  | 21 (33.9) | 32 (51.6) |         |                         | 15 (34.9) | 23 (53.5) |         |                  |          | 5 (41.7) |         |                   | 2 (28.6) | 4 (57.1) |         |
| Strongly affected                                                                                    |                  | 37 (59.7) | 19 (30.6) |         |                         | 25 (58.1) | 11 (25.6) |         |                  | 8 (66.7) | 6 (50.0) |         |                   | 4 (57.1) | 2 (28.6) |         |
| <i>PHQ-4 above Normal</i>                                                                            | 59               | 10 (16.9) | 6 (10.2)  | 0.289   | 41                      | 5 (12.2)  | 2 (4.9)   | 0.375   | 11               | 3 (27.3) | 3 (27.3) | >0.999  | 7                 | 2 (28.6) | 1 (14.3) | >0.999  |

**eTable 5. Factors Influencing Children's Unsuccessful Long-term Participation**  
**(n=335 with questionnaire responses; 114 of which unsuccessful, 221 successful; univariable and multivariable analyses).**

| Likelihood of unsuccessful childrens' participation in respiratory surveillance.<br>(Drop-out or fewer than 60% of scheduled tests performed for participant) |                       |         |                         |         |                        |         |
|---------------------------------------------------------------------------------------------------------------------------------------------------------------|-----------------------|---------|-------------------------|---------|------------------------|---------|
|                                                                                                                                                               | Univariable analyses* |         | Multivariable analyses* |         |                        |         |
|                                                                                                                                                               | OR (95%-CI)           | p-value | Model 1<br>OR (95%-CI)  | p-value | Model 2<br>OR (95%-CI) | p-value |
| <b>Group organization, socio-demographic data</b>                                                                                                             |                       |         |                         |         |                        |         |
| Group                                                                                                                                                         |                       | 0.0084  |                         | 0.0607  |                        | 0.0758  |
| Group 1 (Reference) (saliva sample +AG-Rapid test)                                                                                                            | 1.00                  |         | 1.00                    |         | 1.00                   |         |
| Group 2 (saliva sample only)                                                                                                                                  | 0.57 (0.33-0.99)      |         | 0.51 (0.28-0.91)        |         | 0.50 (0.28-0.91)       |         |
| Group 3 (AG-Rapid test only)                                                                                                                                  | 2.01 (1.08-3.76)      |         | 1.27 (0.59-2.74)        |         | 1.21 (0.53-2.74)       |         |
| Child Age (ref: 2 years) per increase of 1 unit                                                                                                               | 0.58 (0.42-0.80)      | 0.0005  | 0.61 (0.43-0.88)        | 0.0088  | 0.60 (0.41-0.88)       | 0.0092  |
| Child with chronic health condition                                                                                                                           | 0.68 (0.37-1.25)      | 0.1965  | 0.73 (0.41-1.29)        | 0.2944  | 0.75 (0.44-1.30)       | 0.3381  |
| Age of parents (ref=28 years) per 1 unit increase                                                                                                             | 0.16 (0.04-0.62)      | 0.0095  | 0.26 (0.06-1.16)        | 0.0801  | 0.27 (0.06-1.19)       | 0.0860  |
| Employment situation (full time vs. other)                                                                                                                    | 1.21 (0.73-2.03)      | 0.4662  | 1.34(0.77-2.33)         | 0.2979  | 1.33 (0.76.-2.30)      | 0.3187  |
| <b>Attitudes towards SARS-COV-2</b>                                                                                                                           |                       |         |                         |         |                        |         |
| Assessment of SARS-CoV-2 as dangerous to self or family (Ref: not dangerous).                                                                                 | 0.85 (0.43-1.67)      | 0.6304  |                         |         | 0.85 (0.41-1.78)       | 0.6281  |

\*generalized estimation equation with random effects (cluster= parents).

Model 1: inclusion of sociodemographic variables and group membership only if significant at the 10% level in univariable analysis (Chi<sup>2</sup> test), plus inclusion of sociodemographic variables considered as contextual predictors.

Model 2: as Model 1, plus inclusion of parents' attitudes.

**eTable 6. Factors Influencing Successful Participation of Childcare Workers**

(n=109 with questionnaire responses, 67 of which successful, 42 unsuccessful; univariable and multivariable analyses).

| Likelihood of unsuccessful CCWs' participation in respiratory surveillance.<br>(Drop-out, or fewer than 60% of scheduled tests performed for participant) |                      |        |                         |             |                   |       |
|-----------------------------------------------------------------------------------------------------------------------------------------------------------|----------------------|--------|-------------------------|-------------|-------------------|-------|
|                                                                                                                                                           | Univariable analyses |        | Multivariable analyses* |             |                   |       |
|                                                                                                                                                           | OR (95%-CI)          | p-Wert | Model 1                 |             | Model 2           |       |
| OR (95%-CI)                                                                                                                                               |                      |        | p-Wert                  | OR (95%-CI) | p-Wert            |       |
| <b>Study group, socio-demographic data</b>                                                                                                                |                      |        |                         | 0.089       |                   | 0.107 |
| Group 1 (Reference) (saliva sample +AG-Rapid self-test)                                                                                                   | 1.00                 |        | 1.00                    |             | 1.00              |       |
| Group 2 (saliva sample only)                                                                                                                              | 0.23 (0.06-0.84)     | 0.027  | 0.22 (0.06-0.86)        | 0.029       | 0.23 (0.06-0.93)  | 0.039 |
| Group 3 (AG-Rapid self test only)                                                                                                                         | 1.08 (0.30-3.83)     | 0.907  | 0.98 (0.26-3.69)        | 0.980       | 0.60 (0.14-2.53)  | 0.490 |
| Age (per 1 unit increase)                                                                                                                                 | 0.95 (0.92-0.98)     | 0.002  | 0.95 (0.92-0.99)        | 0.005       | 0.95 (0.92-0.99)  | 0.011 |
| Chronic health condition                                                                                                                                  | 0.45 (0.16-1.26)     | 0.13   | 0.54 (0.18-1.60)        | 0.266       | 0.67 (0.21-2.08)  | 0.486 |
| <b>Attitudes/Opinions</b>                                                                                                                                 |                      |        |                         |             |                   |       |
| Assessment of SARS-CoV-2 as dangerous to self or family (Ref: not dangerous).                                                                             | 0.28 (0.12-0.63)     | 0.002  |                         |             | 0.37 (0.15-0.92)  | 0.033 |
| Attitude towards vaccinations in general (Ref: not important)                                                                                             | 0.14 (0.02-1.34)     | 0.088  |                         |             | 0.225 (0.02-2.63) | 0.234 |

\*Model 1: inclusion of sociodemographic variables / group membership only if significant at the 10% level in univariable analysis (Chi<sup>2</sup> test).

Model 2: as Model 1, plus inclusion of participants' attitudes/opinions.

**eFigure 1.** Flow Diagram

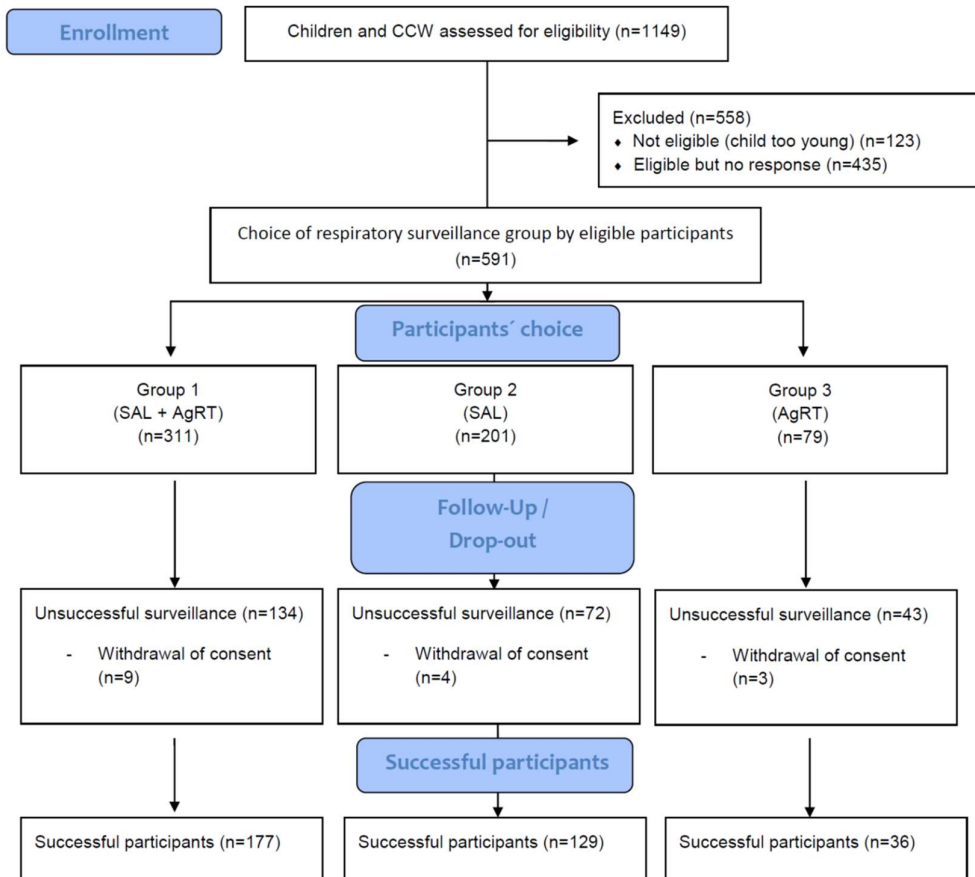

All data in the Flow chart refer to the 12-week surveillance period. CCW= child care workers, SAL=saliva testing, AgRT= antigen rapid self-test

**eFigure 2.** Age-Adjusted Incidences in the City and District of Wuerzburg for the DCC-Relevant Age Group (2-6 years; orange) and Corresponding Incidences Among Children in all 69 DCCs (blue) During the Study Period

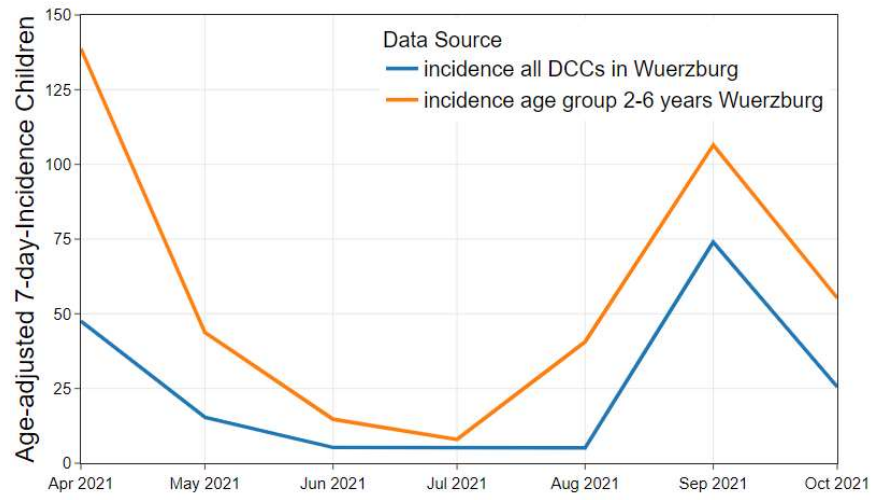

## eReferences.

1. Forster J, Streng A, Rudolph P, et al. Feasibility of SARS-CoV-2 Surveillance Testing Among Children and Childcare Workers at German Day Care Centers: A Nonrandomized Controlled Trial. *JAMA Network Open*. 2022;5(1):e2142057-e2142057. doi:10.1001/jamanetworkopen.2021.42057
2. Krone M, Gutling J, Wagener J, et al. Performance of Three SARS-CoV-2 Immunoassays, Three Rapid Lateral Flow Tests, and a Novel Bead-Based Affinity Surrogate Test for the Detection of SARS-CoV-2 Antibodies in Human Serum. *J Clin Microbiol*. Jul 19 2021;59(8):e0031921. doi:10.1128/JCM.00319-21
3. Bethell CD, Read D, Stein RE, Blumberg SJ, Wells N, Newacheck PW. Identifying children with special health care needs: development and evaluation of a short screening instrument. *Ambul Pediatr*. Jan-Feb 2002;2(1):38-48. doi:10.1367/1539-4409(2002)002<0038:icwshc>2.0.co;2
4. Achenbach TM. *Achenbach system of empirically based assessment (ASEBA) : development, findings, theory, and applications*. University of Vermont, Research Center of Children, Youth & Families; 2009.
5. Flanders WD, Kleinbaum DG. Basic models for disease occurrence in epidemiology. *Int J Epidemiol*. Feb 1995;24(1):1-7. doi:10.1093/ije/24.1.1
