# Supplementary material for: Acceptance of Different Self-sampling Methods for Semiweekly SARS-CoV-2 Testing in Asymptomatic Children and Childcare Workers at German Day Care Centers: A Nonrandomized Controlled Trial
Source: PubMed Central journal article supplement (PMC9478779; doi:10.1001/jamanetworkopen.2022.31798), 2022-09-15
Supplement: jamanetwopen-e2231798-s003.pdf [file jamanetwopen-e2231798-s003.pdf]

\*Indicates required information. Only first name, last name, and suffix will appear in PubMed.

| <b>*Group Name(s): Wue-KiTa-CoV 2.0-Study Group</b> |                   |                              |                  |                                                                 |                                          |                                                         |                                                                                            |
|-----------------------------------------------------|-------------------|------------------------------|------------------|-----------------------------------------------------------------|------------------------------------------|---------------------------------------------------------|--------------------------------------------------------------------------------------------|
| <b>*First Name and Middle Initial(s)</b>            | <b>*Last Name</b> | <b>*Suffix (eg, Jr, III)</b> | Academic Degrees | Institution                                                     | Location (city, state/province, country) | Role or Contribution, eg, chair, principal investigator | Group (if more than 1 Group listed in the byline and/or Subgroup (eg, Steering Committee)) |
| Annsophie                                           | Amman             | -                            |                  | Institute for Hygiene and Microbiology, University of Wuerzburg | Würzburg, Germany                        | Field activities, data entry                            |                                                                                            |
| Anastasia                                           | Besenfelder       | -                            |                  | Institute for Hygiene and Microbiology, University of Wuerzburg | Würzburg, Germany                        | Technical support                                       |                                                                                            |
| Leonie                                              | Bode              | -                            |                  | Institute for Hygiene and Microbiology, University of Wuerzburg | Würzburg, Germany                        | Field activities, data entry                            |                                                                                            |
| Inga                                                | Enders            | -                            |                  | Institute for Hygiene and Microbiology, University of Wuerzburg | Würzburg, Germany                        | Field activities, data entry                            |                                                                                            |
| Thiemo                                              | Frank             | -                            |                  | Institute for Hygiene and Microbiology, University of Wuerzburg | Würzburg, Germany                        | Field activities, data entry                            |                                                                                            |
| Kathrin                                             | Frei              | -                            |                  | Institute for Hygiene and Microbiology, University of Wuerzburg | Würzburg, Germany                        | Technical support                                       |                                                                                            |
| Greta                                               | Habersack         | -                            |                  | Institute for Hygiene and Microbiology, University of Wuerzburg | Würzburg, Germany                        | Field activities, data entry                            |                                                                                            |
| Viktoria                                            | Hamway            | -                            |                  | Institute for Hygiene and Microbiology, University of Wuerzburg | Würzburg, Germany                        | Field activities, data entry                            |                                                                                            |
| Theresa                                             | Höferth           | -                            |                  | Institute for Hygiene and Microbiology, University of Wuerzburg | Würzburg, Germany                        | Technical support                                       |                                                                                            |

## Supplemental Online Content: Nonauthor Collaborators

\*Indicates required information. Only first name, last name, and suffix will appear in PubMed.

| *First Name and Middle Initial(s) | *Last Name | *Suffix (eg, Jr, III) | Academic Degrees | Institution                                                     | Location (city, state/province, country) | Role or Contribution, eg, chair, principal investigator | Group (if more than 1 Group listed in the byline) and/or Subgroup (eg, Steering Committee) |
|-----------------------------------|------------|-----------------------|------------------|-----------------------------------------------------------------|------------------------------------------|---------------------------------------------------------|--------------------------------------------------------------------------------------------|
| Thiên-Tri                         | Lâm        | -                     | MD               | Institute for Hygiene and Microbiology, University of Wuerzburg | Würzburg, Germany                        | Advice on coordination                                  |                                                                                            |
| Sabrina                           | Mündlein   | -                     |                  | Institute for Hygiene and Microbiology, University of Wuerzburg | Würzburg, Germany                        | Technical support                                       |                                                                                            |
| Konstanze                         | Rauch      | -                     |                  | Institute for Hygiene and Microbiology, University of Wuerzburg | Würzburg, Germany                        | Technical support                                       |                                                                                            |
| Christoph                         | Schoen     |                       | MD, PhD, MSc     | Institute for Hygiene and Microbiology, University of Wuerzburg | Würzburg, Germany                        | Advice on coordination                                  |                                                                                            |
| Timo                              | Spannagel  | -                     |                  | Institute for Hygiene and Microbiology, University of Wuerzburg | Würzburg, Germany                        | Field activities, data entry                            |                                                                                            |
| Fabian                            | Rothbauer  | -                     |                  | Institute for Hygiene and Microbiology, University of Wuerzburg | Würzburg, Germany                        | Field activities, data entry                            |                                                                                            |
| Marianna                          | Abert      | -                     |                  | Department of Pediatrics, University Hospital Wuerzburg         | Würzburg, Germany                        | Field activities                                        |                                                                                            |
| Julia                             | Bley       | -                     | MD               | Department of Pediatrics, University Hospital Wuerzburg         | Würzburg, Germany                        | Field activities                                        |                                                                                            |
| Tatjana                           | Durnev     | -                     |                  | Department of Pediatrics, University Hospital Wuerzburg         | Würzburg, Germany                        | Communication with study participants                   |                                                                                            |
| Carolin                           | Glatzle    | -                     |                  | Department of Pediatrics, University Hospital Wuerzburg         | Würzburg, Germany                        | Field activities                                        |                                                                                            |
| Antonia                           | Hardung    | -                     |                  | Department of Pediatrics, University Hospital Wuerzburg         | Würzburg, Germany                        | Field activities                                        |                                                                                            |
| Katharina                         | Karch      | -                     |                  | Department of Pediatrics, University Hospital Wuerzburg         | Würzburg, Germany                        | Field activities                                        |                                                                                            |

## Supplemental Online Content: Nonauthor Collaborators

\*Indicates required information. Only first name, last name, and suffix will appear in PubMed.

| *First Name and Middle Initial(s) | *Last Name   | *Suffix (eg, Jr, III) | Academic Degrees | Institution                                                       | Location (city, state/province, country) | Role or Contribution, eg, chair, principal investigator | Group (if more than 1 Group listed in the byline and/or Subgroup (eg, Steering Committee)) |
|-----------------------------------|--------------|-----------------------|------------------|-------------------------------------------------------------------|------------------------------------------|---------------------------------------------------------|--------------------------------------------------------------------------------------------|
| Sebastian                         | Kollert      | -                     |                  | Department of Pediatrics, University Hospital Wuerzburg           | Würzburg, Germany                        | Field activities, data entry                            |                                                                                            |
| Tanja                             | Mastorakis   | -                     |                  | Department of Pediatrics, University Hospital Wuerzburg           | Würzburg, Germany                        | Field activities                                        |                                                                                            |
| Lena                              | Schregelmann | -                     |                  | Department of Pediatrics, University Hospital Wuerzburg           | Würzburg, Germany                        | Field activities                                        |                                                                                            |
| Victoria                          | Sokalski     | -                     |                  | Department of Pediatrics, University Hospital Wuerzburg           | Würzburg, Germany                        | Field activities                                        |                                                                                            |
| Eva-Lotta                         | Tanzberger   | -                     |                  | Department of Pediatrics, University Hospital Wuerzburg           | Würzburg, Germany                        | Data entry                                              |                                                                                            |
| Anne                              | Thieme       | -                     | MD               | Department of Pediatrics, University Hospital Wuerzburg           | Würzburg, Germany                        | Field activities                                        |                                                                                            |
| Denise                            | Yilmaz       | -                     |                  | Department of Pediatrics, University Hospital Wuerzburg           | Würzburg, Germany                        | Field activities, data entry                            |                                                                                            |
| Stefan                            | Zimmerling   | -                     |                  | Department of Pediatrics, University Hospital Wuerzburg           | Würzburg, Germany                        | Field activities                                        |                                                                                            |
| Pauline                           | Nehm         | -                     |                  | Hematological Laboratory, University Hospital Wuerzburg           | Würzburg, Germany                        | Field activities                                        |                                                                                            |
| Max                               | Siegl        | -                     |                  | Hematological Laboratory, University Hospital Wuerzburg           | Würzburg, Germany                        | Field activities                                        |                                                                                            |
| Brigitte                          | Wehner       | -                     |                  | Hematological Laboratory, University Hospital Wuerzburg           | Würzburg, Germany                        | Field activities                                        |                                                                                            |
| Kerstin                           | Knies        | -                     | PhD              | Institute for Virology and Immunobiology, University of Wuerzburg | Würzburg, Germany                        | Technical support                                       |                                                                                            |
| Rebecca                           | Richter      | -                     |                  | Institute for Virology and Immunobiology, University of Wuerzburg | Würzburg, Germany                        | Technical support                                       |                                                                                            |
| Hülya                             | Düber        | -                     | PhD              | City of Wuerzburg                                                 | Würzburg, Germany                        | Advice on coordination                                  |                                                                                            |

Supplemental Online Content: Nonauthor Collaborators

\*Indicates required information. Only first name, last name, and suffix will appear in PubMed.

| <b>*First Name and Middle Initial(s)</b> | <b>*Last Name</b> | <b>*Suffix (eg, Jr, III)</b> | Academic Degrees | Institution                                   | Location (city, state/province, country) | Role or Contribution, eg, chair, principal investigator | Group (if more than 1 Group listed in the byline) and/or Subgroup (eg, Steering Committee) |
|------------------------------------------|-------------------|------------------------------|------------------|-----------------------------------------------|------------------------------------------|---------------------------------------------------------|--------------------------------------------------------------------------------------------|
| Monika                                   | Kraft             | -                            |                  | City of Wuerzburg                             | Würzburg, Germany                        | Advice on coordination                                  |                                                                                            |
| Christian                                | Schuchardt        | -                            |                  | City of Wuerzburg                             | Würzburg, Germany                        | Advice on coordination                                  |                                                                                            |
| Barbara                                  | Finkenberg        | -                            | MD               | Health Department City and District Wuerzburg | Würzburg, Germany                        | Advice on coordination                                  |                                                                                            |
| Johann                                   | Löw               | -                            | MD               | Health Department City and District Wuerzburg | Würzburg, Germany                        | Advice on coordination                                  |                                                                                            |
