# Supplementary material for: Acceptance of Different Self-sampling Methods for Semiweekly SARS-CoV-2 Testing in Asymptomatic Children and Childcare Workers at German Day Care Centers: A Nonrandomized Controlled Trial
Source: PubMed Central journal article supplement (PMC9478779; doi:10.1001/jamanetworkopen.2022.31798), 2022-09-15
Supplement: jamanetwopen-e2231798-s004.pdf [file jamanetwopen-e2231798-s004.pdf]

## Data Sharing Statement

Engels. Acceptance of Different Self-sampling Methods for Semiweekly SARS-CoV-2 Testing in Asymptomatic Children and Childcare Workers at German Day Care Centers. *JAMA Netw Open*. Published September 15, 2022. doi:10.1001/jamanetworkopen.2022.31798

### Data

**Data available:** Yes

**Data types:** Participant data with identifiers

**How to access data:** [liese\\_j@ukw.de](mailto:liese_j@ukw.de) (corresponding author)

**When available:** With publication

### Supporting Documents

**Document types:** None

### Additional Information

**Who can access the data:** Researchers whose proposed use of the data has been approved

**Types of analyses:** Research in the context infectious diseases spreading in child day care

**Mechanisms of data availability:** After approval of a proposal by the corresponding author
